# Supplementary material for: Central fatness and risk of all cause mortality: systematic review and dose-response meta-analysis of 72 prospective cohort studies
Source: PubMed Central journal article supplement — BMJ. 2020 Sep 23;370:m3324. doi: 10.1136/bmj.m3324 (PMC7509947; doi:10.1136/bmj.m3324), 2020-09-23
Supplement: jaya052590.ww.pdf [file jaya052590.ww.pdf]

**Central fatness and the risk of all-cause mortality: systematic review and dose-response  
meta-analysis of 72 prospective cohort studies**

**Appendix 1:** Tables S1-S5, and Figures S1-S14

Supplementary Materials

**Table S1.** Search strategy to find potential relevant articles for inclusion in meta-analysis of central fatness and the risk of all-cause mortality.

| <b>PubMed</b>                                                                                                                                                                                                                                                                                                                   |
|---------------------------------------------------------------------------------------------------------------------------------------------------------------------------------------------------------------------------------------------------------------------------------------------------------------------------------|
| 1. obesity [All fields] OR adiposity [All fields] OR fatness [All fields] OR overweight [All fields] OR “waist circumference” [All fields] OR “hip circumference” [All fields] OR “thigh circumference” [All fields]                                                                                                            |
| 2. “waist-to-hip ratio” [All fields] OR “waist-to-height ratio” [All fields] OR “waist-to-thigh ratio” [All fields] OR “body adiposity index” [All fields] OR “A body shape index” [All fields]                                                                                                                                 |
| 3. WC [All fields] OR WHR [All fields] OR WHtR [All fields] OR WTR [All fields] BAI [All fields] OR ABSI [All fields]                                                                                                                                                                                                           |
| 4. prospective [All fields] OR prospectively [All fields] OR retrospective [All fields] observation [All fields] OR observational [All fields] OR cohort [All fields]                                                                                                                                                           |
| 5. follow-up [All fields] OR nested [All fields] OR “relative risk” [All fields] OR “hazard ratio” [All fields] OR “odds ratio” [All fields] OR cohorts [All fields]                                                                                                                                                            |
| 6. mortality [Title/Abstract] OR death [Title/Abstract] OR deaths [Title/Abstract] OR survival [Title/Abstract]                                                                                                                                                                                                                 |
| 7. maternal [Title] OR pregnancy [Title] OR pregnant [Title] OR mothers [Title] OR children [Title]                                                                                                                                                                                                                             |
| 8. 1 AND 2 AND 3                                                                                                                                                                                                                                                                                                                |
| 9. 4 AND 5                                                                                                                                                                                                                                                                                                                      |
| 10. 6 AND 8 AND 9                                                                                                                                                                                                                                                                                                               |
| 11. 10 AND NOT 7                                                                                                                                                                                                                                                                                                                |
| <b>Scopus</b>                                                                                                                                                                                                                                                                                                                   |
| 1. obesity [All fields] OR adiposity [All fields] OR fatness [All fields] OR overweight [All fields] OR “waist circumference” [All fields] OR “hip circumference” [All fields] OR “thigh circumference” [All fields]                                                                                                            |
| 2. “waist-to-hip ratio” [All fields] OR “waist-to-height ratio” [All fields] OR “waist-to-thigh ratio” [All fields] OR “body adiposity index” [All fields] OR “A body shape index” [All fields]                                                                                                                                 |
| 3. WC [All fields] OR WHR [All fields] OR WHtR [All fields] OR WTR [All fields] BAI [All fields] OR ABSI [All fields]                                                                                                                                                                                                           |
| 4. prospective [Title/abstract/keyword] OR prospectively [Title/abstract/keyword] OR retrospective [Title/abstract/keyword] observation [Title/abstract/keyword] OR observational [Title/abstract/keyword] OR cohort [Title/abstract/keyword] OR cohorts [Title/abstract/keyword]                                               |
| 5. follow-up [Title/abstract/keyword] OR nested [Title/abstract/keyword] OR “relative risk” [Title/abstract/keyword] OR “hazard ratio” [Title/abstract/keyword] OR “odds ratio” [Title/abstract/keyword] OR case-cohort [Title/abstract/keyword] OR case-referent [Title/abstract/keyword] OR duration [Title/abstract/keyword] |
| 6. mortality [Title/abstract/keyword] OR death [Title/abstract/keyword] OR deaths [Title/abstract/keyword] OR survival [Title/abstract/keyword]                                                                                                                                                                                 |
| 7. maternal [Title] OR pregnancy [Title] OR pregnant [Title] OR mothers [Title] OR children [Title]                                                                                                                                                                                                                             |
| 8. 1 AND 2 AND 3                                                                                                                                                                                                                                                                                                                |
| 9. 4 AND 5                                                                                                                                                                                                                                                                                                                      |
| 10. 6 AND 8 AND 9                                                                                                                                                                                                                                                                                                               |
| 11. 10 AND NOT 7                                                                                                                                                                                                                                                                                                                |

Supplementary Materials

**Table S2.** General characteristics of the studies included in meta-analysis of central fatness and the risk of all-cause mortality.

| Author, year (ref No.)         | Country   | Study name                                         | Follow-up duration (years) | Gender | Participants (n) | Age range (mean), years | Cases (n) | Exposures (assessment)       |
|--------------------------------|-----------|----------------------------------------------------|----------------------------|--------|------------------|-------------------------|-----------|------------------------------|
| Andersen <sup>35</sup> , 2015  | China     | the Shanghai Men's Health Study                    | 7.5                        | M      | 53,425           | 40-74                   | 2058      | WHR (measured)               |
| Andersen <sup>35</sup> , 2015  | China     | the Shanghai Women's Health Study                  | 13.2                       | W      | 63,017           | 40-70                   | 3167      | WHR (measured)               |
| Taylor <sup>36</sup> , 2010    | UK        | the British Women's Heart and Health Study         | NA                         | W      | 3778             | 60-79                   | 486       | WHR, WC, WHtR, HC (measured) |
| Taylor <sup>36</sup> , 2010    | UK        | phase 3 of the Caerphilly Prospective Study        | NA                         | M      | 1920             | 45-59                   | 855       | WHR, WC, WHtR, HC (measured) |
| Adegbija <sup>37</sup> , 2016  | Australia | Australia's Northern Territory screening programme | 18                         | W/M    | 934              | 18-76                   | 216       | WC (measured)                |
| Baik <sup>38</sup> , 2000      | US        | The Health Professionals Follow-up Study           | 10                         | M      | 39,756           | 40-75                   | 1972      | WC, WHR, HC (self-report)    |
| Beleigoli <sup>39</sup> , 2012 | Brazil    | The Bambur' Cohort Study of Ageing                 | 10                         | W/M    | 1450             | >60                     | 521       | WC (measured)                |
| Bellocco <sup>40</sup> , 2010  | Sweden    | the Swedish National March Cohort                  | 10                         | W/M    | 40,729           | 50                      | 1943      | WC (self-report)             |
| Berentzen <sup>41</sup> , 2010 | Denmark   | Danish Diet, Cancer and Health study               | 6.7                        | W/M    | 26,625           | 50-64 (56)              | 929       | WC (measured)                |
| Bigaard <sup>42</sup> , 2004   | Denmark   | Danish prospective study 'Diet, Cancer and Health  | 6.8                        | W/M    | 57,054           | 50-64                   | 2290      | HC (measured)                |
| Boggs <sup>43</sup> , 2011     | US        | the Black Women's Health Study                     | 13                         | W      | 51,695           | 21-69                   | 1773      | WC (self-report)             |
| Bombelli <sup>44</sup> , 2013  | Italy     | the PAMELA study                                   | 12.5                       | W/M    | 2005             | 51                      | 225       | WC (measured)                |
| Bowman <sup>45</sup> , 2017    | UK        | UK Biobank Study                                   | 8.3                        | W/M    | 130,473          | 60-69 (64)              | 2974      | WHR (measured)               |
| Calori <sup>46</sup> , 2011    | Italy     | the Cremona study                                  | 15                         | W/M    | 2074             | >40 (57)                | 495       | WC (measured)                |
| Cameron <sup>47</sup> , 2009   | Australia | the AusDiab study                                  | 8                          | W/M    | 6072             | 25-75                   | 316       | WC, WHR                      |

Supplementary Materials

|                                        |             |                                                                                 |       |     |         |            |        |                                                  |
|----------------------------------------|-------------|---------------------------------------------------------------------------------|-------|-----|---------|------------|--------|--------------------------------------------------|
|                                        |             |                                                                                 |       |     |         |            |        | (measured)                                       |
| Cohen <sup>48</sup> , 2012             | US          | the Southern Community Cohort Study                                             | 3.4   | W/M | 8319    | 40-79 (53) | 178    | WC, WHR (measured)                               |
| Danon-hersch <sup>49</sup> , 2017      | Switzerland | The Lc65+ COHORT                                                                | 8.5   | W/M | 1293    | 65-70      | 130    | WC (measured)                                    |
| Dhana <sup>50</sup> , 2015             | Netherlands | The Rotterdam Study                                                             | 22    | W/M | 6366    | >55 (69)   | 3675   | WHtR, ABSI, WC, WHR (measured) (linear analysis) |
| Dolan <sup>51</sup> , 2007             | US          | Study of Osteoporotic Fractures                                                 | 8     | W   | 8029    | >65        | 945    | WC (measured)                                    |
| Folsom <sup>52</sup> , 2000            | US          | The Iowa Women's Health Study                                                   | 11-12 | W   | 31,702  | 55-69      | 2476   | WC, WHR (self-report)                            |
| Grant <sup>53</sup> , 2017             | Australia   | The North West Adelaide Health Study (NWAHS)                                    | 7.5   | W/M | 3311    | >18 (50)   | 427    | WC, ABSI (measured)                              |
| Guallar-Castillón <sup>54</sup> , 2009 | Spain       | A population-based cohort                                                       | 6     | W/M | 3536    | >60        | 659    | WC (measured)                                    |
| He <sup>55</sup> , 2016                | China       | Chengdu cohort study                                                            | 15    | M   | 780     | 49         | 29     | ABSI (measured)                                  |
| Heitmann <sup>56</sup> , 2009          | Denmark     | the Danish MONICA study                                                         | 12.5  | W/M | 2816    | 35-65 (50) | 412    | TC (measured)                                    |
| Heitmann <sup>57</sup> , 2004          | Denmark     | the Danish MONICA study (men only)                                              | 13    | M   | 1514    | 35-65      | 270    | HC (measured)                                    |
| Hotchkiss <sup>58</sup> , 2013         | UK          | Scottish Health Survey                                                          | 10.1  | W/M | 19,329  | 18-86      | 1495   | WC, WHR (measured)                               |
| Howell <sup>59</sup> , 2018            | US          | The National Health and Nutrition Examination Survey (NHANES) III and 1999-2010 | 11    | W/M | 10,329  | 39         | 1423   | WHtR (measured)                                  |
| Hu <sup>60</sup> , 2018                | China       | Dongfeng-Tongji cohort                                                          | 8.5   | W/M | 26,143  | 64         | 2246   | WC, WHR (measured)                               |
| Jacobs <sup>61</sup> , 2010            | US          | The Cancer Prevention Study-II Nutrition Cohort                                 | 9     | W/M | 104,843 | >55 (68)   | 14,647 | WC (self-report)                                 |
| Janssen <sup>62</sup> , 2005           | US          | Cardiovascular Health Study                                                     | 9     | M   | 5200    | >65        | 1564   | WC (measured)                                    |
| Kahn <sup>63</sup> , 2012              | US          | The National Health and Nutrition                                               | 18.1  | W/M | 11,437  | 18-64      | 1081   | WC, WHR,                                         |

Supplementary Materials

|                                     |                          |                                                                                     |     |     |         |               |        |                                     |
|-------------------------------------|--------------------------|-------------------------------------------------------------------------------------|-----|-----|---------|---------------|--------|-------------------------------------|
|                                     |                          | Examination Survey (NHANES) III                                                     |     |     |         |               |        | WHtR, WTR<br>(measured)             |
| Kalmijn <sup>64</sup> , 1999        | US                       | The Honolulu Heart Program                                                          | 4.5 | M   | 3741    | 71-93         | 766    | WHR<br>(measured)                   |
| Katzmarzyk <sup>65</sup> , 2013     | US                       | The Pennington Center Longitudinal Study                                            | 6.2 | W/M | 14,343  | 18-89         | 264    | WC, WHR,<br>WHtR, BAI<br>(measured) |
| Klingberg <sup>66</sup> , 2015      | Denmark<br>and<br>Sweden | the Danish MONICA study and the Prospective Population Study of Women in Gothenburg | 6   | W   | 2492    | 48.8          | 787    | WC<br>(measured)                    |
| Koster <sup>67</sup> , 2008         | US                       | the NIH-AARP Diet and Health Study                                                  | 9   | W/M | 245,533 | 51-72<br>(63) | 24,820 | WC<br>(self-report)                 |
| Krakauer <sup>68</sup> , 2012       | US                       | The National Health and Nutrition Examination Survey (NHANES) 1999-2004             | 5   | W/M | 14,105  | ≥18           | 828    | WC, ABSI<br>(measured)              |
| Krakauer <sup>69</sup> , 2014       | UK                       | the British Health and Lifestyle Survey (HALS)                                      | 24  | W/M | 7011    | ≥18           | 2203   | WC, WHtR,<br>ABSI<br>(measured)     |
| Lahmann <sup>70</sup> , 2002        | Sweden                   | The Malmo Diet and Cancer Study                                                     | 5.7 | W/M | 27,716  | 45-73         | 982    | WHR<br>(measured)                   |
| Lanfer <sup>71</sup> , 2014         | Denmark<br>and<br>Sweden | the Danish MONICA study and the Prospective Population Study of Women in Gothenburg | 23  | W   | 2867    | 49            | 821    | HC<br>(measured)                    |
| Laukkanen <sup>72</sup> , 2007      | Finland                  | Kuopio Ischaemic Heart Disease Risk Factor Study                                    | 16  | M   | 1639    | 52            | 304    | WHR<br>(measured)                   |
| Lee <sup>73</sup> , 1999            | US                       | Cooper Clinic Study                                                                 | 8   | M   | 21,925  | 30-83<br>(44) | 428    | WC<br>(measured)                    |
| Lee <sup>74</sup> , 2012            | China                    | Cohort study on osteoporosis and general health in Hong Kong                        | 6   | W/M | 9078    | >65           | 361    | WC, WHR<br>(measured)               |
| Lindqvist <sup>75</sup> , 2006      | Sweden                   | Gothenburg Women study                                                              | 24  | W   | 1462    | 38-60         | 265    | WHR<br>(measured)                   |
| Lissner <sup>76</sup> , 2001        | Sweden                   | Swedish Female Cohort                                                               | 24  | W   | 1405    | 38-60<br>(47) | 257    | HC<br>(measured)                    |
| Martinez-Gomez <sup>77</sup> , 2014 | Spain                    | Cohort of older adults                                                              | 9.4 | W/M | 2930    | >60           | 865    | WC<br>(measured)                    |

Supplementary Materials

|                                       |           |                                                                                                                |      |     |         |                |        |                                          |
|---------------------------------------|-----------|----------------------------------------------------------------------------------------------------------------|------|-----|---------|----------------|--------|------------------------------------------|
| Mason <sup>78</sup> , 2008            | Canada    | Canada Fitness Survey (CFS)                                                                                    | 12   | W/M | 10,638  | 20-69<br>(38)  | 571    | WC, HC,<br>WHR, TC,<br>WTR<br>(measured) |
| MCNeely <sup>79</sup> , 2012          | US        | the Japanese Community Diabetes Study                                                                          | 16.9 | W/M | 733     | 34-74          | 161    | WC<br>(measured)                         |
| Moliner-Urdiales <sup>80</sup> , 2013 | US        | Aerobics Centre Longitudinal Study                                                                             | 8.3  | M   | 19,756  | >20<br>(47)    | 353    | BAI, WC<br>(measured)                    |
| Park <sup>81</sup> , 2018             | Korea     | The Korean National Health Insurance Cohort (NHIS) study                                                       | 5    | W/M | 465,629 | >18            | 5469   | WC, WHtR,<br>ABSI<br>(measured)          |
| Petursson <sup>82</sup> , 2011        | Norway    | the Norwegian HUNT 2 Study                                                                                     | 12   | W/M | 62,223  | 20-79          | 5169   | WC, HC,<br>WHR, WHtR<br>(measured)       |
| Pischon <sup>83</sup> , 2008          | Europe    | the European Prospective Investigation into Cancer and Nutrition (EPIC)                                        | 9.7  | W/M | 359,387 | >18            | 14,723 | WC, WHR<br>(measured)                    |
| Price <sup>84</sup> , 2006            | UK        | Health and social assessment of older persons                                                                  | 5.9  | W/M | 14,833  | >75            | 6649   | WC, WHR<br>(measured)                    |
| Pujilestari <sup>85</sup> , 2019      | Indonesia | Collaboration Study on global AGEing and adult health (SAGE)                                                   | 3    | W/M | 10,997  | >50            | 981    | WC<br>(measured)                         |
| Reis <sup>86</sup> , 2009             | US        | the third National Health and Nutrition Examination Survey                                                     | 12   | W/M | 12,228  | 30-102<br>(55) | 2113   | WC, WHR,<br>WTR<br>(measured)            |
| Rost <sup>87</sup> , 2018             | Germany   | the German population based KORA (Cooperative Health Research in the Region of Augsburg) Augsburg cohort study | 15.4 | W/M | 13,307  | 25-74<br>(49)  | 2409   | WC, WHR,<br>WHtR, BAI<br>(measured)      |
| Saito <sup>88</sup> , 2012            | Japan     | Three Japanese Community-Based Studies                                                                         | 14.7 | W/M | 8026    | >40            | 1711   | WC<br>(measured)                         |
| Sardarina <sup>89</sup> , 2016        | Iran      | Tehran Lipid and Glucose Study                                                                                 | 10   | W/M | 9242    | >30            | 487    | WC, WHR,<br>WHtR, ABSI<br>(measured)     |
| Sato <sup>90</sup> , 2017             | Japan     | Japanese Specific Health Checkup program                                                                       | 4    | W/M | 132,647 | 40-74          | 1724   | WC, WHtR,<br>ABSI<br>(measured)          |

Supplementary Materials

|                                   |                    |                                                                                                |      |     |        |            |        |                                         |
|-----------------------------------|--------------------|------------------------------------------------------------------------------------------------|------|-----|--------|------------|--------|-----------------------------------------|
| Schneider <sup>91</sup> , 2010    | Germany            | Two German cohort studies, the DETECT study and SHIP                                           | 5.3  | W/M | 10,652 | 55         | 620    | WHR (measured)                          |
| Simpson <sup>92</sup> , 2007      | Australia          | Melbourne Collaborative Cohort Study                                                           | 11   | W/M | 41,313 | 27-75      | 2822   | WC, WHR (measured)                      |
| Singh <sup>93</sup> , 2018        | India and Pakistan | the Cardiometabolic Risk Reduction in South Asia Surveillance Study (CARRS Surveillance Study) | 3.2  | W/M | 16,287 | >20 (41)   | 320    | WC (measured)                           |
| Srikanthan <sup>94</sup> , 2009   | US                 | the MacArthur Successful Aging Study                                                           | 12   | W/M | 1189   | 70-79 (74) | 219    | WC, WHR (measured)                      |
| Staiano <sup>95</sup> , 2012      | Canada             | The Canadian Heart Health Survey Follow-Up Study                                               | 13   | W/M | 8061   | 18-74      | 887    | WC, WHR (measured)                      |
| Thomas <sup>96</sup> , 2011       | France             | the IPC Center cohort study                                                                    | 4.7  | W/M | 84,737 | >40 (53)   | 936    | WC (measured)                           |
| Thomson <sup>97</sup> , 2016      | US                 | the Women's Health Initiative                                                                  | 13.5 | W   | 77,505 | 63         | 10,761 | WC, HC, WHR, ABSI, BAI (measured)       |
| Tice <sup>98</sup> , 2006         | US                 | The Breast and Bone Follow-up Study of the Fracture Intervention Trial (B-FIT)                 | 9    | W   | 17,748 | 55-80 (68) | 1886   | WHR (measured)                          |
| Visscher <sup>99</sup> , 2001     | Netherlands        | The Rotterdam study                                                                            | 5.4  | W/M | 6296   | 55-102     | 479    | WC, WHR (measured) (nonlinear analysis) |
| Wannamethee <sup>100</sup> , 2007 | UK                 | The British Regional Heart Study                                                               | 6    | M   | 4107   | 60-79      | 713    | WC, WHR (measured)                      |
| Welborn <sup>101</sup> , 2007     | Australia          | National heart foundation risk factor prevalence study                                         | 11   | W/M | 9309   | 20-69      | 473    | WC, WHR, WHtR (measured)                |
| Wu <sup>102</sup> , 2017          | US                 | the National Health and Nutrition Examination Survey III                                       | 14.3 | W/M | 11,958 | 20-90      | 1081   | TC (measured)                           |
| Zhang <sup>103</sup> , 2008       | US                 | the Nurses' Health Study                                                                       | 16   | W   | 44,636 | 30-55      | 3507   | WC, WHR, HC (self-report)               |
| Zhao <sup>104</sup> , 2016        | Tobago             | the Tobago Health study                                                                        | 5.9  | M   | 1652   | 40-91      | 112    | WC (measured)                           |

## Supplementary Materials

ABSI, A body shape index; BAI, body adiposity index; HC, hip circumference; TC, thigh circumference; WC, waist circumference; WHR, waist-to-hip ratio; WHtR, waist-to-height ratio; WTR, waist-ti-thigh ratio



Supplementary Materials

**Table S3.** Reported risk estimates of all-cause mortality across categories of central obesity measures in primary studies.

| Exposure categories                                          | Effect size (95% CI) | Confounders                                                                                                                                                                                                                                |
|--------------------------------------------------------------|----------------------|--------------------------------------------------------------------------------------------------------------------------------------------------------------------------------------------------------------------------------------------|
| Adegbija, Australia's Northern Territory screening programme |                      |                                                                                                                                                                                                                                            |
| Waist circumference (cm)                                     |                      |                                                                                                                                                                                                                                            |
| 73.0 (median)                                                | 1.00                 | Age, tobacco smoking status, alcohol consumption, and BMI                                                                                                                                                                                  |
| 89.5                                                         | 1.26 (0.85-1.87)     |                                                                                                                                                                                                                                            |
| 115.5                                                        | 2.03 (1.22-3.39)     |                                                                                                                                                                                                                                            |
| Andersen, the Shanghai Men's Health Study                    |                      |                                                                                                                                                                                                                                            |
| Waist-to-hip ratio                                           |                      |                                                                                                                                                                                                                                            |
| <0.86                                                        | 1.00                 | Age, birth year, education, occupation, regular exercise, dietary intake of saturated fats, fruits and vegetables, alcohol consumption, height, smoking status, and BMI                                                                    |
| 0.86-0.89                                                    | 1.10 (0.95-1.27)     |                                                                                                                                                                                                                                            |
| 0.90-0.91                                                    | 1.21 (1.04-1.41)     |                                                                                                                                                                                                                                            |
| 0.92-0.94                                                    | 1.11 (0.96-1.30)     |                                                                                                                                                                                                                                            |
| >0.95                                                        | 1.42 (1.22-1.65)     |                                                                                                                                                                                                                                            |
| 1-SD increase, Never smokers                                 | 1.12 (1.02-1.22)     |                                                                                                                                                                                                                                            |
| 1-SD increase, Former smokers                                | 1.15 (1.03-1.28)     |                                                                                                                                                                                                                                            |
| 1-SD increase, Current smokers                               | 1.11 (1.04-1.19)     |                                                                                                                                                                                                                                            |
| Andersen, the Shanghai Women's Health Study                  |                      |                                                                                                                                                                                                                                            |
| Waist-to-hip ratio                                           |                      |                                                                                                                                                                                                                                            |
| <0.78                                                        | 1.00                 | Age, birth year, education, occupation, regular exercise, dietary intake of saturated fats, fruits and vegetables, alcohol consumption, height, menopausal status, smoking status, and BMI                                                 |
| 0.78-0.79                                                    | 1.10 (0.96-1.27)     |                                                                                                                                                                                                                                            |
| 0.80-0.82                                                    | 1.11 (0.97-1.27)     |                                                                                                                                                                                                                                            |
| 0.83-0.85                                                    | 1.20 (1.05-1.37)     |                                                                                                                                                                                                                                            |
| >0.86                                                        | 1.48 (1.30-1.69)     |                                                                                                                                                                                                                                            |
| 1-SD increase, Never smokers                                 | 1.15 (1.11-1.19)     |                                                                                                                                                                                                                                            |
| Baik, The Health Professionals Follow-up Study               |                      |                                                                                                                                                                                                                                            |
| Waist circumference (cm)                                     |                      |                                                                                                                                                                                                                                            |
| <87.6                                                        | 1.00                 | Age, smoking status, family history of myocardial infarction or colon cancer before age 60 years, profession, marital status, height, alcohol intake, and quintiles of calorie-adjusted intakes of vitamin A, vitamin E, and dietary fiber |
| 87.6-92.0                                                    | 0.98 (0.80-1.21)     |                                                                                                                                                                                                                                            |
| 92.0-96.3                                                    | 0.89 (0.72-1.12)     |                                                                                                                                                                                                                                            |
| 96.5-102.1                                                   | 1.07 (0.88-1.31)     |                                                                                                                                                                                                                                            |
| >102.4                                                       | 1.37 (1.12-1.67)     |                                                                                                                                                                                                                                            |
| Baik, The Health Professionals Follow-up Study               |                      |                                                                                                                                                                                                                                            |
| Hip circumference (cm)                                       |                      |                                                                                                                                                                                                                                            |

Supplementary Materials

|                                                                                      |                  |                                                                                                                                                                                                                                            |
|--------------------------------------------------------------------------------------|------------------|--------------------------------------------------------------------------------------------------------------------------------------------------------------------------------------------------------------------------------------------|
| <96.0                                                                                | 1.00             | Age, smoking status, family history of myocardial infarction or colon cancer before age 60 years, profession, marital status, height, alcohol intake, and quintiles of calorie-adjusted intakes of vitamin A, vitamin E, and dietary fiber |
| 96.0-98.8                                                                            | 1.00 (0.82-1.21) |                                                                                                                                                                                                                                            |
| 99.0-101.6                                                                           | 0.96 (0.82-1.12) |                                                                                                                                                                                                                                            |
| 101.8-106.4                                                                          | 0.76 (0.63-0.91) |                                                                                                                                                                                                                                            |
| >106.7                                                                               | 1.24 (1.06-1.44) |                                                                                                                                                                                                                                            |
| Baik, The Health Professionals Follow-up Study<br>Waist-to-hip ratio                 |                  |                                                                                                                                                                                                                                            |
| <0.90                                                                                | 1.00             | Age, smoking status, family history of myocardial infarction or colon cancer before age 60 years, profession, marital status, height, alcohol intake, and quintiles of calorie-adjusted intakes of vitamin A, vitamin E, and dietary fiber |
| 0.90-0.91                                                                            | 0.67 (0.52-0.87) |                                                                                                                                                                                                                                            |
| 0.90-0.94                                                                            | 0.88 (0.72-1.08) |                                                                                                                                                                                                                                            |
| 0.95-0.97                                                                            | 1.05 (0.87-1.27) |                                                                                                                                                                                                                                            |
| ≥0.98                                                                                | 1.15 (0.96-1.38) |                                                                                                                                                                                                                                            |
| Bellocco, the Swedish National March Cohort<br>Waist circumference (cm), Men         |                  |                                                                                                                                                                                                                                            |
| <94                                                                                  | 1.00             | Age at enrollment, physical activity, cigarette smoking status, alcohol drinking, use of vitamins and minerals, and educational level                                                                                                      |
| 94-102                                                                               | 0.97 (0.80-1.16) |                                                                                                                                                                                                                                            |
| >102                                                                                 | 1.30 (1.07-1.58) |                                                                                                                                                                                                                                            |
| Bellocco, the Swedish National March Cohort<br>Waist circumference (cm), Women       |                  |                                                                                                                                                                                                                                            |
| <80                                                                                  | 1.00             | Age at enrollment, physical activity, cigarette smoking status, alcohol drinking, use of vitamins and minerals, educational level in men, contraceptive pill use and hormone therapy replacement in women                                  |
| 80-88                                                                                | 1.32 (1.07-1.63) |                                                                                                                                                                                                                                            |
| >88                                                                                  | 1.35 (1.08-1.67) |                                                                                                                                                                                                                                            |
| Beleigoli, The Bambui Cohort Study of Ageing<br>Waist circumference (cm)             |                  |                                                                                                                                                                                                                                            |
| WC, 1 cm                                                                             | 1.00 (0.99-1.01) | Age, sex, smoking, Chagas disease, log-transformed creatinine, log-transformed BNP levels, major ECG abnormalities, physical activity within the last 90 days, household income, and education                                             |
| WC, 1 cm, Non-smokers                                                                | 1.00 (0.99-1.01) |                                                                                                                                                                                                                                            |
| WC, 1 cm, excluding deaths during first 5 years                                      | 0.99 (0.98-1.01) |                                                                                                                                                                                                                                            |
| Bigaard, Danish prospective study 'Diet, Cancer and Health<br>Hip circumference (cm) |                  |                                                                                                                                                                                                                                            |
| HC, Men, 10% increase (~10 cm)                                                       | 0.65 (0.58-0.74) | Age, smoking status, waist circumference, and BMI                                                                                                                                                                                          |
| HC, Women, 10% increase (~10 cm)                                                     | 0.75 (0.62-0.86) |                                                                                                                                                                                                                                            |
| Bombelli, the PAMELA study<br>Waist circumference                                    |                  |                                                                                                                                                                                                                                            |

Supplementary Materials

|                                                                                        |                  |                                                                                                                                                                           |
|----------------------------------------------------------------------------------------|------------------|---------------------------------------------------------------------------------------------------------------------------------------------------------------------------|
| WC, 1 cm                                                                               | 1.01 (1.00-1.02) | Age, gender, previous cardiovascular events, 24 h systolic blood pressure, total serum cholesterol, plasma glucose, cigarette smoking and antihypertensive drug treatment |
| Boggs, the Black Women's Health Study<br>Waist circumference (cm), education <12 years |                  |                                                                                                                                                                           |
| 66.0-76.0                                                                              | 1.00             | Age, questionnaire cycle, level of education, marital status, vigorous physical activity, alcohol intake, and BMI                                                         |
| 76.2-86.0                                                                              | 0.96 (0.55-1.67) |                                                                                                                                                                           |
| 86.3-96.3                                                                              | 1.10 (0.61-1.99) |                                                                                                                                                                           |
| 96.5-119.4                                                                             | 1.03 (0.53-2.01) |                                                                                                                                                                           |
| Boggs, the Black Women's Health Study<br>Waist circumference (cm), education >12 years |                  |                                                                                                                                                                           |
| 66.0-76.0                                                                              | 1.00             | Age, questionnaire cycle, level of education, marital status, vigorous physical activity, alcohol intake, and BMI                                                         |
| 76.2-86.0                                                                              | 1.12 (0.84-1.48) |                                                                                                                                                                           |
| 86.3-96.3                                                                              | 1.34 (0.97-1.85) |                                                                                                                                                                           |
| 96.5-119.4                                                                             | 1.33 (0.91-1.94) |                                                                                                                                                                           |
| Boggs, the Black Women's Health Study<br>Waist circumference (cm), Never smokers       |                  |                                                                                                                                                                           |
| 55.9-65.8                                                                              | 1.28 (0.84-1.94) | Age, follow-up cycle, education, marital status, vigorous physical activity, alcohol intake, pack-years of smoking (former and current smokers only), and BMI             |
| 66.0-70.9                                                                              | 1.00             |                                                                                                                                                                           |
| 71.0-75.9                                                                              | 1.05 (0.74-1.51) |                                                                                                                                                                           |
| 76.0-81.0                                                                              | 1.12 (0.77-1.62) |                                                                                                                                                                           |
| 81.2-86.1                                                                              | 1.15 (0.79-1.67) |                                                                                                                                                                           |
| 86.3-91.2                                                                              | 1.29 (0.88-1.90) |                                                                                                                                                                           |
| 91.4-96.2                                                                              | 1.41 (0.94-2.13) |                                                                                                                                                                           |
| 96.5-101.3                                                                             | 1.15 (0.73-1.79) |                                                                                                                                                                           |
| 101.6-119.4                                                                            | 1.40 (0.90-2.19) |                                                                                                                                                                           |
| Bowman, UK Biobank Study<br>Waist-to-hip ratio, normal weight only                     |                  |                                                                                                                                                                           |
| 0.825 (median)                                                                         | 1.00             | Age, sex, smoking history (never or former smoker), alcohol intake, and educational attainment                                                                            |
| 0.875                                                                                  | 1.28 (1.09-1.49) |                                                                                                                                                                           |
| 0.925                                                                                  | 1.33 (1.08-1.65) |                                                                                                                                                                           |
| Calori, the Cremona study<br>Waist circumference (cm)                                  |                  |                                                                                                                                                                           |
| WC, 1 cm                                                                               | 1.01 (0.99-1.02) | Age and sex                                                                                                                                                               |
| Cameron, the AusDiab study                                                             |                  |                                                                                                                                                                           |

Supplementary Materials

|                                                                                |                  |                                                                                                                                                                |
|--------------------------------------------------------------------------------|------------------|----------------------------------------------------------------------------------------------------------------------------------------------------------------|
| Waist circumference (cm), Men                                                  |                  |                                                                                                                                                                |
| <88.2                                                                          | 0.78 (0.46-1.32) | Age, self-reported history of cardiovascular disease (angina, myocardial infarction or stroke),self-reported cancer (excluding skin cancer) and smoking status |
| 88.2-94.2                                                                      | 1.00             |                                                                                                                                                                |
| 94.3-99.3                                                                      | 0.69 (0.43-1.09) |                                                                                                                                                                |
| 99.4-106.2                                                                     | 0.66 (0.42-1.02) |                                                                                                                                                                |
| >106.2                                                                         | 0.80 (0.52-1.24) |                                                                                                                                                                |
| Cameron, the AusDiab study<br>Waist circumference (cm), Women                  |                  |                                                                                                                                                                |
| <73.7                                                                          | 1.52 (0.82-2.85) | Age, self-reported history of cardiovascular disease (angina, myocardial infarction or stroke),self-reported cancer (excluding skin cancer) and smoking status |
| 73.7-80.3                                                                      | 1.00             |                                                                                                                                                                |
| 80.4-87.0                                                                      | 1.43 (0.82-2.48) |                                                                                                                                                                |
| 87.1-96.2                                                                      | 0.98 (0.60-1.76) |                                                                                                                                                                |
| >96.2                                                                          | 1.51 (0.88-2.56) |                                                                                                                                                                |
| Cameron, the AusDiab study<br>Waist-to-hip ratio, Men                          |                  |                                                                                                                                                                |
| <0.88                                                                          | 1.17 (0.57-2.23) | Age, self-reported history of cardiovascular disease (angina, myocardial infarction or stroke),self-reported cancer (excluding skin cancer) and smoking status |
| 0.88-0.91                                                                      | 1.00             |                                                                                                                                                                |
| 0.92-0.95                                                                      | 1.43 (0.81-2.41) |                                                                                                                                                                |
| 0.96-0.99                                                                      | 0.95 (0.53-1.70) |                                                                                                                                                                |
| >0.99                                                                          | 1.42 (0.83-2.33) |                                                                                                                                                                |
| Cameron, the AusDiab study<br>Waist-to-hip ratio, Women                        |                  |                                                                                                                                                                |
| <0.75                                                                          | 1.40 (0.69-2.70) | Age, self-reported history of cardiovascular disease (angina, myocardial infarction or stroke),self-reported cancer (excluding skin cancer) and smoking status |
| 0.75-0.79                                                                      | 1.00             |                                                                                                                                                                |
| 0.80-0.82                                                                      | 1.43 (0.78-2.53) |                                                                                                                                                                |
| 0.83-0.87                                                                      | 1.33 (0.73-2.28) |                                                                                                                                                                |
| >0.87                                                                          | 1.58 (0.89-2.70) |                                                                                                                                                                |
| Cohen, the Southern Community Cohort Study<br>Waist circumference (cm), Blacks |                  |                                                                                                                                                                |
| 85.50 (median)                                                                 | 1.00             | Age; sex; education; income; cigarette smoking; and alcohol consumption                                                                                        |
| 95.75                                                                          | 0.94 (0.55-1.60) |                                                                                                                                                                |
| 107.25                                                                         | 0.69 (0.39-1.22) |                                                                                                                                                                |
| 119.50                                                                         | 0.67 (0.37-1.22) |                                                                                                                                                                |
| Cohen, the Southern Community Cohort Study<br>Waist circumference (cm), Whites |                  |                                                                                                                                                                |

Supplementary Materials

|                                                                                   |                  |                                                                                                                                                                                                                          |
|-----------------------------------------------------------------------------------|------------------|--------------------------------------------------------------------------------------------------------------------------------------------------------------------------------------------------------------------------|
| 85.50 (median)                                                                    | 1.00             | Age; sex; education; income; cigarette smoking; and alcohol consumption                                                                                                                                                  |
| 95.75                                                                             | 1.66 (0.79-3.48) |                                                                                                                                                                                                                          |
| 107.25                                                                            | 1.03 (0.47-2.28) |                                                                                                                                                                                                                          |
| 119.50                                                                            | 2.09 (1.01-4.35) |                                                                                                                                                                                                                          |
| Cohen, the Southern Community Cohort Study<br>Waist-to-hip ratio, Blacks          |                  |                                                                                                                                                                                                                          |
| 0.845 (median)                                                                    | 1.00             | Age; sex; education; income; cigarette smoking; and alcohol consumption                                                                                                                                                  |
| 0.920                                                                             | 0.89 (0.49-1.64) |                                                                                                                                                                                                                          |
| 0.945                                                                             | 1.32 (0.76-2.30) |                                                                                                                                                                                                                          |
| 0.995                                                                             | 0.97 (0.53-1.79) |                                                                                                                                                                                                                          |
| Cohen, the Southern Community Cohort Study<br>Waist-to-hip ratio, Whites          |                  |                                                                                                                                                                                                                          |
| 0.845 (median)                                                                    | 1.00             | Age; sex; education; income; cigarette smoking; and alcohol consumption                                                                                                                                                  |
| 0.890                                                                             | 1.18 (0.56-2.48) |                                                                                                                                                                                                                          |
| 0.945                                                                             | 1.21 (0.58-2.50) |                                                                                                                                                                                                                          |
| 0.995                                                                             | 1.29 (0.63-2.63) |                                                                                                                                                                                                                          |
| Thomson, the Women's Health Initiative<br>Waist circumference (cm)                |                  |                                                                                                                                                                                                                          |
| 69.5 (median)                                                                     | 1.00             | Age, race/ethnicity, education, alcohol, smoking, energy intake, HEI-2005, moderate-strenuous physical activity, sedentary time, sleep, hormone replacement therapy, diabetes (yes/no), MI, and general health construct |
| 76.1                                                                              | 0.90 (0.84-0.96) |                                                                                                                                                                                                                          |
| 82.5                                                                              | 0.93 (0.87-0.99) |                                                                                                                                                                                                                          |
| 90.0                                                                              | 0.95 (0.89-1.02) |                                                                                                                                                                                                                          |
| 103                                                                               | 1.21 (1.13-1.29) |                                                                                                                                                                                                                          |
| Thomson, the Women's Health Initiative<br>Waist circumference (cm), Never smokers |                  |                                                                                                                                                                                                                          |
| 69.5 (median)                                                                     | 1.00             | Age, race/ethnicity, education, alcohol, energy intake, HEI-2005, moderate-strenuous physical activity, sedentary time, sleep, hormone replacement therapy, diabetes (yes/no), MI, and general health construct          |
| 76.1                                                                              | 0.88 (0.79-0.97) |                                                                                                                                                                                                                          |
| 82.5                                                                              | 0.91 (0.82-1.00) |                                                                                                                                                                                                                          |
| 90.0                                                                              | 1.03 (0.94-1.14) |                                                                                                                                                                                                                          |
| 103                                                                               | 1.31 (1.18-1.45) |                                                                                                                                                                                                                          |
| Thomson, the Women's Health Initiative<br>Hip circumference (cm)                  |                  |                                                                                                                                                                                                                          |
| 92 (median)                                                                       | 1.00             | Age, race/ethnicity, education, alcohol, smoking, energy intake, HEI-2005, moderate-strenuous physical activity, sedentary time, sleep, hormone replacement therapy, diabetes                                            |
| 98                                                                                | 0.92 (0.87-0.99) |                                                                                                                                                                                                                          |
| 103                                                                               | 0.90 (0.84-0.96) |                                                                                                                                                                                                                          |

Supplementary Materials

|                                                                                 |                  |                                                                                                                                                                                                                          |
|---------------------------------------------------------------------------------|------------------|--------------------------------------------------------------------------------------------------------------------------------------------------------------------------------------------------------------------------|
| 109                                                                             | 0.90 (0.85-0.97) | (yes/no), MI, and general health construct                                                                                                                                                                               |
| 120                                                                             | 1.13 (1.05-1.20) |                                                                                                                                                                                                                          |
| Thomson, the Women's Health Initiative<br>Hip circumference (cm), never smokers |                  |                                                                                                                                                                                                                          |
| 92 (median)                                                                     | 1.00             | Age, race/ethnicity, education, alcohol, energy intake, HEI-2005, moderate-strenuous physical activity, sedentary time, sleep, hormone replacement therapy, diabetes (yes/no), MI, and general health construct          |
| 98                                                                              | 1.01 (0.91-1.11) |                                                                                                                                                                                                                          |
| 103                                                                             | 0.99 (0.90-1.11) |                                                                                                                                                                                                                          |
| 109                                                                             | 0.98 (0.89-1.08) |                                                                                                                                                                                                                          |
| 120                                                                             | 1.30 (1.17-1.43) |                                                                                                                                                                                                                          |
| Thomson, the Women's Health Initiative<br>Waist-to-hip ratio                    |                  |                                                                                                                                                                                                                          |
| 0.72 (median)                                                                   | 1.00             | Age, race/ethnicity, education, alcohol, smoking, energy intake, HEI-2005, moderate-strenuous physical activity, sedentary time, sleep, hormone replacement therapy, diabetes (yes/no), MI, and general health construct |
| 0.76                                                                            | 0.96 (0.89-1.03) |                                                                                                                                                                                                                          |
| 0.80                                                                            | 1.00 (0.93-1.07) |                                                                                                                                                                                                                          |
| 0.84                                                                            | 1.04 (0.97-1.12) |                                                                                                                                                                                                                          |
| 0.90                                                                            | 1.20 (1.13-1.29) |                                                                                                                                                                                                                          |
| Thomson, the Women's Health Initiative<br>Waist-to-hip ratio, Never smokers     |                  |                                                                                                                                                                                                                          |
| 0.72 (median)                                                                   | 1.00             | Age, race/ethnicity, education, alcohol, energy intake, HEI-2005, moderate-strenuous physical activity, sedentary time, sleep, hormone replacement therapy, diabetes (yes/no), MI, and general health construct          |
| 0.76                                                                            | 0.90 (0.81-1.00) |                                                                                                                                                                                                                          |
| 0.80                                                                            | 0.96 (0.86-1.06) |                                                                                                                                                                                                                          |
| 0.84                                                                            | 1.06 (0.96-1.16) |                                                                                                                                                                                                                          |
| 0.90                                                                            | 1.16 (1.06-1.29) |                                                                                                                                                                                                                          |
| Thomson, the Women's Health Initiative<br>A body shape index                    |                  |                                                                                                                                                                                                                          |
| 0.068 (median)                                                                  | 1.00             | Age, race/ethnicity, education, alcohol, smoking, energy intake, HEI-2005, moderate-strenuous physical activity, sedentary time, sleep, hormone replacement therapy, diabetes (yes/no), MI, and general health construct |
| 0.071                                                                           | 1.00 (0.93-1.08) |                                                                                                                                                                                                                          |
| 0.074                                                                           | 1.05 (0.98-1.13) |                                                                                                                                                                                                                          |
| 0.076                                                                           | 1.10 (1.03-1.18) |                                                                                                                                                                                                                          |
| 0.081                                                                           | 1.37 (1.28-1.47) |                                                                                                                                                                                                                          |
| Thomson, the Women's Health Initiative<br>A body shape index, never smokers     |                  |                                                                                                                                                                                                                          |
| 0.068 (median)                                                                  | 1.00             | Age, race/ethnicity, education, alcohol, energy intake, HEI-2005, moderate-strenuous physical activity, sedentary time, sleep, hormone replacement therapy, diabetes (yes/no), MI,                                       |
| 0.071                                                                           | 0.98 (0.88-1.09) |                                                                                                                                                                                                                          |
| 0.074                                                                           | 1.06 (0.95-1.17) |                                                                                                                                                                                                                          |

Supplementary Materials

|                                                                                   |                  |                                                                                                                                                                                                                          |
|-----------------------------------------------------------------------------------|------------------|--------------------------------------------------------------------------------------------------------------------------------------------------------------------------------------------------------------------------|
| 0.076                                                                             | 1.11 (1.01-1.32) | and general health construct                                                                                                                                                                                             |
| 0.081                                                                             | 1.35 (1.22-1.49) |                                                                                                                                                                                                                          |
| Thomson, the Women's Health Initiative<br>Body adiposity index (%)                |                  |                                                                                                                                                                                                                          |
| 26.6 (median)                                                                     | 1.00             | Age, race/ethnicity, education, alcohol, smoking, energy intake, HEI-2005, moderate-strenuous physical activity, sedentary time, sleep, hormone replacement therapy, diabetes (yes/no), MI, and general health construct |
| 29.6                                                                              | 0.91 (0.85-0.97) |                                                                                                                                                                                                                          |
| 32.1                                                                              | 0.85 (0.80-0.91) |                                                                                                                                                                                                                          |
| 35.1                                                                              | 0.86 (0.81-0.92) |                                                                                                                                                                                                                          |
| 40.9                                                                              | 1.06 (0.99-1.13) |                                                                                                                                                                                                                          |
| Thomson, the Women's Health Initiative<br>Body adiposity index (%), Never smokers |                  |                                                                                                                                                                                                                          |
| 26.6 (median)                                                                     | 1.00             | Age, race/ethnicity, education, alcohol, energy intake, HEI-2005, moderate-strenuous physical activity, sedentary time, sleep, hormone replacement therapy, diabetes (yes/no), MI, and general health construct          |
| 29.6                                                                              | 0.94 (0.85-1.04) |                                                                                                                                                                                                                          |
| 32.1                                                                              | 0.89 (0.80-0.98) |                                                                                                                                                                                                                          |
| 35.1                                                                              | 0.90 (0.82-1.00) |                                                                                                                                                                                                                          |
| 40.9                                                                              | 1.16 (1.05-1.28) |                                                                                                                                                                                                                          |
| Dhana, The Rotterdam Study<br>Waist circumference (cm)                            |                  |                                                                                                                                                                                                                          |
| WC, Men, 1-SD increase                                                            | 1.02 (0.97-1.07) | Age, current smoking, systolic blood pressure, medication for hypertension, diabetes mellitus, total cholesterol and high-density lipoprotein cholesterol                                                                |
| WC, Women, 1-SD increase                                                          | 1.02 (0.98-1.07) |                                                                                                                                                                                                                          |
| Dhana, The Rotterdam Study<br>Waist-to-hip ratio                                  |                  |                                                                                                                                                                                                                          |
| WHR, Men, 1-SD increase                                                           | 1.07 (1.01-1.12) | Age, current smoking, systolic blood pressure, medication for hypertension, diabetes mellitus, total cholesterol and high-density lipoprotein cholesterol                                                                |
| WHR, Women, 1-SD increase                                                         | 1.02 (0.98-1.07) |                                                                                                                                                                                                                          |
| Dhana, The Rotterdam Study<br>Waist-to-height ratio                               |                  |                                                                                                                                                                                                                          |
| WHtR, Men, 1-SD increase                                                          | 1.03 (0.98-1.08) | Age, current smoking, systolic blood pressure, medication for hypertension, diabetes mellitus, total cholesterol and high-density lipoprotein cholesterol                                                                |
| WHtR, Women, 1-SD increase                                                        | 1.02 (0.98-1.06) |                                                                                                                                                                                                                          |
| Dhana, The Rotterdam Study<br>A body shape index                                  |                  |                                                                                                                                                                                                                          |
| ABSI, Men, 1-SD increase                                                          | 1.15 (1.09-1.21) | Age, current smoking, systolic blood pressure, medication for hypertension, diabetes mellitus, total cholesterol and high-density lipoprotein cholesterol                                                                |
| ABSI, Women, 1-SD increase                                                        | 1.09 (1.04-1.14) |                                                                                                                                                                                                                          |

Supplementary Materials

|                                                                                      |                  |                                                                                                                                                 |
|--------------------------------------------------------------------------------------|------------------|-------------------------------------------------------------------------------------------------------------------------------------------------|
| Dolan, Study of Osteoporotic Fractures<br>Waist circumference (cm), all participants |                  |                                                                                                                                                 |
| <74.1                                                                                | 1.00             | Age, self-reported health, grip strength, nonthiazide diuretic use, and femoral neck bone mineral density                                       |
| 74.1-80.0                                                                            | 0.87 (0.69-1.09) |                                                                                                                                                 |
| 80.0-85.7                                                                            | 0.93 (0.75-1.17) |                                                                                                                                                 |
| 85.7-93.4                                                                            | 1.10 (0.88-1.36) |                                                                                                                                                 |
| >93.4                                                                                | 1.18 (0.94-1.47) |                                                                                                                                                 |
| Dolan, Study of Osteoporotic Fractures<br>Waist circumference (cm), Never smokers    |                  |                                                                                                                                                 |
| <74.1                                                                                | 1.00             | Age, self-reported health, grip strength, nonthiazide diuretic use, and femoral neck bone mineral density                                       |
| 74.1-80.0                                                                            | 1.05 (0.78-1.42) |                                                                                                                                                 |
| 80.0-85.7                                                                            | 0.88 (0.64-1.22) |                                                                                                                                                 |
| 85.7-93.4                                                                            | 1.14 (0.84-1.53) |                                                                                                                                                 |
| >93.4                                                                                | 1.28 (0.94-1.75) |                                                                                                                                                 |
| Danon-hersch, The Lc65+ COHORT<br>Waist circumference (cm)                           |                  |                                                                                                                                                 |
| 74.00 (median)                                                                       | 0.75 (0.43-1.29) | Sex, age at first visit, education, financial difficulties, involuntary weight loss; smoking status; and financial difficulties were considered |
| 87.25                                                                                | 1.00             |                                                                                                                                                 |
| 95.70                                                                                | 0.69 (0.38-1.22) |                                                                                                                                                 |
| 100.50                                                                               | 0.59 (0.32-1.09) |                                                                                                                                                 |
| 126.50                                                                               | 1.36 (0.82-2.26) |                                                                                                                                                 |
| Folsom, The Iowa Women's Health Study<br>Waist circumference (cm)                    |                  |                                                                                                                                                 |
| <74.3                                                                                | 1.00             | Age                                                                                                                                             |
| 74.3-80.0                                                                            | 0.99 (0.90-1.10) |                                                                                                                                                 |
| 80.0-87.3                                                                            | 0.90 (0.80-1.00) |                                                                                                                                                 |
| 87.3-96.0                                                                            | 0.93 (0.80-1.10) |                                                                                                                                                 |
| >96.0                                                                                | 1.30 (1.10-1.50) |                                                                                                                                                 |
| Folsom, The Iowa Women's Health Study<br>Waist-to-hip ratio                          |                  |                                                                                                                                                 |
| <0.76                                                                                | 1.00             | Age                                                                                                                                             |
| 0.76-0.81                                                                            | 1.10 (0.90-1.20) |                                                                                                                                                 |
| 0.81-0.85                                                                            | 1.20 (1.10-1.40) |                                                                                                                                                 |
| 0.85-0.91                                                                            | 1.30 (1.20-1.50) |                                                                                                                                                 |
| >0.91                                                                                | 1.50 (1.40-1.80) |                                                                                                                                                 |



Supplementary Materials

|                                                     |                   |                                                                                                                                                                                                                                                                                                                                                                                      |
|-----------------------------------------------------|-------------------|--------------------------------------------------------------------------------------------------------------------------------------------------------------------------------------------------------------------------------------------------------------------------------------------------------------------------------------------------------------------------------------|
| Grant, The North West Adelaide Health Study (NWAHS) |                   |                                                                                                                                                                                                                                                                                                                                                                                      |
| Waist circumference (cm)                            |                   |                                                                                                                                                                                                                                                                                                                                                                                      |
| 83.5 (median)                                       | 1.00              | Age, marital status, work status, annual gross household income, highest educational qualification achieved, country of birth and health-related risk factors (smoking, alcohol risk, physical activity level, high blood pressure, high total blood cholesterol, high triglycerides, high glycated haemoglobin, and parental history of disease-diabetes, heart disease and stroke) |
| 90.5                                                | 0.87 (0.66-1.15)  |                                                                                                                                                                                                                                                                                                                                                                                      |
| 98.0                                                | 1.06 (0.82-1.38)  |                                                                                                                                                                                                                                                                                                                                                                                      |
| Grant, The North West Adelaide Health Study (NWAHS) |                   |                                                                                                                                                                                                                                                                                                                                                                                      |
| A body shape index                                  |                   |                                                                                                                                                                                                                                                                                                                                                                                      |
| ABSI, continuous                                    | 1.32 (1.18-1.48)  | Age, marital status, work status, annual gross household income, highest educational qualification achieved, country of birth and health-related risk factors (smoking, alcohol risk, physical activity level, high blood pressure, high total blood cholesterol, high triglycerides, high glycated haemoglobin, and parental history of disease-diabetes, heart disease and stroke) |
| Guallar-Castillón, Spanish population-based cohort  |                   |                                                                                                                                                                                                                                                                                                                                                                                      |
| Waist circumference (cm)                            |                   |                                                                                                                                                                                                                                                                                                                                                                                      |
| 85.0 (mean)                                         | 1.00              | Sex, age, education, smoking (never smoker, ex-smoker, current, alcohol consumption, leisure-time physical activity, chronic obstructive lung disease, cancer in any site, untreated cataracts, depression requiring treatment, dementia, SF-36 mental summary component, and BMI)                                                                                                   |
| 95.8                                                | 1.00 (0.76-1.30)  |                                                                                                                                                                                                                                                                                                                                                                                      |
| 102.7                                               | 1.28 (0.98-1.66)  |                                                                                                                                                                                                                                                                                                                                                                                      |
| 113.9                                               | 1.48 (1.07-2.05)  |                                                                                                                                                                                                                                                                                                                                                                                      |
| He, Chengdu cohort study                            |                   |                                                                                                                                                                                                                                                                                                                                                                                      |
| A body shape index                                  |                   |                                                                                                                                                                                                                                                                                                                                                                                      |
| <0.0712                                             | 2.32 (0.59-9.09)  | Age, BMI, SBP, DBP, and smoking status                                                                                                                                                                                                                                                                                                                                               |
| 0.0713-0.0735                                       | 1.67 (0.40-7.03)  |                                                                                                                                                                                                                                                                                                                                                                                      |
| 0.0736-0.0759                                       | 4.02 (1.00-15.78) |                                                                                                                                                                                                                                                                                                                                                                                      |
| 0.0760-0.0781                                       | 2.49 (0.60-10.30) |                                                                                                                                                                                                                                                                                                                                                                                      |
| ≥0.0782                                             | 1.00              |                                                                                                                                                                                                                                                                                                                                                                                      |
| Heitmann, the Danish MONICA study (men only)        |                   |                                                                                                                                                                                                                                                                                                                                                                                      |
| Hip circumference (cm), Men                         |                   |                                                                                                                                                                                                                                                                                                                                                                                      |
| 91.3 (mean)                                         | 1.00              | BMI, waist circumference, smoking status, and physical activity at baseline                                                                                                                                                                                                                                                                                                          |
| 96.4                                                | 0.88 (0.61-1.27)  |                                                                                                                                                                                                                                                                                                                                                                                      |
| 100.4                                               | 0.72 (0.47-1.10)  |                                                                                                                                                                                                                                                                                                                                                                                      |
| 107.4                                               | 0.79 (0.46-1.36)  |                                                                                                                                                                                                                                                                                                                                                                                      |

Supplementary Materials

|                                              |                  |                                                                                                       |
|----------------------------------------------|------------------|-------------------------------------------------------------------------------------------------------|
| Heitmann, the Danish MONICA study (men only) |                  |                                                                                                       |
| Thigh circumference (cm), Men                |                  |                                                                                                       |
| <46.5                                        | 2.53 (1.74-3.69) | Smoking, physical activity, education, body height, body fat percentage, waist circumference, and BMI |
| 46.5-48.0                                    | 2.11 (1.54-2.89) |                                                                                                       |
| 48.0-49.5                                    | 1.76 (1.34-2.32) |                                                                                                       |
| 49.5-52.0                                    | 1.32 (1.07-1.64) |                                                                                                       |
| 52.0-55.0                                    | 1.00             |                                                                                                       |
| 55.0-58.0                                    | 0.81 (0.66-1.01) |                                                                                                       |
| 58.0-61.0                                    | 0.70 (0.48-1.03) |                                                                                                       |
| 61.0-63.0                                    | 0.64 (0.36-1.14) |                                                                                                       |
| >64.0                                        | 0.62 (0.31-1.23) |                                                                                                       |
| Heitmann, the Danish MONICA study (men only) |                  |                                                                                                       |
| Thigh circumference (cm), Women              |                  |                                                                                                       |
| <46.0                                        | 2.73 (1.38-5.41) | Smoking, physical activity, education, body height, body fat percentage, waist circumference, and BMI |
| 46.0-48.0                                    | 2.35 (1.42-3.90) |                                                                                                       |
| 48.0-49.5                                    | 2.10 (1.42-3.11) |                                                                                                       |
| 49.5-52.0                                    | 1.67 (1.28-2.17) |                                                                                                       |
| 52.0-55.5                                    | 1.00             |                                                                                                       |
| 55.5-59.5                                    | 0.59 (0.42-0.83) |                                                                                                       |
| 59.5-63.5                                    | 0.53 (0.32-0.86) |                                                                                                       |
| 63.5-66.5                                    | 0.56 (0.29-1.11) |                                                                                                       |
| >68.5                                        | 0.59 (0.25-1.39) |                                                                                                       |
| Hotchkiss, Scottish Health Survey            |                  |                                                                                                       |
| Waist circumference (cm), Men                |                  |                                                                                                       |
| <79                                          | 1.89 (1.41-2.53) | Age, smoking status, alcohol consumption and year of survey                                           |
| 79-94                                        | 1.00             |                                                                                                       |
| 94-102                                       | 0.90 (0.73-1.11) |                                                                                                       |
| ≥102                                         | 1.10 (0.90-1.33) |                                                                                                       |
| Hotchkiss, Scottish Health Survey            |                  |                                                                                                       |
| Waist circumference (cm), Women              |                  |                                                                                                       |
| <79                                          | 1.57 (1.13-2.19) | Age, smoking status, alcohol consumption and year of survey                                           |
| 79-94                                        | 1.00             |                                                                                                       |
| 94-102                                       | 1.05 (0.83-1.33) |                                                                                                       |
| ≥102                                         | 1.20 (0.97-1.47) |                                                                                                       |
| Hotchkiss, Scottish Health Survey            |                  |                                                                                                       |

Supplementary Materials

|                                                                                                                  |                  |                                                                                                                         |
|------------------------------------------------------------------------------------------------------------------|------------------|-------------------------------------------------------------------------------------------------------------------------|
| Waist-to-hip ratio, Men                                                                                          |                  |                                                                                                                         |
| <0.65                                                                                                            | 1.04 (0.77-1.39) | Age, smoking status, alcohol consumption and year of survey                                                             |
| 0.80-0.90                                                                                                        | 1.00             |                                                                                                                         |
| 0.90-1.00                                                                                                        | 0.97 (0.80-1.18) |                                                                                                                         |
| ≥1.00                                                                                                            | 1.29 (1.04-1.60) |                                                                                                                         |
| Hotchkiss, Scottish Health Survey<br>Waist-to-hip ratio, Women                                                   |                  |                                                                                                                         |
| <0.65                                                                                                            | 1.72 (0.99-2.98) | Age, smoking status, alcohol consumption and year of survey                                                             |
| 0.80-0.90                                                                                                        | 1.00             |                                                                                                                         |
| 0.90-1.00                                                                                                        | 1.41 (1.13-1.76) |                                                                                                                         |
| ≥1.00                                                                                                            | 1.56 (1.26-1.94) |                                                                                                                         |
| Howell, The National Health and Nutrition Examination Survey (NHANES) III and 1999-2010<br>Waist-to-height ratio |                  |                                                                                                                         |
| WHtR, per 0.05 unit increase, all participants                                                                   | 1.08 (1.03-1.14) | Age, gender and smoking status                                                                                          |
| WHtR, per 0.05 unit increase, men                                                                                | 1.05 (0.97-1.12) |                                                                                                                         |
| WHtR, per 0.05 unit increase, women                                                                              | 1.11 (1.04-1.18) |                                                                                                                         |
| Hu, Dongfeng-Tongji cohort<br>Waist circumference (cm)                                                           |                  |                                                                                                                         |
| 73.65 (median)                                                                                                   | 1.00             | Age, sex, drinking status, smoking index, physical activity, family history of cardio-cerebrovascular diseases, and BMI |
| 78.5                                                                                                             | 1.05 (0.91-1.21) |                                                                                                                         |
| 85.0                                                                                                             | 1.09 (0.93-1.27) |                                                                                                                         |
| 88.5                                                                                                             | 1.29 (1.10-1.51) |                                                                                                                         |
| 94                                                                                                               | 1.58 (1.33-1.89) |                                                                                                                         |
| Hu, Dongfeng-Tongji cohort<br>Waist-to-hip ratio                                                                 |                  |                                                                                                                         |
| 0.445 (median)                                                                                                   | 1.00             | Age, sex, drinking status, smoking index, physical activity, family history of cardio-cerebrovascular diseases, and BMI |
| 0.485                                                                                                            | 1.06 (0.92-1.23) |                                                                                                                         |
| 0.520                                                                                                            | 1.16 (0.99-1.35) |                                                                                                                         |
| 0.550                                                                                                            | 1.41 (1.20-1.66) |                                                                                                                         |
| 0.590                                                                                                            | 1.81 (1.51-2.17) |                                                                                                                         |
| Jacobs, The Cancer Prevention Study-II Nutrition Cohort<br>Waist circumference (cm), Men,                        |                  |                                                                                                                         |
| <90                                                                                                              | 1.00             | Age, race, educational level, marital status, smoking status, alcohol use, height, physical activity, and BMI           |
| 90-95                                                                                                            | 1.15 (1.06-1.24) |                                                                                                                         |
| 95-100                                                                                                           | 1.11 (1.03-1.21) |                                                                                                                         |

Supplementary Materials

|                                                                                            |                  |                                                                                                                                |
|--------------------------------------------------------------------------------------------|------------------|--------------------------------------------------------------------------------------------------------------------------------|
| 100-105                                                                                    | 1.32 (1.21-1.44) |                                                                                                                                |
| 105-110                                                                                    | 1.38 (1.25-1.53) |                                                                                                                                |
| 110-115                                                                                    | 1.55 (1.38-1.75) |                                                                                                                                |
| 115-120                                                                                    | 1.80 (1.55-2.09) |                                                                                                                                |
| >120                                                                                       | 2.02 (1.71-2.39) |                                                                                                                                |
| Jacobs, The Cancer Prevention Study-II Nutrition Cohort<br>Waist circumference (cm), Women |                  |                                                                                                                                |
| <75                                                                                        | 1.00             | Age, race, educational level, marital status, smoking status, alcohol use, height, hormone therapy, physical activity, and BMI |
| 75-80                                                                                      | 1.24 (1.11-1.38) |                                                                                                                                |
| 80-85                                                                                      | 1.17 (1.05-1.31) |                                                                                                                                |
| 85-90                                                                                      | 1.48 (1.32-1.67) |                                                                                                                                |
| 90-95                                                                                      | 1.47 (1.29-1.67) |                                                                                                                                |
| 95-100                                                                                     | 1.68 (1.46-1.93) |                                                                                                                                |
| 100-105                                                                                    | 1.74 (1.49-2.03) |                                                                                                                                |
| 105-110                                                                                    | 1.98 (1.66-2.36) |                                                                                                                                |
| >110                                                                                       | 2.36 (1.98-2.82) |                                                                                                                                |
| Janssen, Cardiovascular Health Study<br>Waist circumference (cm)                           |                  |                                                                                                                                |
| 1-SD increase, all participants                                                            | 1.12 (1.02-1.22) | Age, sex, race, smoking status, physical activity level, BMI, and socioeconomic status                                         |
| 1-SD increase, Men                                                                         | 1.19 (1.02-1.40) |                                                                                                                                |
| 1-SD increase, Women                                                                       | 1.07 (0.95-1.20) |                                                                                                                                |
| 1-SD increase, Without diseases as baseline                                                | 1.04 (0.91-1.20) |                                                                                                                                |
| Kahn, The National Health and Nutrition Examination Survey (NHANES) III<br>Men             |                  |                                                                                                                                |
| WC, 1-SD increase (cm)                                                                     | 1.27 (1.06-1.45) | Age, age <sup>2</sup> , black ancestry, tobacco exposure, and income ,200% of poverty threshold                                |
| WHR, 1-SD increase                                                                         | 1.27 (1.09-1.48) |                                                                                                                                |
| WHtR, 1-SD increase                                                                        | 1.33 (1.11-1.59) |                                                                                                                                |
| WTR, 1-SD increase                                                                         | 1.43 (1.20-1.71) |                                                                                                                                |
| Kahn, The National Health and Nutrition Examination Survey (NHANES) III<br>Women           |                  |                                                                                                                                |
| WC, 1-SD increase (cm)                                                                     | 1.65 (1.31-2.08) | Age, black ancestry, tobacco exposure, and education, high school graduation                                                   |
| WHR, 1-SD increase                                                                         | 2.33 (1.81-3.00) |                                                                                                                                |
| WHtR, 1-SD increase                                                                        | 1.63 (1.24-2.14) |                                                                                                                                |
| WTR, 1-SD increase                                                                         | 2.23 (1.69-2.93) |                                                                                                                                |
| Kalmijn, The Honolulu Heart Program                                                        |                  |                                                                                                                                |

Supplementary Materials

|                                                                                                              |                  |                                                                                                                                                                                                                                            |
|--------------------------------------------------------------------------------------------------------------|------------------|--------------------------------------------------------------------------------------------------------------------------------------------------------------------------------------------------------------------------------------------|
| Waist-to-hip ratio                                                                                           |                  |                                                                                                                                                                                                                                            |
| 0.73-0.90                                                                                                    | 1.00             | Age, years of standard education, physical activity index, alcohol consumption, number of cigarettes/d, systolic blood pressure, diastolic blood pressure, serum total cholesterol level, fasting serum glucose and insulin concentrations |
| 0.90-0.93                                                                                                    | 0.90 (0.70-1.10) |                                                                                                                                                                                                                                            |
| 0.93-0.96                                                                                                    | 0.80 (0.60-1.00) |                                                                                                                                                                                                                                            |
| 0.96-0.99                                                                                                    | 0.90 (0.70-1.10) |                                                                                                                                                                                                                                            |
| 0.99-1.27                                                                                                    | 1.00 (0.80-1.30) |                                                                                                                                                                                                                                            |
| Kalmijn, The Honolulu Heart Program<br>Waist-to-hip ratio, excluding ever smokers and early deaths           |                  |                                                                                                                                                                                                                                            |
| 0.73-0.90                                                                                                    | 1.00             | Age, years of standard education, physical activity index, alcohol consumption, number of cigarettes/d, systolic blood pressure, diastolic blood pressure, serum total cholesterol level, fasting serum glucose and insulin concentrations |
| 0.90-0.93                                                                                                    | 1.10 (0.70-1.70) |                                                                                                                                                                                                                                            |
| 0.93-0.96                                                                                                    | 1.00 (0.60-1.60) |                                                                                                                                                                                                                                            |
| 0.96-0.99                                                                                                    | 1.10 (0.70-1.70) |                                                                                                                                                                                                                                            |
| 0.99-1.27                                                                                                    | 1.20 (0.70-1.90) |                                                                                                                                                                                                                                            |
| Katzmarzyk, The Pennington Center Longitudinal Study<br>White Americans, all participants                    |                  |                                                                                                                                                                                                                                            |
| WC, 1-SD increase (cm)                                                                                       | 1.41 (1.25-1.60) | Age, sex, exam year, study code, smoking, alcohol consumption and exercise as covariates                                                                                                                                                   |
| WHR, 1-SD increase                                                                                           | 1.40 (1.23-1.61) |                                                                                                                                                                                                                                            |
| WHtR, 1-SD increase                                                                                          | 1.46 (1.28-1.65) |                                                                                                                                                                                                                                            |
| BAI, 1-SD increase (%)                                                                                       | 1.34 (1.17-1.53) |                                                                                                                                                                                                                                            |
| Katzmarzyk, The Pennington Center Longitudinal Study<br>White Americans, without CVD or cancer at baseline   |                  |                                                                                                                                                                                                                                            |
| WC, 1-SD increase (cm)                                                                                       | 1.38 (1.21-1.58) | Age, sex, exam year, study code, smoking, alcohol consumption and exercise as covariates                                                                                                                                                   |
| WHR, 1-SD increase                                                                                           | 1.41 (1.23-1.62) |                                                                                                                                                                                                                                            |
| WHtR, 1-SD increase                                                                                          | 1.44 (1.27-1.64) |                                                                                                                                                                                                                                            |
| BAI, 1-SD increase (%)                                                                                       | 1.33 (1.15-1.52) |                                                                                                                                                                                                                                            |
| Katzmarzyk, The Pennington Center Longitudinal Study<br>African Americans, all participants                  |                  |                                                                                                                                                                                                                                            |
| WC, 1-SD increase (cm)                                                                                       | 1.18 (0.97-1.45) | Age, sex, exam year, study code, smoking, alcohol consumption and exercise as covariates                                                                                                                                                   |
| WHR, 1-SD increase                                                                                           | 1.06 (0.98-1.16) |                                                                                                                                                                                                                                            |
| WHtR, 1-SD increase                                                                                          | 1.12 (0.92-1.37) |                                                                                                                                                                                                                                            |
| BAI, 1-SD increase (%)                                                                                       | 0.93 (0.74-1.16) |                                                                                                                                                                                                                                            |
| Katzmarzyk, The Pennington Center Longitudinal Study<br>African Americans, without CVD or cancer at baseline |                  |                                                                                                                                                                                                                                            |
| WC, 1-SD increase (cm)                                                                                       | 1.23 (1.00-1.51) | Age, sex, exam year, study code, smoking, alcohol consumption and exercise as covariates                                                                                                                                                   |
| WHR, 1-SD increase                                                                                           | 1.06 (0.98-1.16) |                                                                                                                                                                                                                                            |

Supplementary Materials

|                                                                                                |                  |                                                                                                              |
|------------------------------------------------------------------------------------------------|------------------|--------------------------------------------------------------------------------------------------------------|
| WHtR, 1-SD increase                                                                            | 1.16 (0.94-1.43) |                                                                                                              |
| BAI, 1-SD increase (%)                                                                         | 0.97 (0.77-1.23) |                                                                                                              |
| Klingberg, the Danish MONICA study and the Prospective Population Study of Women in Gothenburg |                  |                                                                                                              |
| Waist circumference (cm)                                                                       |                  |                                                                                                              |
| <67.5                                                                                          | 1.00             | BMI, age, education, leisure-time physical activity, smoking status, menopausal status, and cohort           |
| 68.0-72.0                                                                                      | 1.01 (0.80-1.30) |                                                                                                              |
| 72.5-76.0                                                                                      | 1.28 (0.99-1.64) |                                                                                                              |
| 76.5-82.0                                                                                      | 1.52 (1.14-2.02) |                                                                                                              |
| >82.5                                                                                          | 2.30 (1.60-3.30) |                                                                                                              |
| WC, 5 cm increase                                                                              | 1.20 (1.12-1.28) |                                                                                                              |
| Koster, the NIH-AARP Diet and Health Study                                                     |                  |                                                                                                              |
| Waist circumference (cm), Men                                                                  |                  |                                                                                                              |
| <88.9                                                                                          | 1.10 (1.04-1.16) | Age, racial/ethnic group, education, smoking status, physical activity, alcohol consumption, height, and BMI |
| 90.0-94.0                                                                                      | 1.00             |                                                                                                              |
| 94.0-99.1                                                                                      | 1.00 (0.95-1.05) |                                                                                                              |
| 99.1-106.7                                                                                     | 1.01 (0.96-1.07) |                                                                                                              |
| >106.7                                                                                         | 1.22 (1.15-1.29) |                                                                                                              |
| Koster, the NIH-AARP Diet and Health Study                                                     |                  |                                                                                                              |
| Waist circumference (cm), Men, With no prevalent disease at baseline                           |                  |                                                                                                              |
| <88.9                                                                                          | 1.15 (1.07-1.23) | Age, racial/ethnic group, education, smoking status, physical activity, alcohol consumption, height, and BMI |
| 90.0-94.0                                                                                      | 1.00             |                                                                                                              |
| 94.0-99.1                                                                                      | 1.00 (0.93-1.07) |                                                                                                              |
| 99.1-106.7                                                                                     | 1.01 (0.94-1.09) |                                                                                                              |
| >106.7                                                                                         | 1.13 (1.04-1.23) |                                                                                                              |
| Koster, the NIH-AARP Diet and Health Study                                                     |                  |                                                                                                              |
| Waist circumference (cm), Men, Never smokers                                                   |                  |                                                                                                              |
| <88.9                                                                                          | 1.00 (0.89-1.12) | Age, racial/ethnic group, education, smoking status, physical activity, alcohol consumption, height, and BMI |
| 90.0-94.0                                                                                      | 1.00             |                                                                                                              |
| 94.0-99.1                                                                                      | 0.97 (0.87-1.08) |                                                                                                              |
| 99.1-106.7                                                                                     | 0.95 (0.85-1.07) |                                                                                                              |
| >106.7                                                                                         | 1.02 (0.89-1.17) |                                                                                                              |
| Koster, the NIH-AARP Diet and Health Study                                                     |                  |                                                                                                              |
| Waist circumference (cm), Women                                                                |                  |                                                                                                              |
| <73.7                                                                                          | 1.07 (0.99-1.17) | Age, racial/ethnic group, education, smoking status, physical activity, alcohol consumption, height, and BMI |
| 73.7-80.0                                                                                      | 1.00             |                                                                                                              |

Supplementary Materials

|                                                                                                                      |                  |                                                                                                              |
|----------------------------------------------------------------------------------------------------------------------|------------------|--------------------------------------------------------------------------------------------------------------|
| 80.0-87.0                                                                                                            | 0.99 (0.91-1.07) |                                                                                                              |
| 87.0-95.9                                                                                                            | 1.00 (0.92-1.09) |                                                                                                              |
| >95.9                                                                                                                | 1.28 (1.16-1.41) |                                                                                                              |
| Koster, the NIH-AARP Diet and Health Study<br>Waist circumference (cm), Women, With no prevalent disease at baseline |                  |                                                                                                              |
| <73.7                                                                                                                | 1.06 (0.95-1.17) | Age, racial/ethnic group, education, smoking status, physical activity, alcohol consumption, height, and BMI |
| 73.7-80.0                                                                                                            | 1.00             |                                                                                                              |
| 80.0-87.0                                                                                                            | 0.98 (0.88-1.08) |                                                                                                              |
| 87.0-95.9                                                                                                            | 1.00 (0.89-1.12) |                                                                                                              |
| >95.9                                                                                                                | 1.24 (1.08-1.41) |                                                                                                              |
| Koster, the NIH-AARP Diet and Health Study<br>Waist circumference (cm), Women, Never smokers                         |                  |                                                                                                              |
| <73.7                                                                                                                | 1.06 (0.91-1.24) | Age, racial/ethnic group, education, smoking status, physical activity, alcohol consumption, height, and BMI |
| 73.7-80.0                                                                                                            | 1.00             |                                                                                                              |
| 80.0-87.0                                                                                                            | 1.01 (0.87-1.16) |                                                                                                              |
| 87.0-95.9                                                                                                            | 0.97 (0.83-1.14) |                                                                                                              |
| >95.9                                                                                                                | 1.35 (1.13-1.61) |                                                                                                              |
| Krakauer, NHANES 1999-2004<br>Waist circumference (cm)                                                               |                  |                                                                                                              |
| <82                                                                                                                  | 1.51 (1.12-2.03) | Sex, ethnicity, smoking, presence of diabetes, blood pressure, and serum cholesterol                         |
| 82-90                                                                                                                | 1.31 (0.92-1.87) |                                                                                                              |
| 90-97                                                                                                                | 1.00             |                                                                                                              |
| 97-107                                                                                                               | 1.30 (0.95-1.77) |                                                                                                              |
| >107                                                                                                                 | 1.72 (1.28-2.32) |                                                                                                              |
| 1-SD increase                                                                                                        | 1.05 (0.94-1.17) |                                                                                                              |
| Krakauer, NHANES 1999-2004<br>A body shape index                                                                     |                  |                                                                                                              |
| <0.0762                                                                                                              | 0.97 (0.69-1.37) | Sex, ethnicity, smoking, presence of diabetes, blood pressure, and serum cholesterol                         |
| 0.076-0.079                                                                                                          | 0.93 (0.64-1.35) |                                                                                                              |
| 0.079-0.082                                                                                                          | 1.00             |                                                                                                              |
| 0.082-0.085                                                                                                          | 1.46 (1.08-1.99) |                                                                                                              |
| >0.085                                                                                                               | 1.93 (1.39-2.68) |                                                                                                              |
| 1-SD increase                                                                                                        | 1.30 (1.16-1.44) |                                                                                                              |
| Krakauer, the British Health and Lifestyle Survey<br>A body shape index                                              |                  |                                                                                                              |

Supplementary Materials

|                                                                                                                       |                  |                                                                                                                                                     |
|-----------------------------------------------------------------------------------------------------------------------|------------------|-----------------------------------------------------------------------------------------------------------------------------------------------------|
| <0.0762                                                                                                               | 0.77 (0.66-0.88) | Age, BMI, WC, WHR, and WHtR                                                                                                                         |
| 0.076-0.079                                                                                                           | 0.78 (0.68-0.89) |                                                                                                                                                     |
| 0.079-0.082                                                                                                           | 1.00             |                                                                                                                                                     |
| 0.082-0.085                                                                                                           | 0.97 (0.85-1.11) |                                                                                                                                                     |
| >0.085                                                                                                                | 1.23 (1.09-1.40) |                                                                                                                                                     |
| 1-SD increase                                                                                                         | 1.13 (1.09-1.16) |                                                                                                                                                     |
| Krakauer, the British Health and Lifestyle Survey                                                                     |                  |                                                                                                                                                     |
| Waist circumference (cm), 1-SD increase                                                                               | 1.09 (1.03-1.14) | Age, BMI, ABSI, and WHtR                                                                                                                            |
| Waist-to-height ratio, 1-SD increase                                                                                  | 1.11 (1.06-1.16) |                                                                                                                                                     |
| Lahmann, The Malmo Diet and Cancer Study<br>Waist-to-hip ratio, Men                                                   |                  |                                                                                                                                                     |
| <0.895                                                                                                                | 1.00             | Age, height, smoking, and leisure physical activity                                                                                                 |
| 0.895-0.927                                                                                                           | 1.13 (0.86-1.48) |                                                                                                                                                     |
| 0.927-0.955                                                                                                           | 1.20 (0.92-1.57) |                                                                                                                                                     |
| 0.955-0.990                                                                                                           | 1.08 (0.82-1.42) |                                                                                                                                                     |
| >0.990                                                                                                                | 1.58 (1.22-2.05) |                                                                                                                                                     |
| Lahmann, The Malmo Diet and Cancer Study<br>Waist-to-hip ratio, Women                                                 |                  |                                                                                                                                                     |
| <0.750                                                                                                                | 1.00             | Age, height, smoking, and leisure physical activity                                                                                                 |
| 0.750-0.777                                                                                                           | 1.24 (0.87-1.79) |                                                                                                                                                     |
| 0.777-0.802                                                                                                           | 1.21 (0.84-1.74) |                                                                                                                                                     |
| 0.802-0.835                                                                                                           | 1.44 (1.02-2.03) |                                                                                                                                                     |
| >0.835                                                                                                                | 1.98 (1.44-2.74) |                                                                                                                                                     |
| Berentzen, Danish Diet, Cancer and Health study<br>Waist circumference (cm), 1993-97                                  |                  |                                                                                                                                                     |
| WC, Per 5 cm increase                                                                                                 | 1.11 (1.04-1.18) | Age, smoking habits, Mediterranean diet score, energy intake, education, drinking pattern, sports activity, menopausal status (women only), and BMI |
| WC, Per 5 cm increase, Men                                                                                            | 1.10 (0.98-1.23) |                                                                                                                                                     |
| WC, Per 5 cm increase, women                                                                                          | 1.06 (0.97-1.18) |                                                                                                                                                     |
| Berentzen, Danish Diet, Cancer and Health study<br>Waist circumference (cm), 1999-02                                  |                  |                                                                                                                                                     |
| WC, Per 5 cm increase                                                                                                 | 1.11 (1.05-1.17) | Age, smoking habits, Mediterranean diet score, energy intake, education, drinking pattern, sports activity, menopausal status (women only), and BMI |
| WC, Per 5 cm increase, Men                                                                                            | 1.12 (1.04-1.21) |                                                                                                                                                     |
| WC, Per 5 cm increase, women                                                                                          | 1.07 (1.02-1.12) |                                                                                                                                                     |
| Lanfer, the DANISH MONICA study and the Prospective Population Study of Women in Gothenburg<br>Hip circumference (cm) |                  |                                                                                                                                                     |



Supplementary Materials

|                                                                                  |                  |                                                                                                                                                                                                                      |
|----------------------------------------------------------------------------------|------------------|----------------------------------------------------------------------------------------------------------------------------------------------------------------------------------------------------------------------|
| <92.0                                                                            | 1.00             | BMI, waist, age, education, leisure time physical activity, smoking status, menopausal status and cohort                                                                                                             |
| 92.5-95.5                                                                        | 0.73 (0.57-0.92) |                                                                                                                                                                                                                      |
| 96.0-99.5                                                                        | 0.55 (0.43-0.71) |                                                                                                                                                                                                                      |
| 100.0-104.5                                                                      | 0.58 (0.44-0.76) |                                                                                                                                                                                                                      |
| >105.0                                                                           | 0.54 (0.37-0.78) |                                                                                                                                                                                                                      |
| Per 5 cm                                                                         | 0.83 (0.75-0.91) |                                                                                                                                                                                                                      |
| Laukkanen, Kuopio Ischemic Heart Disease Risk Factor Study<br>Waist-to-hip ratio |                  |                                                                                                                                                                                                                      |
| WHR, 1-SD increase (0.06 unit)                                                   | 1.00 (0.87-1.13) | Age, alcohol consumption, C-reactive protein, HDL, family history of coronary disease, drug use, physical activity, and European Systematic Coronary Risk Evaluation score                                           |
| Lee, Cooper Clinic Study<br>Waist circumference (cm)                             |                  |                                                                                                                                                                                                                      |
| <87                                                                              | 1.00             | Age, examination year, smoking, alcohol intake, and parental history of ischemic heart disease                                                                                                                       |
| 87-99, Fit                                                                       | 1.05 (0.66-1.67) |                                                                                                                                                                                                                      |
| 87-99, Unfit                                                                     | 2.05 (1.08-3.87) |                                                                                                                                                                                                                      |
| >99, Fit                                                                         | 0.95 (0.54-1.66) |                                                                                                                                                                                                                      |
| >99, Unfit                                                                       | 2.40 (1.41-4.07) |                                                                                                                                                                                                                      |
| Lindqvist, Gothenburg Women study<br>Waist-to-hip ratio                          |                  |                                                                                                                                                                                                                      |
| WHR, 0.1 unit, younger women                                                     | 1.60 (0.99-2.58) | Age, BMI, smoking, physical activity, and triglyceride concentration                                                                                                                                                 |
| WHR, 0.1 unit, older women                                                       | 1.80 (1.30-2.49) |                                                                                                                                                                                                                      |
| Lissner, Swedish Female Cohort<br>Hip circumference (cm)                         |                  |                                                                                                                                                                                                                      |
| <94.5                                                                            | 1.00             | Age, smoking, waist circumference, and BMI                                                                                                                                                                           |
| 94.5-98.5                                                                        | 0.69 (0.48-1.00) |                                                                                                                                                                                                                      |
| 98.5-103.5                                                                       | 0.55 (0.37-0.82) |                                                                                                                                                                                                                      |
| >103.5                                                                           | 0.59 (0.35-0.99) |                                                                                                                                                                                                                      |
| Martinez-Gomez, Cohort of older adults<br>Waist circumference (cm)               |                  |                                                                                                                                                                                                                      |
| WC, 1 cm, Men                                                                    | 1.01 (1.00-1.02) | Age, educational attainment, alcohol intake, former drinking, physical activity, smoking status, systolic blood pressure, hypercholesterolemia, CHD, stroke, diabetes mellitus, hip fracture, and cancer at any site |
| WC, 1 cm, Women                                                                  | 1.02 (1.01-1.03) |                                                                                                                                                                                                                      |
| Mason, Canada Fitness Survey                                                     |                  |                                                                                                                                                                                                                      |

Supplementary Materials

|                                                                                  |                  |                                                                                                                                                                             |
|----------------------------------------------------------------------------------|------------------|-----------------------------------------------------------------------------------------------------------------------------------------------------------------------------|
| Waist circumference (cm)                                                         |                  |                                                                                                                                                                             |
| WC, Men, 1-SD increase                                                           | 0.99 (0.88-1.11) | Age, smoking status, alcohol consumption, and leisure-time physical activity                                                                                                |
| WC, Women, 1-SD increase                                                         | 1.17 (1.04-1.33) |                                                                                                                                                                             |
| Mason, Canada Fitness Survey<br>Hip circumference (cm)                           |                  |                                                                                                                                                                             |
| HC, Men, 1-SD increase                                                           | 0.98 (0.87-1.09) | Age, smoking status, alcohol consumption, and leisure-time physical activity                                                                                                |
| HC, Women, 1-SD increase                                                         | 1.07 (0.95-1.21) |                                                                                                                                                                             |
| Mason, Canada Fitness Survey<br>Thigh circumference (cm)                         |                  |                                                                                                                                                                             |
| TC, Men, 1-SD increase                                                           | 0.84 (0.75-0.95) | Age, smoking status, alcohol consumption, and leisure-time physical activity                                                                                                |
| TC, Women, 1-SD increase                                                         | 0.95 (0.83-1.08) |                                                                                                                                                                             |
| Mason, Canada Fitness Survey<br>Waist-to-hip ratio                               |                  |                                                                                                                                                                             |
| WHR, Men, 1-SD increase                                                          | 1.04 (0.90-1.19) | Age, smoking status, alcohol consumption, and leisure-time physical activity                                                                                                |
| WHR, Women, 1-SD increase                                                        | 1.18 (1.04-1.34) |                                                                                                                                                                             |
| Mason, Canada Fitness Survey<br>Waist-to-thigh ratio                             |                  |                                                                                                                                                                             |
| WTR, Men, 1-SD increase                                                          | 1.14 (1.02-1.28) | Age, smoking status, alcohol consumption, and leisure-time physical activity                                                                                                |
| WTR, Women, 1-SD increase                                                        | 1.21 (1.08-1.36) |                                                                                                                                                                             |
| MCNeely, the Japanese Community Diabetes Study<br>Waist circumference (cm)       |                  |                                                                                                                                                                             |
| WC, interquartile range (25 <sup>th</sup> to 75 <sup>th</sup> percentile)        | 1.22 (0.95-1.62) | Sex and smoking status                                                                                                                                                      |
| Moliner-Urdiales, Aerobics Centre Longitudinal Study<br>Body adiposity index (%) |                  |                                                                                                                                                                             |
| 21.5% (mean)                                                                     | 1.00             | Age, examination year, physical activity, smoking, alcohol intake, abnormal electrocardiogram, hypercholesterolemia, hypertension and diabetes, and parental history of CVD |
| 24.4                                                                             | 0.99 (0.76-1.28) |                                                                                                                                                                             |
| 28.5                                                                             | 1.12 (0.86-1.46) |                                                                                                                                                                             |
| 1-SD increase                                                                    | 1.09 (0.97-1.22) |                                                                                                                                                                             |
| Moliner-Urdiales, Aerobics Centre Longitudinal Study<br>Waist circumference (cm) |                  |                                                                                                                                                                             |
| 1-SD increase                                                                    | 1.10 (0.98-1.24) | Age, examination year, physical activity, smoking, alcohol                                                                                                                  |

Supplementary Materials

|                                                                |                  |                                                                                                                                                                                                      |
|----------------------------------------------------------------|------------------|------------------------------------------------------------------------------------------------------------------------------------------------------------------------------------------------------|
|                                                                |                  | intake, abnormal electrocardiogram, hypercholesterolemia, hypertension and diabetes, and parental history of CVD                                                                                     |
| Park, The Korean National Health Insurance Cohort (NHIS) study |                  |                                                                                                                                                                                                      |
| Waist circumference (cm)                                       |                  |                                                                                                                                                                                                      |
| <0.64.0                                                        | 1.00 (0.83-1.21) | Age, sex, systolic blood pressure, fasting glucose, hemoglobin, alanine aminotransferase, gamma-glutamyltransferase, smoking, alcohol consumption, physical activity level, and socioeconomic status |
| 64.0-68.8                                                      | 0.75 (0.65-0.86) |                                                                                                                                                                                                      |
| 68.8-73.9                                                      | 0.83 (0.75-0.92) |                                                                                                                                                                                                      |
| 73.9-78.6                                                      | 0.90 (0.83-0.98) |                                                                                                                                                                                                      |
| 78.6-84.8                                                      | 1.00             |                                                                                                                                                                                                      |
| 84.8-88.8                                                      | 1.06 (0.98-1.16) |                                                                                                                                                                                                      |
| 88.8-92.2                                                      | 1.11 (1.00-1.23) |                                                                                                                                                                                                      |
| 92.2-97.4                                                      | 1.21 (1.07-1.37) |                                                                                                                                                                                                      |
| 97.4-103.0                                                     | 1.38 (1.16-1.65) |                                                                                                                                                                                                      |
| >103.0                                                         | 1.33 (1.02-1.73) |                                                                                                                                                                                                      |
| Park, The Korean National Health Insurance Cohort (NHIS) study |                  |                                                                                                                                                                                                      |
| Waist-to-height ratio                                          |                  |                                                                                                                                                                                                      |
| <0.40                                                          | 0.88 (0.72-1.07) | Age, sex, systolic blood pressure, fasting glucose, hemoglobin, alanine aminotransferase, gamma-glutamyltransferase, smoking, alcohol consumption, physical activity level, and socioeconomic status |
| 0.40-0.43                                                      | 0.66 (0.57-0.76) |                                                                                                                                                                                                      |
| 0.43-0.45                                                      | 0.85 (0.75-0.95) |                                                                                                                                                                                                      |
| 0.45-0.48                                                      | 0.91 (0.83-0.99) |                                                                                                                                                                                                      |
| 0.48-0.51                                                      | 1.00             |                                                                                                                                                                                                      |
| 0.51-0.54                                                      | 1.10 (1.01-1.19) |                                                                                                                                                                                                      |
| 0.54-0.56                                                      | 1.19 (1.07-1.32) |                                                                                                                                                                                                      |
| 0.56-0.60                                                      | 1.30 (1.17-1.45) |                                                                                                                                                                                                      |
| 0.60-0.63                                                      | 1.64 (1.41-1.91) |                                                                                                                                                                                                      |
| >0.63                                                          | 2.13 (1.78-2.54) |                                                                                                                                                                                                      |
| Park, The Korean National Health Insurance Cohort (NHIS) study |                  |                                                                                                                                                                                                      |
| A body shape index                                             |                  |                                                                                                                                                                                                      |
| <0.0695                                                        | 1.33 (1.04-1.71) | Age, sex, systolic blood pressure, fasting glucose, hemoglobin, alanine aminotransferase, gamma-glutamyltransferase, smoking, alcohol consumption, physical activity level, and socioeconomic status |
| 0.0695-0.0723                                                  | 1.15 (0.96-1.38) |                                                                                                                                                                                                      |
| 0.0723-0.0749                                                  | 1.03 (0.91-1.18) |                                                                                                                                                                                                      |
| 0.0749-0.0772                                                  | 1.01 (0.91-1.13) |                                                                                                                                                                                                      |
| 0.0772-0.0804                                                  | 1.00             |                                                                                                                                                                                                      |
| 0.0804-0.0826                                                  | 1.14 (1.04-1.24) |                                                                                                                                                                                                      |
| 0.0826-0.0846                                                  | 1.18 (1.07-1.29) |                                                                                                                                                                                                      |

Supplementary Materials

|                                                                          |                  |                                     |
|--------------------------------------------------------------------------|------------------|-------------------------------------|
| 0.0846-0.0877                                                            | 1.34 (1.22-1.46) |                                     |
| 0.0877-0.0913                                                            | 1.47 (1.32-1.62) |                                     |
| >0.0913                                                                  | 1.82 (1.63-2.04) |                                     |
| Petursson, the Norwegian HUNT 2 Study<br>Waist circumference (cm), Men   |                  |                                     |
| <80                                                                      | 1.17 (0.96-1.42) | Age, smoking, and physical activity |
| 80-89                                                                    | 1.00             |                                     |
| 90-99                                                                    | 1.01 (0.92-1.11) |                                     |
| 100-109                                                                  | 1.11 (0.99-1.24) |                                     |
| >110                                                                     | 1.64 (1.41-1.90) |                                     |
| Per 10 cm increase                                                       | 1.11 (1.07-1.16) |                                     |
| Per SD increase                                                          | 1.10 (1.06-1.14) |                                     |
| Petursson, the Norwegian HUNT 2 Study<br>Waist circumference (cm), Women |                  |                                     |
| <70                                                                      | 1.11 (0.92-1.35) | Age, smoking, and physical activity |
| 70-79                                                                    | 1.00             |                                     |
| 80-89                                                                    | 1.00 (0.90-1.12) |                                     |
| 90-99                                                                    | 1.11 (0.99-1.23) |                                     |
| >100                                                                     | 1.48 (1.30-1.70) |                                     |
| Per 10 cm increase                                                       | 1.11 (1.07-1.16) |                                     |
| Per SD increase                                                          | 1.13 (1.09-1.18) |                                     |
| Petursson, the Norwegian HUNT 2 Study<br>Hip circumference (cm), Men     |                  |                                     |
| <95                                                                      | 1.18 (1.02-1.36) | Age, smoking, and physical activity |
| 95-99                                                                    | 1.00             |                                     |
| 100-104                                                                  | 0.89 (0.80-0.99) |                                     |
| 105-109                                                                  | 0.86 (0.76-0.96) |                                     |
| >110                                                                     | 1.17 (1.03-1.33) |                                     |
| Per 10 cm increase                                                       | 1.01 (0.95-1.07) |                                     |
| Per SD increase                                                          | 1.01 (0.97-1.05) |                                     |
| Petursson, the Norwegian HUNT 2 Study<br>Hip circumference (cm), Women   |                  |                                     |
| <95                                                                      | 1.10 (0.95-1.27) | Age, smoking, and physical activity |
| 95-99                                                                    | 1.00             |                                     |
| 100-104                                                                  | 0.86 (0.75-0.98) |                                     |

Supplementary Materials

|                                       |                  |                                     |
|---------------------------------------|------------------|-------------------------------------|
| 105-109                               | 0.87 (0.76-1.00) |                                     |
| >110                                  | 1.02 (0.90-1.15) |                                     |
| Per 10 cm increase                    | 1.03 (0.98-1.07) |                                     |
| Per SD increase                       | 1.03 (0.99-1.07) |                                     |
| Petursson, the Norwegian HUNT 2 Study |                  |                                     |
| Waist-to-hip ratio, Men               |                  |                                     |
| <0.85                                 | 1.07 (0.90-1.26) | Age, smoking, and physical activity |
| 0.85-0.87                             | 1.00             |                                     |
| 0.88-0.89                             | 1.12 (0.97-1.29) |                                     |
| 0.90-0.93                             | 1.14 (0.99-1.30) |                                     |
| >0.94                                 | 1.38 (1.21-1.56) |                                     |
| Per 0.1 unit                          | 1.28 (1.20-1.36) |                                     |
| Per SD                                | 1.15 (1.11-1.19) |                                     |
| Petursson, the Norwegian HUNT 2 Study |                  |                                     |
| Waist-to-hip ratio, Women             |                  |                                     |
| <0.74                                 | 1.01 (0.84-1.22) | Age, smoking, and physical activity |
| 0.74-0.77                             | 1.00             |                                     |
| 0.78-0.79                             | 1.08 (0.93-1.26) |                                     |
| 0.80-0.83                             | 1.16 (1.00-1.34) |                                     |
| >0.84                                 | 1.48 (1.29-1.69) |                                     |
| Per 0.1 unit                          | 1.34 (1.25-1.43) |                                     |
| Per SD                                | 1.19 (1.15-1.24) |                                     |
| Petursson, the Norwegian HUNT 2 Study |                  |                                     |
| Waist-to-height ratio, Men            |                  |                                     |
| <0.47                                 | 1.10 (0.93-1.30) | Age, smoking, and physical activity |
| 0.48-0.49                             | 1.00             |                                     |
| 0.50-0.51                             | 1.11 (0.96-1.27) |                                     |
| 0.52-0.54                             | 1.07 (0.94-1.23) |                                     |
| >0.55                                 | 1.24 (1.09-1.40) |                                     |
| Per 0.1 unit                          | 1.24 (1.15-1.33) |                                     |
| Per SD                                | 1.12 (1.08-1.16) |                                     |
| Petursson, the Norwegian HUNT 2 Study |                  |                                     |
| Waist-to-height ratio, Women          |                  |                                     |
| <0.43                                 | 1.29 (1.05-1.59) | Age, smoking, and physical activity |
| 0.43-0.46                             | 1.00             |                                     |

Supplementary Materials

|                                                                                                                      |                  |                                                                                                       |
|----------------------------------------------------------------------------------------------------------------------|------------------|-------------------------------------------------------------------------------------------------------|
| 0.47-0.49                                                                                                            | 1.19 (1.01-1.40) |                                                                                                       |
| 0.50-0.54                                                                                                            | 1.15 (0.99-1.34) |                                                                                                       |
| >0.55                                                                                                                | 1.35 (1.16-1.56) |                                                                                                       |
| Per 0.1 unit                                                                                                         | 1.20 (1.14-1.27) |                                                                                                       |
| Per SD                                                                                                               | 1.14 (1.10-1.19) |                                                                                                       |
| Pischoon, the European Prospective Investigation into Cancer and Nutrition (EPIC)<br>Waist circumference (cm), Men   |                  |                                                                                                       |
| <86.0                                                                                                                | 1.00             | Age at recruitment, smoking status, educational level, alcohol consumption, activity, height, and BMI |
| 86.0-91.5                                                                                                            | 1.15 (1.05-1.26) |                                                                                                       |
| 91.5-96.5                                                                                                            | 1.35 (1.22-1.50) |                                                                                                       |
| 96.5-102.7                                                                                                           | 1.63 (1.46-1.83) |                                                                                                       |
| >102.7                                                                                                               | 2.05 (1.80-2.33) |                                                                                                       |
| Pischoon, the European Prospective Investigation into Cancer and Nutrition (EPIC)<br>Waist circumference (cm), Women |                  |                                                                                                       |
| <70.1                                                                                                                | 1.00             | Age at recruitment, smoking status, educational level, alcohol consumption, activity, height, and BMI |
| 70.1-75.6                                                                                                            | 1.16 (1.05-1.28) |                                                                                                       |
| 75.6-81.0                                                                                                            | 1.21 (1.09-1.35) |                                                                                                       |
| 81.0-89.0                                                                                                            | 1.46 (1.30-1.64) |                                                                                                       |
| >89.0                                                                                                                | 1.78 (1.56-2.04) |                                                                                                       |
| Pischoon, the European Prospective Investigation into Cancer and Nutrition (EPIC)<br>Waist-to-hip ratio, Men         |                  |                                                                                                       |
| <0.89                                                                                                                | 1.00             | Age at recruitment, smoking status, educational level, alcohol consumption, activity, height, and BMI |
| 0.89-0.92                                                                                                            | 1.15 (1.05-1.26) |                                                                                                       |
| 0.92-0.95                                                                                                            | 1.26 (1.16-1.38) |                                                                                                       |
| 0.95-0.99                                                                                                            | 1.36 (1.24-1.49) |                                                                                                       |
| >0.99                                                                                                                | 1.68 (1.53-1.84) |                                                                                                       |
| Pischoon, the European Prospective Investigation into Cancer and Nutrition (EPIC)<br>Waist-to-hip ratio, Women       |                  |                                                                                                       |
| <0.73                                                                                                                | 1.00             | Age at recruitment, smoking status, educational level, alcohol consumption, activity, height, and BMI |
| 0.73-0.77                                                                                                            | 1.09 (0.99-1.20) |                                                                                                       |
| 0.77-0.80                                                                                                            | 1.12 (1.02-1.22) |                                                                                                       |
| 0.80-0.85                                                                                                            | 1.23 (1.12-1.34) |                                                                                                       |
| >0.85                                                                                                                | 1.51 (1.37-1.66) |                                                                                                       |
| Price, Health and social assessment of older persons<br>Waist circumference (cm), Men, nonsmokers                    |                  |                                                                                                       |

Supplementary Materials

|                                                                                                                  |                  |                                                                                                                                                                                                                                                            |
|------------------------------------------------------------------------------------------------------------------|------------------|------------------------------------------------------------------------------------------------------------------------------------------------------------------------------------------------------------------------------------------------------------|
| 64.0-88.4                                                                                                        | 1.00             | Age, height, serious illness in loved one in past y, depression, cognitive impairment, unexplained recent weight loss_3.2 kg, housing type, UK quintiles of Carstairs area deprivation score, former smoking (in nonsmokers only), and alcohol consumption |
| 88.4-94.2                                                                                                        | 1.03 (0.90-1.18) |                                                                                                                                                                                                                                                            |
| 94.2-99.5                                                                                                        | 0.98 (0.83-1.15) |                                                                                                                                                                                                                                                            |
| 99.5-105.6                                                                                                       | 0.89 (0.77-1.02) |                                                                                                                                                                                                                                                            |
| 105.6-133.7                                                                                                      | 1.10 (0.95-1.28) |                                                                                                                                                                                                                                                            |
| Price, Health and social assessment of older persons<br>Waist-to-hip ratio, Men, nonsmokers                      |                  |                                                                                                                                                                                                                                                            |
| 0.74-0.89                                                                                                        | 1.00             | Age, height, serious illness in loved one in past y, depression, cognitive impairment, unexplained recent weight loss_3.2 kg, housing type, UK quintiles of Carstairs area deprivation score, former smoking (in nonsmokers only), and alcohol consumption |
| 0.89-0.92                                                                                                        | 1.14 (0.97-1.34) |                                                                                                                                                                                                                                                            |
| 0.92-0.95                                                                                                        | 1.06 (0.92-1.23) |                                                                                                                                                                                                                                                            |
| 0.95-0.99                                                                                                        | 1.14 (1.01-1.29) |                                                                                                                                                                                                                                                            |
| 0.99-1.18                                                                                                        | 1.21 (1.05-1.41) |                                                                                                                                                                                                                                                            |
| Price, Health and social assessment of older persons<br>Waist circumference (cm), Women, nonsmokers              |                  |                                                                                                                                                                                                                                                            |
| 59.1-77.0                                                                                                        | 1.00             | Age, height, serious illness in loved one in past y, depression, cognitive impairment, unexplained recent weight loss_3.2 kg, housing type, UK quintiles of Carstairs area deprivation score, former smoking (in nonsmokers only), and alcohol consumption |
| 77.0-83.1                                                                                                        | 0.91 (0.78-1.05) |                                                                                                                                                                                                                                                            |
| 83.1-88.4                                                                                                        | 0.92 (0.80-1.05) |                                                                                                                                                                                                                                                            |
| 88.4-95.6                                                                                                        | 0.86 (0.74-1.00) |                                                                                                                                                                                                                                                            |
| 95.6-126.1                                                                                                       | 0.98 (0.85-1.14) |                                                                                                                                                                                                                                                            |
| Price, Health and social assessment of older persons<br>Waist-to-hip ratio, Women, nonsmokers                    |                  |                                                                                                                                                                                                                                                            |
| 0.67-0.79                                                                                                        | 1.00             | Age, height, serious illness in loved one in past y, depression, cognitive impairment, unexplained recent weight loss_3.2 kg, housing type, UK quintiles of Carstairs area deprivation score, former smoking (in nonsmokers only), and alcohol consumption |
| 0.79-0.82                                                                                                        | 1.03 (0.92-1.15) |                                                                                                                                                                                                                                                            |
| 0.82-0.85                                                                                                        | 1.19 (1.05-1.34) |                                                                                                                                                                                                                                                            |
| 0.85-0.90                                                                                                        | 1.12 (1.00-1.26) |                                                                                                                                                                                                                                                            |
| 0.90-1.13                                                                                                        | 1.27 (1.11-1.46) |                                                                                                                                                                                                                                                            |
| Pujilestari, Collaboration Study on global AGEing and adult health (SAGE)<br>Waist circumference (cm), Men, poor |                  |                                                                                                                                                                                                                                                            |
| <64                                                                                                              | 2.06 (1.28-3.31) | Sex, age group, marital status, education, occupation, residence, self-reported chronic disease and wealth status.                                                                                                                                         |
| 64-70                                                                                                            | 1.51 (0.94-2.41) |                                                                                                                                                                                                                                                            |
| 70-75                                                                                                            | 1.00             |                                                                                                                                                                                                                                                            |
| 75-80                                                                                                            | 1.27 (0.83-1.94) |                                                                                                                                                                                                                                                            |
| 80-88                                                                                                            | 1.06 (0.91-1.22) |                                                                                                                                                                                                                                                            |
| Pujilestari, Collaboration Study on global AGEing and adult health (SAGE)<br>Waist circumference (cm), Men, rich |                  |                                                                                                                                                                                                                                                            |

Supplementary Materials

|                                                                                                                    |                  |                                                                                                                                                      |
|--------------------------------------------------------------------------------------------------------------------|------------------|------------------------------------------------------------------------------------------------------------------------------------------------------|
| <54                                                                                                                | 1.01 (0.67-1.54) | Sex, age group, marital status, education, occupation, residence, self-reported chronic disease and wealth status.                                   |
| 54-72                                                                                                              | 1.00 (0.69-1.47) |                                                                                                                                                      |
| 72-77                                                                                                              | 1.00             |                                                                                                                                                      |
| 77-83                                                                                                              | 0.92 (0.74-1.16) |                                                                                                                                                      |
| 83-93                                                                                                              | 1.01 (0.92-1.12) |                                                                                                                                                      |
| Pujilestari, Collaboration Study on global AGEing and adult health (SAGE)<br>Waist circumference (cm), women, poor |                  |                                                                                                                                                      |
| <62                                                                                                                | 1.36 (0.97-1.90) | Sex, age group, marital status, education, occupation, residence, self-reported chronic disease and wealth status.                                   |
| 6962-69                                                                                                            | 1.39 (1.06-1.82) |                                                                                                                                                      |
| 69-75                                                                                                              | 1.00             |                                                                                                                                                      |
| 75-81                                                                                                              | 0.98 (0.93-1.03) |                                                                                                                                                      |
| 81-92                                                                                                              | 0.89 (0.64-1.25) |                                                                                                                                                      |
| Pujilestari, Collaboration Study on global AGEing and adult health (SAGE)<br>Waist circumference (cm), Women, rich |                  |                                                                                                                                                      |
| <63                                                                                                                | 1.32 (0.86-2.03) | Sex, age group, marital status, education, occupation, residence, self-reported chronic disease and wealth status.                                   |
| 63-72                                                                                                              | 1.22 (0.89-1.66) |                                                                                                                                                      |
| 72-78                                                                                                              | 1.00             |                                                                                                                                                      |
| 78-85                                                                                                              | 0.98 (0.77-1.24) |                                                                                                                                                      |
| 85-97                                                                                                              | 1.24 (0.78-1.98) |                                                                                                                                                      |
| Reis, the third National Health and Nutrition Examination Survey<br>Waist circumference (cm), Men, 30-64 years     |                  |                                                                                                                                                      |
| <87.2                                                                                                              | 1.00             | Age, race/ethnicity, education, smoking status, alcohol use, heart disease, stroke, respiratory disease, and cancer (except nonmelanoma skin cancer) |
| 87.2-94.0                                                                                                          | 0.93 (0.56-1.54) |                                                                                                                                                      |
| 94.0-99.8                                                                                                          | 0.52 (0.32-0.87) |                                                                                                                                                      |
| 100.0-107.2                                                                                                        | 1.00 (0.57-1.77) |                                                                                                                                                      |
| >107.2                                                                                                             | 1.22 (0.72-2.09) |                                                                                                                                                      |
| Reis, the third National Health and Nutrition Examination Survey<br>Waist circumference (cm), Men, 65-102 years    |                  |                                                                                                                                                      |
| <87.2                                                                                                              | 1.00             | Age, race/ethnicity, education, smoking status, alcohol use, heart disease, stroke, respiratory disease, and cancer (except nonmelanoma skin cancer) |
| 87.2-94.0                                                                                                          | 0.79 (0.52-1.21) |                                                                                                                                                      |
| 94.0-99.8                                                                                                          | 0.70 (0.50-0.99) |                                                                                                                                                      |
| 100.0-107.2                                                                                                        | 0.63 (0.47-0.86) |                                                                                                                                                      |
| >107.2                                                                                                             | 0.61 (0.43-0.87) |                                                                                                                                                      |
| Reis, the third National Health and Nutrition Examination Survey<br>Waist circumference (cm), Women, 30-64 years   |                  |                                                                                                                                                      |



Supplementary Materials

|                                                                                                                   |                  |                                                                                                                                                      |
|-------------------------------------------------------------------------------------------------------------------|------------------|------------------------------------------------------------------------------------------------------------------------------------------------------|
| <80.5                                                                                                             | 1.00             | Age, race/ethnicity, education, smoking status, alcohol use, heart disease, stroke, respiratory disease, and cancer (except nonmelanoma skin cancer) |
| 80.5-88.7                                                                                                         | 0.98 (0.49-1.95) |                                                                                                                                                      |
| 88.7-96.2                                                                                                         | 1.48 (0.68-3.21) |                                                                                                                                                      |
| 96.2-105.2                                                                                                        | 1.28 (0.63-2.60) |                                                                                                                                                      |
| >105.2                                                                                                            | 1.53 (0.78-3.01) |                                                                                                                                                      |
| Reis, the third National Health and Nutrition Examination Survey<br>Waist circumference (cm), Women, 65-102 years |                  |                                                                                                                                                      |
| <80.5                                                                                                             | 1.00             | Age, race/ethnicity, education, smoking status, alcohol use, heart disease, stroke, respiratory disease, and cancer (except nonmelanoma skin cancer) |
| 80.5-88.7                                                                                                         | 0.65 (0.48-0.89) |                                                                                                                                                      |
| 88.7-96.2                                                                                                         | 0.77 (0.57-1.06) |                                                                                                                                                      |
| 96.2-105.2                                                                                                        | 0.81 (0.61-1.09) |                                                                                                                                                      |
| >105.2                                                                                                            | 0.63 (0.43-0.93) |                                                                                                                                                      |
| Reis, the third National Health and Nutrition Examination Survey<br>Waist-to-hip ratio, Men, 30-64 years          |                  |                                                                                                                                                      |
| <0.921                                                                                                            | 1.00             | Age, race/ethnicity, education, smoking status, alcohol use, heart disease, stroke, respiratory disease, and cancer (except nonmelanoma skin cancer) |
| 0.921-0.963                                                                                                       | 1.61 (0.88-2.96) |                                                                                                                                                      |
| 0.963-0.997                                                                                                       | 1.08 (0.56-2.08) |                                                                                                                                                      |
| 0.997-1.035                                                                                                       | 1.26 (0.67-2.39) |                                                                                                                                                      |
| >1.035                                                                                                            | 1.98 (1.03-3.79) |                                                                                                                                                      |
| Reis, the third National Health and Nutrition Examination Survey<br>Waist-to-hip ratio, Men, 65-102 years         |                  |                                                                                                                                                      |
| <0.921                                                                                                            | 1.00             | Age, race/ethnicity, education, smoking status, alcohol use, heart disease, stroke, respiratory disease, and cancer (except nonmelanoma skin cancer) |
| 0.921-0.963                                                                                                       | 0.69 (0.46-1.02) |                                                                                                                                                      |
| 0.963-0.997                                                                                                       | 0.64 (0.43-0.95) |                                                                                                                                                      |
| 0.997-1.035                                                                                                       | 0.57 (0.38-0.83) |                                                                                                                                                      |
| >1.035                                                                                                            | 0.59 (0.40-0.85) |                                                                                                                                                      |
| Reis, the third National Health and Nutrition Examination Survey<br>Waist-to-hip ratio, Women, 30-64 years        |                  |                                                                                                                                                      |
| <0.827                                                                                                            | 1.00             | Age, race/ethnicity, education, smoking status, alcohol use, heart disease, stroke, respiratory disease, and cancer (except nonmelanoma skin cancer) |
| 0.827-0.874                                                                                                       | 1.20 (0.57-2.52) |                                                                                                                                                      |
| 0.874-0.917                                                                                                       | 1.89 (0.90-4.01) |                                                                                                                                                      |
| 0.917-0.965                                                                                                       | 2.05 (1.01-4.16) |                                                                                                                                                      |
| >.965                                                                                                             | 2.41 (1.21-4.77) |                                                                                                                                                      |
| Reis, the third National Health and Nutrition Examination Survey<br>Waist-to-hip ratio, Women, 65-102 years       |                  |                                                                                                                                                      |

Supplementary Materials

|                                                                                                                                                       |                  |                                                                                                                                                      |
|-------------------------------------------------------------------------------------------------------------------------------------------------------|------------------|------------------------------------------------------------------------------------------------------------------------------------------------------|
| <0.827                                                                                                                                                | 1.00             | Age, race/ethnicity, education, smoking status, alcohol use, heart disease, stroke, respiratory disease, and cancer (except nonmelanoma skin cancer) |
| 0.827-0.874                                                                                                                                           | 0.80 (0.49-1.31) |                                                                                                                                                      |
| 0.874-0.917                                                                                                                                           | 0.86 (0.48-1.51) |                                                                                                                                                      |
| 0.917-0.965                                                                                                                                           | 0.95 (0.58-1.53) |                                                                                                                                                      |
| >0.965                                                                                                                                                | 0.98 (0.61-1.60) |                                                                                                                                                      |
| Reis, the third National Health and Nutrition Examination Survey<br>Waist-to-thigh ratio, Men, 30-64 years                                            |                  |                                                                                                                                                      |
| <1.754                                                                                                                                                | 1.00             | Age, race/ethnicity, education, smoking status, alcohol use, heart disease, stroke, respiratory disease, and cancer (except nonmelanoma skin cancer) |
| 1.754-1.874                                                                                                                                           | 1.14 (0.59-2.19) |                                                                                                                                                      |
| 1.874-1.977                                                                                                                                           | 1.72 (0.90-3.27) |                                                                                                                                                      |
| 1.977-2.099                                                                                                                                           | 2.43 (1.27-4.63) |                                                                                                                                                      |
| >2.099                                                                                                                                                | 2.07 (1.00-4.29) |                                                                                                                                                      |
| Reis, the third National Health and Nutrition Examination Survey<br>Waist-to-thigh ratio, Men, 65-102 years                                           |                  |                                                                                                                                                      |
| <1.754                                                                                                                                                | 1.00             | Age, race/ethnicity, education, smoking status, alcohol use, heart disease, stroke, respiratory disease, and cancer (except nonmelanoma skin cancer) |
| 1.754-1.874                                                                                                                                           | 0.58 (0.36-0.93) |                                                                                                                                                      |
| 1.874-1.977                                                                                                                                           | 0.54 (0.37-0.79) |                                                                                                                                                      |
| 1.977-2.099                                                                                                                                           | 0.47 (0.33-0.68) |                                                                                                                                                      |
| >2.099                                                                                                                                                | 0.58 (0.42-0.81) |                                                                                                                                                      |
| Reis, the third National Health and Nutrition Examination Survey<br>Waist-to-thigh ratio, Women, 30-64 years                                          |                  |                                                                                                                                                      |
| <1.620                                                                                                                                                | 1.00             | Age, race/ethnicity, education, smoking status, alcohol use, heart disease, stroke, respiratory disease, and cancer (except nonmelanoma skin cancer) |
| 1.620-1.754                                                                                                                                           | 1.34 (0.66-2.73) |                                                                                                                                                      |
| 1.754-1.866                                                                                                                                           | 1.33 (0.58-3.04) |                                                                                                                                                      |
| 1.866-2.017                                                                                                                                           | 1.59 (0.72-3.52) |                                                                                                                                                      |
| >2.017                                                                                                                                                | 2.55 (1.25-5.22) |                                                                                                                                                      |
| Reis, the third National Health and Nutrition Examination Survey<br>Waist-to-thigh ratio, Women, 65-102 years                                         |                  |                                                                                                                                                      |
| <1.620                                                                                                                                                | 1.00             | Age, race/ethnicity, education, smoking status, alcohol use, heart disease, stroke, respiratory disease, and cancer (except nonmelanoma skin cancer) |
| 1.620-1.754                                                                                                                                           | 0.85 (0.53-1.34) |                                                                                                                                                      |
| 1.754-1.866                                                                                                                                           | 0.59 (0.37-0.94) |                                                                                                                                                      |
| 1.866-2.017                                                                                                                                           | 0.78 (0.49-1.25) |                                                                                                                                                      |
| >2.017                                                                                                                                                | 1.07 (0.69-1.66) |                                                                                                                                                      |
| Rost, the German population based KORA (Cooperative Health Research in the Region of Augsburg) Augsburg cohort study<br>Waist circumference (cm), Men |                  |                                                                                                                                                      |

Supplementary Materials

|                                                                                                                                                         |                   |                                                                                                                      |
|---------------------------------------------------------------------------------------------------------------------------------------------------------|-------------------|----------------------------------------------------------------------------------------------------------------------|
| <89.0                                                                                                                                                   | 1.15 (0.97-1.37)  | Age, survey, education level, alcohol intake, smoking status, physical activity, and time/smoking status interaction |
| 89.0-95.5                                                                                                                                               | 1.00              |                                                                                                                      |
| 95.5-102.0                                                                                                                                              | 0.99 (0.85-1.15)  |                                                                                                                      |
| >102.0                                                                                                                                                  | 1.28 (1.12-1.47)  |                                                                                                                      |
| Rost, the German population based KORA (Cooperative Health Research in the Region of Augsburg) Augsburg cohort study<br>Waist circumference (cm), Women |                   |                                                                                                                      |
| <74.0                                                                                                                                                   | 0.98 (0.745-1.31) | Age, survey, education level, alcohol intake, smoking status, physical activity, and time/smoking status interaction |
| 74.0-82.0                                                                                                                                               | 1.00              |                                                                                                                      |
| 82.0-91.0                                                                                                                                               | 1.22 (1.01-1.49)  |                                                                                                                      |
| >91.0                                                                                                                                                   | 1.63 (1.35-1.97)  |                                                                                                                      |
| Rost, the German population based KORA (Cooperative Health Research in the Region of Augsburg) Augsburg cohort study<br>Waist-to-hip ratio, Men         |                   |                                                                                                                      |
| <0.88                                                                                                                                                   | 1.04 (0.85-1.26)  | Age, survey, education level, alcohol intake, smoking status, physical activity, and time/smoking status interaction |
| 0.88-0.93                                                                                                                                               | 1.00              |                                                                                                                      |
| 0.93-0.97                                                                                                                                               | 1.12 (0.97-1.30)  |                                                                                                                      |
| >0.97                                                                                                                                                   | 1.35 (1.17-1.55)  |                                                                                                                      |
| Rost, the German population based KORA (Cooperative Health Research in the Region of Augsburg) Augsburg cohort study<br>Waist-to-hip ratio, Women       |                   |                                                                                                                      |
| <0.76                                                                                                                                                   | 0.68 (0.50-0.93)  | Age, survey, education level, alcohol intake, smoking status, physical activity, and time/smoking status interaction |
| 0.76-0.80                                                                                                                                               | 1.00              |                                                                                                                      |
| 0.80-0.85                                                                                                                                               | 1.29 (1.05-1.58)  |                                                                                                                      |
| >0.85                                                                                                                                                   | 1.63 (1.35-1.97)  |                                                                                                                      |
| Rost, the German population based KORA (Cooperative Health Research in the Region of Augsburg) Augsburg cohort study<br>Waist-to-height ratio, Men      |                   |                                                                                                                      |
| <0.51                                                                                                                                                   | 1.34 (1.10-1.64)  | Age, survey, education level, alcohol intake, smoking status, physical activity, and time/smoking status interaction |
| 0.51-0.55                                                                                                                                               | 1.00              |                                                                                                                      |
| 0.55-0.59                                                                                                                                               | 1.16 (1.00-1.35)  |                                                                                                                      |
| >0.59                                                                                                                                                   | 1.46 (1.27-1.69)  |                                                                                                                      |
| Rost, the German population based KORA (Cooperative Health Research in the Region of Augsburg) Augsburg cohort study<br>Waist-to-height ratio, Women    |                   |                                                                                                                      |
| <0.45                                                                                                                                                   | 1.03 (0.76-1.40)  | Age, survey, education level, alcohol intake, smoking status, physical activity, and time/smoking status interaction |
| 0.45-0.51                                                                                                                                               | 1.00              |                                                                                                                      |
| 0.51-0.57                                                                                                                                               | 1.20 (0.98-1.47)  |                                                                                                                      |
| >0.57                                                                                                                                                   | 1.61 (1.32-1.95)  |                                                                                                                      |
| Rost, the German population based KORA (Cooperative Health Research in the Region of Augsburg) Augsburg cohort study                                    |                   |                                                                                                                      |

Supplementary Materials

|                                                                                                                      |                  |                                                                                                                                                                                  |
|----------------------------------------------------------------------------------------------------------------------|------------------|----------------------------------------------------------------------------------------------------------------------------------------------------------------------------------|
| Body adiposity index, Men                                                                                            |                  |                                                                                                                                                                                  |
| <24.76                                                                                                               | 1.12 (0.93-1.34) | Age, survey, education level, alcohol intake, smoking status, physical activity, and time/smoking status interaction                                                             |
| 24.76-26.92                                                                                                          | 1.00             |                                                                                                                                                                                  |
| 26.92-29.30                                                                                                          | 1.02 (0.87-1.19) |                                                                                                                                                                                  |
| >29.30                                                                                                               | 1.23 (1.06-1.42) |                                                                                                                                                                                  |
| Rost, the German population based KORA (Cooperative Health Research in the Region of Augsburg) Augsburg cohort study |                  |                                                                                                                                                                                  |
| Body adiposity index (%), Women                                                                                      |                  |                                                                                                                                                                                  |
| <28.22                                                                                                               | 1.03 (0.76-1.40) | Age, survey, education level, alcohol intake, smoking status, physical activity, and time/smoking status interaction                                                             |
| 28.22-31.77                                                                                                          | 1.00             |                                                                                                                                                                                  |
| 31.77-36.15                                                                                                          | 1.20 (0.98-1.47) |                                                                                                                                                                                  |
| >36.15                                                                                                               | 1.61 (1.32-1.95) |                                                                                                                                                                                  |
| Sardarinia, Tehran Lipid and Glucose Study                                                                           |                  |                                                                                                                                                                                  |
| Waist circumference (cm)                                                                                             |                  |                                                                                                                                                                                  |
| WC, Men, 1-SD increase                                                                                               | 0.86 (0.78-1.02) | Age, systolic blood pressure, anti-hypertensive medication use, total and high-density lipoprotein cholesterol, diabetes, smoking and CVD prevalent                              |
| WC, Women, 1-SD increase                                                                                             | 1.02 (0.87-1.19) |                                                                                                                                                                                  |
| Sardarinia, Tehran Lipid and Glucose Study                                                                           |                  |                                                                                                                                                                                  |
| Waist-to-hip ratio                                                                                                   |                  |                                                                                                                                                                                  |
| WHR, Men, 1-SD increase                                                                                              | 0.99 (0.97-1.00) | Age, systolic blood pressure, anti-hypertensive medication use, total and high-density lipoprotein cholesterol, diabetes, smoking and CVD prevalent                              |
| WHR, Women, 1-SD increase                                                                                            | 1.02 (1.00-1.04) |                                                                                                                                                                                  |
| Sardarinia, Tehran Lipid and Glucose Study                                                                           |                  |                                                                                                                                                                                  |
| Waist-to-height ratio                                                                                                |                  |                                                                                                                                                                                  |
| WHtR, Men, 1-SD increase                                                                                             | 0.90 (0.78-1.05) | Age, systolic blood pressure, anti-hypertensive medication use, total and high-density lipoprotein cholesterol, diabetes, smoking and CVD prevalent                              |
| WHtR, Women, 1-SD increase                                                                                           | 1.66 (0.91-1.24) |                                                                                                                                                                                  |
| Sardarinia, Tehran Lipid and Glucose Study                                                                           |                  |                                                                                                                                                                                  |
| A body shape index                                                                                                   |                  |                                                                                                                                                                                  |
| ABSI, Men, 1-SD increase                                                                                             | 0.94 (0.81-1.09) | Age, systolic blood pressure, anti-hypertensive medication use, total and high-density lipoprotein cholesterol, diabetes, smoking and CVD prevalent                              |
| ABSI, Women, 1-SD increase                                                                                           | 1.28 (1.10-1.47) |                                                                                                                                                                                  |
| Sato, Japanese Specific Health Checkup program                                                                       |                  |                                                                                                                                                                                  |
| A body shape index, Men                                                                                              |                  |                                                                                                                                                                                  |
| 0.0759 (mean)                                                                                                        | 1.00             | Age, systolic blood pressure, high-density lipoprotein cholesterol, glycated hemoglobin, estimated glomerular filtration rate, drug use, past history of cardiovascular disease, |
| 0.0793                                                                                                               | 1.02 (0.82-1.27) |                                                                                                                                                                                  |
| 0.0816                                                                                                               | 1.30 (1.06-1.60) |                                                                                                                                                                                  |

Supplementary Materials

|                                                                                  |                  |                                                                                                                                                                                                             |
|----------------------------------------------------------------------------------|------------------|-------------------------------------------------------------------------------------------------------------------------------------------------------------------------------------------------------------|
| 0.0851                                                                           | 1.48 (1.21-1.80) | and current smoking status                                                                                                                                                                                  |
| 1-SD increase                                                                    | 1.30 (1.18-1.43) |                                                                                                                                                                                                             |
| Sato, Japanese Specific Health Checkup program<br>A body shape index, Women      |                  |                                                                                                                                                                                                             |
| 0.0765 (mean)                                                                    | 1.00             | Age, systolic blood pressure, high-density lipoprotein cholesterol, glycated hemoglobin, estimated glomerular filtration rate, drug use, past history of cardiovascular disease, and current smoking status |
| 0.0818                                                                           | 1.13 (0.86-1.49) |                                                                                                                                                                                                             |
| 0.0855                                                                           | 1.31 (1.00-1.71) |                                                                                                                                                                                                             |
| 0.0904                                                                           | 1.27 (0.97-1.66) |                                                                                                                                                                                                             |
| 1-SD increase                                                                    | 1.07 (0.99-1.17) |                                                                                                                                                                                                             |
| Sato, Japanese Specific Health Checkup program<br>Waist circumference (cm)       |                  |                                                                                                                                                                                                             |
| WC, Men, 1-SD increase                                                           | 0.98 (0.90-1.06) | Age, systolic blood pressure, high-density lipoprotein cholesterol, glycated hemoglobin, estimated glomerular filtration rate, drug use, past history of cardiovascular disease, and current smoking status |
| WC, Women, 1-SD increase                                                         | 0.96 (0.88-1.05) |                                                                                                                                                                                                             |
| Sato, Japanese Specific Health Checkup program<br>Waist-to-height ratio          |                  |                                                                                                                                                                                                             |
| WHtR, Men, 1-SD increase                                                         | 0.98 (0.90-1.07) | Age, systolic blood pressure, high-density lipoprotein cholesterol, glycated hemoglobin, estimated glomerular filtration rate, drug use, past history of cardiovascular disease, and current smoking status |
| WHtR, Women, 1-SD increase                                                       | 0.98 (0.90-1.07) |                                                                                                                                                                                                             |
| Saito, Three Japanese Community-Based Studies<br>Waist circumference (cm), Men   |                  |                                                                                                                                                                                                             |
| 58.0-75.8                                                                        | 1.00             | Age, community, smoking status, and alcohol drinking                                                                                                                                                        |
| 76.0-81.0                                                                        | 0.78 (0.65-0.93) |                                                                                                                                                                                                             |
| 81.5-85.0                                                                        | 0.73 (0.60-0.88) |                                                                                                                                                                                                             |
| 85.5-89.5                                                                        | 0.84 (0.69-1.01) |                                                                                                                                                                                                             |
| 90.0-112.0                                                                       | 0.77 (0.64-0.93) |                                                                                                                                                                                                             |
| Saito, Three Japanese Community-Based Studies<br>Waist circumference (cm), Women |                  |                                                                                                                                                                                                             |
| 53.0-70.4                                                                        | 1.00             | Age, community, smoking status, and alcohol drinking                                                                                                                                                        |
| 71.0-76.0                                                                        | 0.79 (0.61-1.02) |                                                                                                                                                                                                             |
| 76.5-81.5                                                                        | 0.91 (0.70-1.18) |                                                                                                                                                                                                             |
| 82.0-87.5                                                                        | 0.76 (0.59-0.98) |                                                                                                                                                                                                             |
| 88.0-120.0                                                                       | 0.84 (0.66-1.07) |                                                                                                                                                                                                             |

Supplementary Materials

|                                                                                                    |                  |                                                                                                                                                                              |
|----------------------------------------------------------------------------------------------------|------------------|------------------------------------------------------------------------------------------------------------------------------------------------------------------------------|
| Schneider, Two German cohort studies, the DETECT study and SHIP<br>Waist circumference (cm), Men   |                  |                                                                                                                                                                              |
| 67.5 (mean)                                                                                        | 1.00             | Age, sex, cohort (if applicable), educational status, professional status, marital status, smoking status, physical activity, kidney failure, cancer, liver disease, and BMI |
| 90                                                                                                 | 0.95 (0.70-1.44) |                                                                                                                                                                              |
| 98.3                                                                                               | 1.21 (0.83-1.79) |                                                                                                                                                                              |
| 109.8                                                                                              | 1.14 (0.73-1.88) |                                                                                                                                                                              |
| Schneider, Two German cohort studies, the DETECT study and SHIP<br>Waist circumference (cm), Women |                  |                                                                                                                                                                              |
| 72.85 (mean)                                                                                       | 1.00             | Age, sex, cohort (if applicable), educational status, professional status, marital status, smoking status, physical activity, kidney failure, cancer, liver disease, and BMI |
| 82.20                                                                                              | 1.36 (0.77-2.19) |                                                                                                                                                                              |
| 88.95                                                                                              | 1.54 (0.86-2.64) |                                                                                                                                                                              |
| 98.65                                                                                              | 2.90 (1.64-5.28) |                                                                                                                                                                              |
| Schneider, Two German cohort studies, the DETECT study and SHIP<br>Waist-to-hip ratio, Men         |                  |                                                                                                                                                                              |
| 0.645 (mean)                                                                                       | 1.00             | Age, sex, cohort (if applicable), educational status, professional status, marital status, smoking status, physical activity, kidney failure, cancer, liver disease, and BMI |
| 0.875                                                                                              | 1.23 (0.86-1.75) |                                                                                                                                                                              |
| 0.920                                                                                              | 1.11 (0.81-1.65) |                                                                                                                                                                              |
| 0.960                                                                                              | 1.17 (0.83-1.73) |                                                                                                                                                                              |
| Schneider, Two German cohort studies, the DETECT study and SHIP<br>Waist-to-hip ratio, Women       |                  |                                                                                                                                                                              |
| 0.765 (mean)                                                                                       | 1.00             | Age, sex, cohort (if applicable), educational status, professional status, marital status, smoking status, physical activity, kidney failure, cancer, liver disease, and BMI |
| 0.84                                                                                               | 1.13 (0.64-1.88) |                                                                                                                                                                              |
| 0.880                                                                                              | 1.26 (0.73-2.00) |                                                                                                                                                                              |
| 0.920                                                                                              | 1.58 (0.92-2.52) |                                                                                                                                                                              |
| Schneider, Two German cohort studies, the DETECT study and SHIP<br>Waist-to-height ratio, Men      |                  |                                                                                                                                                                              |
| 0.400 (mean)                                                                                       | 1.00             | Age, sex, cohort (if applicable), educational status, professional status, marital status, smoking status, physical activity, kidney failure, cancer, liver disease, and BMI |
| 0.535                                                                                              | 1.16 (0.81-1.73) |                                                                                                                                                                              |
| 0.585                                                                                              | 1.46 (0.93-2.11) |                                                                                                                                                                              |
| 0.645                                                                                              | 1.58 (0.92-2.62) |                                                                                                                                                                              |
| Schneider, Two German cohort studies, the DETECT study and SHIP<br>Waist-to-height ratio, Women    |                  |                                                                                                                                                                              |
| 0.420 (mean)                                                                                       | 1.00             | Age, sex, cohort (if applicable), educational status, professional status, marital status, smoking status, physical activity, kidney failure, cancer, liver disease, and BMI |
| 0.475                                                                                              | 0.88 (0.42-1.60) |                                                                                                                                                                              |
| 0.510                                                                                              | 1.32 (0.75-2.30) |                                                                                                                                                                              |

Supplementary Materials

|                                                                                                      |                  |                                                                                                                                                                                                                                                |
|------------------------------------------------------------------------------------------------------|------------------|------------------------------------------------------------------------------------------------------------------------------------------------------------------------------------------------------------------------------------------------|
| 0.570                                                                                                | 2.58 (1.44-4.67) |                                                                                                                                                                                                                                                |
| Lee, Cohort study on osteoporosis and general health in Hong Kong<br>Waist circumference (cm), Men   |                  |                                                                                                                                                                                                                                                |
| 77.2 (mean)                                                                                          | 1.00             | Age, physical activity, smoking status, and history of cancer, diabetes, and heart disease                                                                                                                                                     |
| 86.3                                                                                                 | 0.85 (0.59-1.21) |                                                                                                                                                                                                                                                |
| 88.8                                                                                                 | 0.58 (0.38-0.88) |                                                                                                                                                                                                                                                |
| 90.5                                                                                                 | 0.83 (0.57-1.19) |                                                                                                                                                                                                                                                |
| 94.6                                                                                                 | 0.87 (0.60-1.25) |                                                                                                                                                                                                                                                |
| Lee, Cohort study on osteoporosis and general health in Hong Kong<br>Waist circumference (cm), Women |                  |                                                                                                                                                                                                                                                |
| 77.2 (mean)                                                                                          | 1.00             | Age, physical activity, smoking status, and history of cancer, diabetes, and heart disease                                                                                                                                                     |
| 86.3                                                                                                 | 0.55 (0.24-1.23) |                                                                                                                                                                                                                                                |
| 88.8                                                                                                 | 1.00 (0.51-1.97) |                                                                                                                                                                                                                                                |
| 90.5                                                                                                 | 1.44 (0.76-2.71) |                                                                                                                                                                                                                                                |
| 94.6                                                                                                 | 1.31 (0.70-2.44) |                                                                                                                                                                                                                                                |
| Lee, Cohort study on osteoporosis and general health in Hong Kong<br>Waist-to-hip ratio, Men         |                  |                                                                                                                                                                                                                                                |
| 0.87 (mean)                                                                                          | 1.00             | Age, physical activity, smoking status, and history of cancer, diabetes, and heart disease                                                                                                                                                     |
| 0.91                                                                                                 | 0.68 (0.46-1.00) |                                                                                                                                                                                                                                                |
| 0.93                                                                                                 | 0.78 (0.53-1.14) |                                                                                                                                                                                                                                                |
| 0.94                                                                                                 | 0.92 (0.64-1.33) |                                                                                                                                                                                                                                                |
| 0.97                                                                                                 | 0.86 (0.60-1.23) |                                                                                                                                                                                                                                                |
| Lee, Cohort study on osteoporosis and general health in Hong Kong<br>Waist-to-hip ratio, Women       |                  |                                                                                                                                                                                                                                                |
| <0.85                                                                                                | 1.00             | Age, physical activity, smoking status, and history of cancer, diabetes, and heart disease                                                                                                                                                     |
| 0.85-0.89                                                                                            | 0.76 (0.37-1.55) |                                                                                                                                                                                                                                                |
| 0.90-0.94                                                                                            | 0.74 (0.36-1.52) |                                                                                                                                                                                                                                                |
| 0.95-0.99                                                                                            | 1.12 (0.60-2.10) |                                                                                                                                                                                                                                                |
| >1.00                                                                                                | 1.18 (0.63-2.21) |                                                                                                                                                                                                                                                |
| Simpson, Melbourne Collaborative Cohort Study<br>Waist circumference (cm), Men                       |                  |                                                                                                                                                                                                                                                |
| <85.5                                                                                                | 1.10 (0.90-1.30) | Age at attendance, country of birth, physical activity, alcohol intake, education, smoking status, living alone, and family history of heart attack; and stratified by “previous history of heart attack, angina, diabetes, stroke, and cancer |
| 85.5-90.8                                                                                            | 1.00             |                                                                                                                                                                                                                                                |
| 90.8-95.4                                                                                            | 1.00 (0.90-1.20) |                                                                                                                                                                                                                                                |
| 95.4-101.0                                                                                           | 1.10 (0.90-1.20) |                                                                                                                                                                                                                                                |

Supplementary Materials

|                                                                                                 |                   |                                                                                                                                                                                                                                                     |
|-------------------------------------------------------------------------------------------------|-------------------|-----------------------------------------------------------------------------------------------------------------------------------------------------------------------------------------------------------------------------------------------------|
| >101.0                                                                                          | 1.30 (1.10-1.50)  |                                                                                                                                                                                                                                                     |
| Simpson, Melbourne Collaborative Cohort Study<br>Waist circumference (cm), Men, Never smokers   |                   |                                                                                                                                                                                                                                                     |
| <79                                                                                             | 0.80 (0.50-1.130) | Age at attendance, country of birth, physical activity, alcohol intake, education, living alone (men only) and family history of heart attack (men only); and stratified by “previous history of heart attack, angina, diabetes, stroke, and cancer |
| 79-93                                                                                           | 1.00              |                                                                                                                                                                                                                                                     |
| 94-102                                                                                          | 1.00 (0.80-1.20)  |                                                                                                                                                                                                                                                     |
| >102                                                                                            | 1.30 (1.10-1.60)  |                                                                                                                                                                                                                                                     |
| Simpson, Melbourne Collaborative Cohort Study<br>Waist circumference (cm), Women                |                   |                                                                                                                                                                                                                                                     |
| <70.0                                                                                           | 1.40 (1.10-1.70)  | Age at attendance, country of birth, physical activity, alcohol intake, education, smoking status, living alone, and family history of heart attack; and stratified by “previous history of heart attack, angina, diabetes, stroke, and cancer      |
| 70.0-75.5                                                                                       | 1.00              |                                                                                                                                                                                                                                                     |
| 75.5-81.5                                                                                       | 1.10 (0.90-1.40)  |                                                                                                                                                                                                                                                     |
| 81.5-89.3                                                                                       | 1.10 (0.90-1.30)  |                                                                                                                                                                                                                                                     |
| >89.3                                                                                           | 1.30 (1.10-1.60)  |                                                                                                                                                                                                                                                     |
| Simpson, Melbourne Collaborative Cohort Study<br>Waist circumference (cm), Women, Never smokers |                   |                                                                                                                                                                                                                                                     |
| <68                                                                                             | 1.20 (0.90-1.60)  | Age at attendance, country of birth, physical activity, alcohol intake, education, living alone (men only) and family history of heart attack (men only); and stratified by “previous history of heart attack, angina, diabetes, stroke, and cancer |
| 68-80                                                                                           | 1.00              |                                                                                                                                                                                                                                                     |
| 80-880                                                                                          | 1.00 (0.80-1.20)  |                                                                                                                                                                                                                                                     |
| >88                                                                                             | 1.40 (1.10-1.60)  |                                                                                                                                                                                                                                                     |
| Simpson, Melbourne Collaborative Cohort Study<br>Waist-to-hip ratio, Men                        |                   |                                                                                                                                                                                                                                                     |
| <0.88                                                                                           | 1.10 (0.90-1.30)  | Age at attendance, country of birth, physical activity, alcohol intake, education, smoking status, living alone, and family history of heart attack; and stratified by “previous history of heart attack, angina, diabetes, stroke, and cancer      |
| 0.88-0.91                                                                                       | 1.00              |                                                                                                                                                                                                                                                     |
| 0.91-0.94                                                                                       | 1.10 (0.90-1.30)  |                                                                                                                                                                                                                                                     |
| 0.94-0.97                                                                                       | 1.20 (1.00-1.40)  |                                                                                                                                                                                                                                                     |
| >0.97                                                                                           | 1.30 (1.10-1.50)  |                                                                                                                                                                                                                                                     |
| Simpson, Melbourne Collaborative Cohort Study<br>Waist-to-hip ratio, Men, Never smokers         |                   |                                                                                                                                                                                                                                                     |
| <0.88                                                                                           | 1.20 (0.90-1.60)  | Age at attendance, country of birth, physical activity, alcohol intake, education, living alone (men only) and family history of heart attack (men only); and stratified by “previous history of heart attack, angina, diabetes, stroke, and cancer |
| 0.88-0.90                                                                                       | 1.00              |                                                                                                                                                                                                                                                     |
| 0.91-0.93                                                                                       | 1.40 (1.00-1.90)  |                                                                                                                                                                                                                                                     |
| 0.94-0.96                                                                                       | 1.30 (1.00-1.80)  |                                                                                                                                                                                                                                                     |
| >0.97                                                                                           | 1.50 (1.10-2.10)  |                                                                                                                                                                                                                                                     |
| Simpson, Melbourne Collaborative Cohort Study                                                   |                   |                                                                                                                                                                                                                                                     |



Supplementary Materials

|                                                                                                        |                  |                                                                                                                                                                                                                                                     |
|--------------------------------------------------------------------------------------------------------|------------------|-----------------------------------------------------------------------------------------------------------------------------------------------------------------------------------------------------------------------------------------------------|
| Waist-to-hip ratio, Women                                                                              |                  |                                                                                                                                                                                                                                                     |
| >0.73                                                                                                  | 1.30 (1.10-1.60) | Age at attendance, country of birth, physical activity, alcohol intake, education, smoking status, living alone, and family history of heart attack; and stratified by “previous history of heart attack, angina, diabetes, stroke, and cancer      |
| 0.73-0.76                                                                                              | 1.00             |                                                                                                                                                                                                                                                     |
| 0.76-0.80                                                                                              | 1.30 (1.00-1.50) |                                                                                                                                                                                                                                                     |
| 0.80-0.84                                                                                              | 1.20 (1.00-1.40) |                                                                                                                                                                                                                                                     |
| >0.84                                                                                                  | 1.50 (1.20-1.80) |                                                                                                                                                                                                                                                     |
| Simpson, Melbourne Collaborative Cohort Study<br>Waist-to-hip ratio, Women, Never smokers              |                  |                                                                                                                                                                                                                                                     |
| <0.73                                                                                                  | 1.40 (1.00-1.80) | Age at attendance, country of birth, physical activity, alcohol intake, education, living alone (men only) and family history of heart attack (men only); and stratified by “previous history of heart attack, angina, diabetes, stroke, and cancer |
| 0.73-0.75                                                                                              | 1.00             |                                                                                                                                                                                                                                                     |
| 0.76-0.79                                                                                              | 1.50 (1.10-1.90) |                                                                                                                                                                                                                                                     |
| 0.80-0.83                                                                                              | 1.30 (1.00-1.70) |                                                                                                                                                                                                                                                     |
| >0.84                                                                                                  | 1.70 (1.40-2.20) |                                                                                                                                                                                                                                                     |
| Srikanthan, the MacArthur Successful Aging Study<br>Waist circumference (cm)                           |                  |                                                                                                                                                                                                                                                     |
| WC, continuous (cm)                                                                                    | 1.00 (0.99-1.01) | Age, gender, race, current smoking status, and total pack-years of smoking                                                                                                                                                                          |
| Srikanthan, the MacArthur Successful Aging Study<br>Waist-to-hip ratio                                 |                  |                                                                                                                                                                                                                                                     |
| WHR, Per 0.1 unit increase                                                                             | 1.11 (0.97-1.28) | Age, gender, race, current smoking status, and total pack-years of smoking                                                                                                                                                                          |
| WHR, Men, Per 0.1 unit increase                                                                        | 0.95 (0.77-1.12) |                                                                                                                                                                                                                                                     |
| WHR, Women, Per 0.1 unit increase                                                                      | 1.28 (1.05-1.12) |                                                                                                                                                                                                                                                     |
| Staiano, The Canadian Heart Health Survey Follow-Up Study                                              |                  |                                                                                                                                                                                                                                                     |
| WC, 1-SD increase (cm)                                                                                 | 1.19 (1.11-1.27) | Age, sex, exam year, alcohol consumption status, smoking status and educational level                                                                                                                                                               |
| WHR, 1-SD increase                                                                                     | 1.15 (1.07-1.23) |                                                                                                                                                                                                                                                     |
| Singh, the Cardiometabolic Risk Reduction in South Asia Surveillance Study<br>Waist circumference (cm) |                  |                                                                                                                                                                                                                                                     |
| WC, 1 cm                                                                                               | 0.99 (0.97-1.01) | Age, sex, number of chronic conditions, educational level, occupation, alcohol consumption, smoking status, family history of hypertension, diabetes, and CVD, and BMI                                                                              |
| Taylor, the British Women’s Heart and Health Study                                                     |                  |                                                                                                                                                                                                                                                     |
| WC, 1-SD increase (cm)                                                                                 | 1.09 (0.99-1.19) | Age, socioeconomic class, smoking, and exercise                                                                                                                                                                                                     |
| WHR, 1-SD increase                                                                                     | 1.15 (1.05-1.26) |                                                                                                                                                                                                                                                     |
| HC, 1-SD increase (cm)                                                                                 | 0.99 (0.90-1.08) |                                                                                                                                                                                                                                                     |

Supplementary Materials

|                                                                                      |                  |                                                                                                                                                            |
|--------------------------------------------------------------------------------------|------------------|------------------------------------------------------------------------------------------------------------------------------------------------------------|
| WHtR, 1-SD increase                                                                  | 1.10 (1.01-1.20) |                                                                                                                                                            |
| Taylor, phase 3 of the Caerphilly Prospective Study                                  |                  |                                                                                                                                                            |
| WC, 1-SD increase (cm)                                                               | 1.06 (0.99-1.13) | Age, socioeconomic class, smoking, and exercise                                                                                                            |
| WHR, 1-SD increase                                                                   | 1.08 (1.01-1.16) |                                                                                                                                                            |
| HC, 1-SD increase (cm)                                                               | 1.00 (0.93-1.07) |                                                                                                                                                            |
| WHtR, 1-SD increase                                                                  | 1.07 (1.00-1.15) |                                                                                                                                                            |
| Thomas, the IPC Center cohort study                                                  |                  |                                                                                                                                                            |
| Waist circumference (cm)                                                             |                  |                                                                                                                                                            |
| 61.5 (median)                                                                        | 1.17 (0.93-1.46) | Age, gender, tobacco and alcohol consumption, and regular physical activity                                                                                |
| 79                                                                                   | 1.00             |                                                                                                                                                            |
| 84                                                                                   | 0.92 (0.74-1.15) |                                                                                                                                                            |
| 90                                                                                   | 0.94 (0.76-1.18) |                                                                                                                                                            |
| 113                                                                                  | 1.29 (1.05-1.59) |                                                                                                                                                            |
| Tice, The Breast and Bone Follow-up Study of the Fracture Intervention Trial (B-FIT) |                  |                                                                                                                                                            |
| Waist-to-hip ratio                                                                   |                  |                                                                                                                                                            |
| <0.85                                                                                | 1.00             | Age, history of chronic disease, self-reported health status, smoking status, alcohol drinking, physical activity, BMI, SBP, heart rate, and Grip strength |
| 0.86-0.90                                                                            | 1.00 (0.90-1.20) |                                                                                                                                                            |
| 0.91-0.95                                                                            | 1.10 (1.00-1.30) |                                                                                                                                                            |
| 0.96-0.99                                                                            | 1.20 (1.00-1.30) |                                                                                                                                                            |
| >0.99                                                                                | 1.30 (1.10-1.50) |                                                                                                                                                            |
| Visscher, the Rotterdam study (2001)                                                 |                  |                                                                                                                                                            |
| Waist circumference (cm), Men, Never smokers                                         |                  |                                                                                                                                                            |
| <86                                                                                  | 1.10 (0.50-2.60) | Age                                                                                                                                                        |
| 86-90                                                                                | 1.00             |                                                                                                                                                            |
| 90-95                                                                                | 1.10 (0.50-2.30) |                                                                                                                                                            |
| 95-101                                                                               | 1.50 (0.70-3.10) |                                                                                                                                                            |
| >101                                                                                 | 1.60 (0.80-3.40) |                                                                                                                                                            |
| Visscher, the Rotterdam study (2001)                                                 |                  |                                                                                                                                                            |
| Waist circumference (cm), Women, Never smokers                                       |                  |                                                                                                                                                            |
| <79                                                                                  | 0.80 (0.50-1.30) | Age                                                                                                                                                        |
| 79-85                                                                                | 1.00             |                                                                                                                                                            |
| 85-91                                                                                | 0.90 (0.60-1.30) |                                                                                                                                                            |
| 91-97                                                                                | 1.00 (0.70-1.40) |                                                                                                                                                            |
| >97                                                                                  | 0.80 (0.60-1.10) |                                                                                                                                                            |
| Visscher, the Rotterdam study (2001)                                                 |                  |                                                                                                                                                            |

Supplementary Materials

|                                                                                             |                  |                                                                                                |
|---------------------------------------------------------------------------------------------|------------------|------------------------------------------------------------------------------------------------|
| Waist-to-hip ratio, Men, Never smokers                                                      |                  |                                                                                                |
| >0.89                                                                                       | 1.00 (0.50-2.20) | Age                                                                                            |
| 0.89-0.93                                                                                   | 1.00             |                                                                                                |
| 0.93-0.96                                                                                   | 1.40 (0.70-2.80) |                                                                                                |
| 0.96-1.00                                                                                   | 0.90 (0.40-1.80) |                                                                                                |
| >1.00                                                                                       | 1.40 (0.70-2.60) |                                                                                                |
| Visscher, the Rotterdam study (2001)<br>Waist-to-hip ratio, Women, Never smokers            |                  |                                                                                                |
| <0.80                                                                                       | 0.90 (0.60-1.40) | Age                                                                                            |
| 0.80-0.84                                                                                   | 1.00             |                                                                                                |
| 0.84-0.88                                                                                   | 1.10 (0.80-1.70) |                                                                                                |
| 0.88-0.94                                                                                   | 1.00 (0.70-1.50) |                                                                                                |
| >0.94                                                                                       | 1.00 (0.70-1.40) |                                                                                                |
| Wannamethee, The British Regional Heart Study<br>Waist circumference (cm)                   |                  |                                                                                                |
| <94                                                                                         | 1.00             | Age, social class, physical activity, alcohol intake, smoking, and midarm muscle circumference |
| 94-102                                                                                      | 1.11 (0.92-1.34) |                                                                                                |
| 103-105                                                                                     | 1.32 (1.01-1.73) |                                                                                                |
| >106                                                                                        | 1.54 (1.21-1.95) |                                                                                                |
| Wannamethee, The British Regional Heart Study<br>Waist-to-hip ratio                         |                  |                                                                                                |
| <0.91                                                                                       | 1.00             | Age, social class, physical activity, alcohol intake, smoking, and midarm muscle circumference |
| 0.910-0.948                                                                                 | 1.08 (0.86-1.35) |                                                                                                |
| 0.949-0.985                                                                                 | 1.21 (0.97-1.52) |                                                                                                |
| >0.986                                                                                      | 1.30 (1.04-1.63) |                                                                                                |
| Welborn, National heart foundation risk factor prevalence study<br>Waist circumference (cm) |                  |                                                                                                |
| WC, 1-SD increase, Men                                                                      | 1.08 (0.96-1.21) | Age                                                                                            |
| WC, 1-SD increase, Women                                                                    | 1.18 (1.03-1.35) |                                                                                                |
| Welborn, National heart foundation risk factor prevalence study<br>Waist-to-hip ratio       |                  |                                                                                                |
| WHR, 1-SD increase, Men                                                                     | 1.25 (1.11-1.42) | Age                                                                                            |
| WHR, 1-SD increase, Women                                                                   | 1.24 (1.07-1.43) |                                                                                                |
| Welborn, National heart foundation risk factor prevalence study<br>Waist-to-height ratio    |                  |                                                                                                |

Supplementary Materials

|                                                                                          |                  |                                                                                                                                                        |
|------------------------------------------------------------------------------------------|------------------|--------------------------------------------------------------------------------------------------------------------------------------------------------|
| WHtR, 1-SD increase, Men                                                                 | 1.09 (0.96-1.22) | Age                                                                                                                                                    |
| WHtR, 1-SD increase, Women                                                               | 1.18 (1.08-1.36) |                                                                                                                                                        |
| Wu, the National Health and Nutrition Examination Survey III<br>Thigh circumference (cm) |                  |                                                                                                                                                        |
| TC, Continuous                                                                           | 0.96 (0.95-0.98) | Age, race, sex, and BMI                                                                                                                                |
| Zhang, the Nurses' Health Study<br>Waist circumference (cm)                              |                  |                                                                                                                                                        |
| <71.2                                                                                    | 1.00             | Age, quintiles of physical activity, alcohol consumption, family history of MI, smoking status, menopausal status and hormone use, and body mass index |
| 73.7-76.0                                                                                | 1.11 (0.99-1.25) |                                                                                                                                                        |
| 76.2-81.0                                                                                | 1.17 (1.04-1.32) |                                                                                                                                                        |
| 81.2-88.7                                                                                | 1.31 (1.16-1.48) |                                                                                                                                                        |
| >0.89                                                                                    | 1.71 (1.47-1.98) |                                                                                                                                                        |
| 1-SD increase                                                                            | 1.34 (1.23-1.39) |                                                                                                                                                        |
| Zhang, the Nurses' Health Study<br>Waist circumference (cm), Never smokers               |                  |                                                                                                                                                        |
| <71.2                                                                                    | 1.00             | Age, quintiles of physical activity, alcohol consumption, family history of MI, smoking status, menopausal status and hormone use, and body mass index |
| 73.7-76.0                                                                                | 1.31 (1.05-1.64) |                                                                                                                                                        |
| 76.2-81.0                                                                                | 1.44 (1.14-1.81) |                                                                                                                                                        |
| 81.2-88.7                                                                                | 1.46 (1.15-1.87) |                                                                                                                                                        |
| >0.89                                                                                    | 2.07 (1.57-2.72) |                                                                                                                                                        |
| 1-SD increase                                                                            | 1.24 (1.13-1.34) |                                                                                                                                                        |
| Zhang, the Nurses' Health Study<br>Waist-to-hip ratio                                    |                  |                                                                                                                                                        |
| <0.73                                                                                    | 1.00             | Age, quintiles of physical activity, alcohol consumption, family history of MI, smoking status, menopausal status and hormone use, and body mass index |
| 0.73-0.75                                                                                | 1.09 (0.96-1.23) |                                                                                                                                                        |
| 0.76-0.79                                                                                | 1.14 (1.00-1.29) |                                                                                                                                                        |
| 0.80-0.83                                                                                | 1.33 (1.18-1.50) |                                                                                                                                                        |
| ≥0.84                                                                                    | 1.59 (1.41-1.79) |                                                                                                                                                        |
| 1-SD increase                                                                            | 1.13 (1.10-1.16) |                                                                                                                                                        |
| Zhang, the Nurses' Health Study<br>Waist-to-hip ratio, Never smokers                     |                  |                                                                                                                                                        |
| <0.73                                                                                    | 1.00             | Age, quintiles of physical activity, alcohol consumption, family history of MI, smoking status, menopausal status and hormone use, and body mass index |
| 0.73-0.75                                                                                | 1.23 (0.99-1.53) |                                                                                                                                                        |
| 0.76-0.79                                                                                | 1.13 (0.91-1.41) |                                                                                                                                                        |
| 0.80-0.83                                                                                | 1.43 (1.16-1.76) |                                                                                                                                                        |

Supplementary Materials

|                                                                                           |                  |                                                                                                                                                                                 |
|-------------------------------------------------------------------------------------------|------------------|---------------------------------------------------------------------------------------------------------------------------------------------------------------------------------|
| ≥0.84                                                                                     | 1.70 (1.37-2.09) |                                                                                                                                                                                 |
| 1-SD increase                                                                             | 1.12 (1.06-1.17) |                                                                                                                                                                                 |
| Zhang, the Nurses' Health Study<br>Hip circumference (cm), with adjustment for BMI and WC |                  |                                                                                                                                                                                 |
| <94                                                                                       | 1.00             | Age, quintiles of physical activity, alcohol consumption, family history of MI, smoking status, menopausal status and hormone use, body mass index, and waist circumference     |
| 94-99                                                                                     | 0.87 (0.78-0.97) |                                                                                                                                                                                 |
| 99                                                                                        | 0.71 (0.62-0.82) |                                                                                                                                                                                 |
| 102-109                                                                                   | 0.74 (0.67-0.87) |                                                                                                                                                                                 |
| >114                                                                                      | 0.73 (0.62-0.86) |                                                                                                                                                                                 |
| Zhao, the Tobago Health study<br>Waist circumference (cm)                                 |                  |                                                                                                                                                                                 |
| WC, 1-SD increase                                                                         | 1.01 (0.80-1.28) | Age, height, smoking status, alcohol consumption, physical activity, TV viewing time, health status, cancer, T2D, renal disease, stroke, myocardial infarction and hypertension |

BMI, body mass index; CVD, cardiovascular disease; DBP, diastolic blood pressure; HEI, healthy eating index; MI, myocardial infarction; SBP, systolic blood pressure; T2D, type 2 diabetes; TV, television; WC, waist circumference; WHtR, waist-to-height ratio; WHR, waist-to-hip ratio.

Supplementary Materials

**Table S4.** Quality assessment for studies included the meta-analysis of central fatness and the risk of all-cause mortality (Newcastle Ottawa Scale).

| Author, Year            | Selection |   |   |   | Comparability |   | Outcome |   |   | Score | Quality  |
|-------------------------|-----------|---|---|---|---------------|---|---------|---|---|-------|----------|
|                         | 1         | 2 | 3 | 4 | 1             | 2 | 1       | 2 | 3 |       |          |
| Adegbija, 2016          |           | * | * | * | *             | * | *       | * |   | 7     | High     |
| Andersen, 2015 (men)    | *         | * | * | * | *             | * | *       |   | * | 8     | High     |
| Andersen, 2015(women)   | *         | * | * | * | *             | * | *       | * | * | 9     | High     |
| Baik, 2000              | *         | * |   | * | *             | * | *       | * |   | 7     | High     |
| Beleigoli, 2012         | *         | * | * | * | *             | * | *       | * | * | 9     | High     |
| Bellocco, 2010          | *         | * |   | * | *             | * | *       | * | * | 8     | High     |
| Berentzen, 2010         | *         | * | * | * | *             | * | *       |   | * | 8     | High     |
| Bigaard, 2004           | *         | * | * | * | *             | * | *       |   | * | 8     | High     |
| Boggs, 2011             | *         | * |   | * | *             | * | *       | * | * | 8     | High     |
| Bombelli, 2013          | *         | * | * | * | *             |   | *       | * |   | 7     | High     |
| Bowman, 2017            | *         | * | * | * | *             | * | *       |   |   | 7     | High     |
| Calori, 2011            | *         | * | * | * | *             |   | *       | * |   | 7     | High     |
| Cameron, 2009           | *         | * | * | * | *             |   | *       |   |   | 6     | Moderate |
| Cohen, 2012             | *         | * | * | * | *             | * | *       |   |   | 7     | High     |
| Danon-hersch, 2017      | *         | * | * | * | *             |   | *       |   | * | 7     | High     |
| Dhana, 2015             | *         | * | * | * | *             |   | *       | * |   | 7     | High     |
| Dolan, 2007             | *         | * | * | * |               |   |         |   | * | 5     | Moderate |
| Folsom, 2000            | *         | * |   | * | *             |   | *       | * | * | 7     | High     |
| Grant, 2017             | *         | * | * | * | *             | * | *       |   |   | 7     | High     |
| Guallar-Castillón, 2009 | *         | * | * | * | *             | * | *       |   | * | 8     | High     |
| He, 2016                |           | * | * | * | *             | * | *       |   | * | 7     | High     |
| Heitmann, 2004          | *         | * | * | * | *             | * | *       | * | * | 9     | High     |
| Heitmann, 2009          | *         | * | * | * | *             | * | *       | * | * | 9     | High     |

Supplementary Materials

|                        |   |   |   |   |   |   |   |   |   |   |          |
|------------------------|---|---|---|---|---|---|---|---|---|---|----------|
| Hotchkiss, 2013        | * | * | * | * | * | * | * | * |   | 8 | High     |
| Howell, 2018           | * | * | * | * | * |   | * | * |   | 7 | High     |
| Hu, 2018               | * | * | * | * | * | * | * |   | * | 8 | High     |
| Jacobs, 2010           | * | * |   | * | * | * | * | * |   | 7 | High     |
| Janssen, 2005          | * | * | * | * | * | * | * |   | * | 8 | High     |
| Kahn, 2012             | * | * | * | * | * | * | * | * |   | 8 | High     |
| Kalmijn, 1999          | * | * | * | * | * | * | * |   | * | 8 | High     |
| Katzmarzyk, 2013       | * | * | * | * | * | * | * |   |   | 7 | High     |
| Klingberg, 2015        | * | * | * | * | * | * | * | * |   | 8 | High     |
| Koster, 2008           | * | * |   | * | * | * | * | * | * | 8 | High     |
| Krakauer, 2012         | * | * | * | * | * |   | * |   |   | 6 | Moderate |
| Krakauer, 2014         | * | * | * | * | * |   | * | * |   | 7 | High     |
| Lahmann, 2002          | * | * | * | * | * | * | * |   | * | 8 | High     |
| Lanfer, 2014           | * | * | * | * | * | * | * | * | * | 9 | High     |
| Laukkanen, 2007        | * | * | * | * | * | * | * | * | * | 9 | High     |
| Lee, 1999              | * | * | * | * | * | * | * |   |   | 7 | High     |
| Lee, 2012              | * | * | * | * | * | * | * |   |   | 7 | High     |
| Lindqvist, 2006        | * | * | * | * | * | * |   |   |   | 6 | Moderate |
| Lissner, 2001          |   | * | * | * | * | * | * | * |   | 7 | High     |
| Martinez-Gomez, 2014   | * | * | * | * | * | * | * | * | * | 9 | High     |
| Mason, 2008            | * | * | * | * | * | * | * | * |   | 8 | High     |
| McNeely, 2012          |   | * | * | * | * |   | * | * |   | 6 | Moderate |
| Moliner-Urdiales, 2003 | * | * | * | * | * | * | * |   |   | 7 | High     |
| Park, 2018             | * | * | * | * | * | * | * |   | * | 8 | High     |
| Petursson, 2011        | * | * | * | * | * | * | * | * |   | 8 | High     |
| Pischon, 2008          | * | * | * | * | * | * | * | * | * | 9 | High     |

Supplementary Materials

|                   |   |   |   |   |   |   |   |   |   |   |          |
|-------------------|---|---|---|---|---|---|---|---|---|---|----------|
| Price, 2006       | * | * | * | * | * | * | * |   |   | 7 | High     |
| Pujilestari, 2019 | * | * | * | * | * |   | * |   | * | 7 | High     |
| Reis, 2009        | * | * | * | * | * | * | * | * |   | 8 | High     |
| Rost, 2018        | * | * | * | * | * | * | * | * | * | 9 | High     |
| Saito, 2012       | * | * | * | * | * | * | * | * |   | 8 | High     |
| Sardarina, 2016   | * | * | * | * | * |   | * | * |   | 7 | High     |
| Sato, 2017        | * | * | * | * | * |   | * |   |   | 6 | Moderate |
| Schneider, 2010   | * | * | * | * | * | * | * |   | * | 8 | High     |
| Simpson, 2007     | * | * | * | * | * | * | * | * | * | 9 | High     |
| Singh, 2018       | * | * | * | * | * | * |   |   |   | 6 | Moderate |
| Srikanthan, 2009  | * | * | * | * | * |   | * | * |   | 7 | High     |
| Staiano, 2012     | * | * | * | * | * | * | * | * |   | 8 | High     |
| Taylor, 2010      | * | * | * | * | * | * | * |   | * | 8 | High     |
| Taylor, 2010      | * | * | * | * | * | * | * |   | * | 8 | High     |
| Thomas, 2011      | * | * | * | * | * | * | * |   | * | 8 | High     |
| Thomson, 2016     | * | * | * | * | * | * | * | * |   | 8 | High     |
| Tice, 2006        | * | * | * | * | * | * | * | * | * | 9 | High     |
| Visscher, 2001    | * | * | * | * |   |   | * |   |   | 5 | Moderate |
| Wannamethee, 2007 | * | * | * | * | * | * | * |   | * | 8 | High     |
| Welborn, 2007     | * | * | * | * | * |   | * | * |   | 7 | High     |
| Wu, 2017          | * | * | * | * | * | * | * | * |   | 8 | High     |
| Zhang, 2008       | * | * |   | * | * | * | * | * | * | 8 | High     |
| Zhao, 2016        |   | * | * | * | * | * | * |   | * | 7 | High     |



Supplementary Materials

**Table S5.** Subgroup analyses of waist-to-height ratio (0.1-unit) and the risk of all-cause mortality.

|                                   |     | <i>n</i> | HR (95%CI)          | <i>I</i> <sup>2</sup> (%), <i>P</i> <sub>heterogeneity</sub> |
|-----------------------------------|-----|----------|---------------------|--------------------------------------------------------------|
| <b>All studies</b>                |     | 11       | 1.24 (1.12 to 1.36) | 94%, <0.001                                                  |
| <b>Sex</b>                        |     |          |                     |                                                              |
| Men                               |     | 8        | 1.13 (1.01 to 1.24) | 77%, <0.001                                                  |
| Women                             |     | 8        | 1.20 (1.07 to 1.32) | 89%, <0.001                                                  |
| <b>Healthy participants</b>       |     |          |                     |                                                              |
| All                               |     | 4        | 1.18 (1.03 to 1.34) | 88%, <0.001                                                  |
| <b>Geographic region</b>          |     |          |                     |                                                              |
| US                                |     | 2        | 1.24 (1.09 to 1.39) | 59%, 0.12                                                    |
| Europe                            |     | 4        | 1.24 (1.06 to 1.42) | 96%, <0.001                                                  |
| Asia                              |     | 5        | 1.23 (0.97 to 1.50) | 94%, <0.001                                                  |
| <b>Follow-up duration</b>         |     |          |                     |                                                              |
| <10 years                         |     | 6        | 1.26 (1.03 to 1.49) | 93%, <0.001                                                  |
| >10 years                         |     | 5        | 1.21 (1.07 to 1.36) | 95%, <0.001                                                  |
| <b>Anthropometric assessment</b>  |     |          |                     |                                                              |
| Measured                          |     | 11       | 1.24 (1.12 to 1.36) | 94%, <0.001                                                  |
| Self-reported                     |     | -        | -                   | -                                                            |
| <b>Number of cases</b>            |     |          |                     |                                                              |
| <1000                             |     | 4        | 1.19 (1.02 to 1.36) | 73%, 0.012                                                   |
| >1000                             |     | 7        | 1.27 (1.12 to 1.42) | 96%, <0.001                                                  |
| <b>Study quality</b>              |     |          |                     |                                                              |
| 0–3 stars                         |     | -        | -                   | -                                                            |
| 4–6 stars                         |     | 1        | 0.97 (0.88 to 1.07) | -                                                            |
| 7–9 stars                         |     | 10       | 1.27 (1.14 to 1.40) | 95%, <0.001                                                  |
| <b>Adjustment for confounders</b> |     |          |                     |                                                              |
| Body mass index                   | Yes | 2        | 1.42 (1.16 to 1.69) | 69%, 0.07                                                    |
|                                   | No  | 9        | 1.20 (1.08 to 1.33) | 95%, <0.001                                                  |
| Physical activity                 | Yes | 6        | 1.40 (1.25 to 1.54) | 86%, <0.001                                                  |
|                                   | No  | 5        | 1.05 (0.97 to 1.14) | 72%, 0.006                                                   |
| Smoking status                    | Yes | 10       | 1.24 (1.11 to 1.37) | 95%, <0.001                                                  |
|                                   | No  | 1        | 1.21 (1.06 to 1.37) | -                                                            |
| Alcohol drinking                  | Yes | 4        | 1.48 (1.37 to 1.59) | 50%, 0.10                                                    |
|                                   | No  | 7        | 1.10 (1.00 to 1.20) | 90%, <0.001                                                  |

Supplementary Materials

|                                                                          |     |   |                     |             |
|--------------------------------------------------------------------------|-----|---|---------------------|-------------|
| Body mass index, physical activity, smoking status, and alcohol drinking | Yes | 3 | 1.46 (1.32 to 1.59) | 61%, 0.08   |
|                                                                          | No  | 8 | 1.15 (1.04 to 1.26) | 92%, <0.001 |
| <b>Adjustment for intermediates</b>                                      |     |   |                     |             |
| Blood pressure                                                           | Yes | 5 | 1.15 (0.95 to 1.34) | 95%, <0.001 |
|                                                                          | No  | 6 | 1.31 (1.19 to 1.44) | 79%, <0.001 |
| Serum cholesterol                                                        | Yes | 4 | 1.05 (0.93 to 1.18) | 84%, <0.001 |
|                                                                          | No  | 7 | 1.35 (1.22 to 1.47) | 85%, <0.001 |
| Type 2 diabetes                                                          | Yes | 4 | 1.05 (0.93 to 1.18) | 84%, <0.001 |
|                                                                          | No  | 7 | 1.35 (1.22 to 1.47) | 85%, <0.001 |
| Blood pressure, serum cholesterol, and type 2 diabetes                   | Yes | 4 | 1.05 (0.93 to 1.18) | 84%, <0.001 |
|                                                                          | No  | 7 | 1.35 (1.22 to 1.47) | 85%, <0.001 |

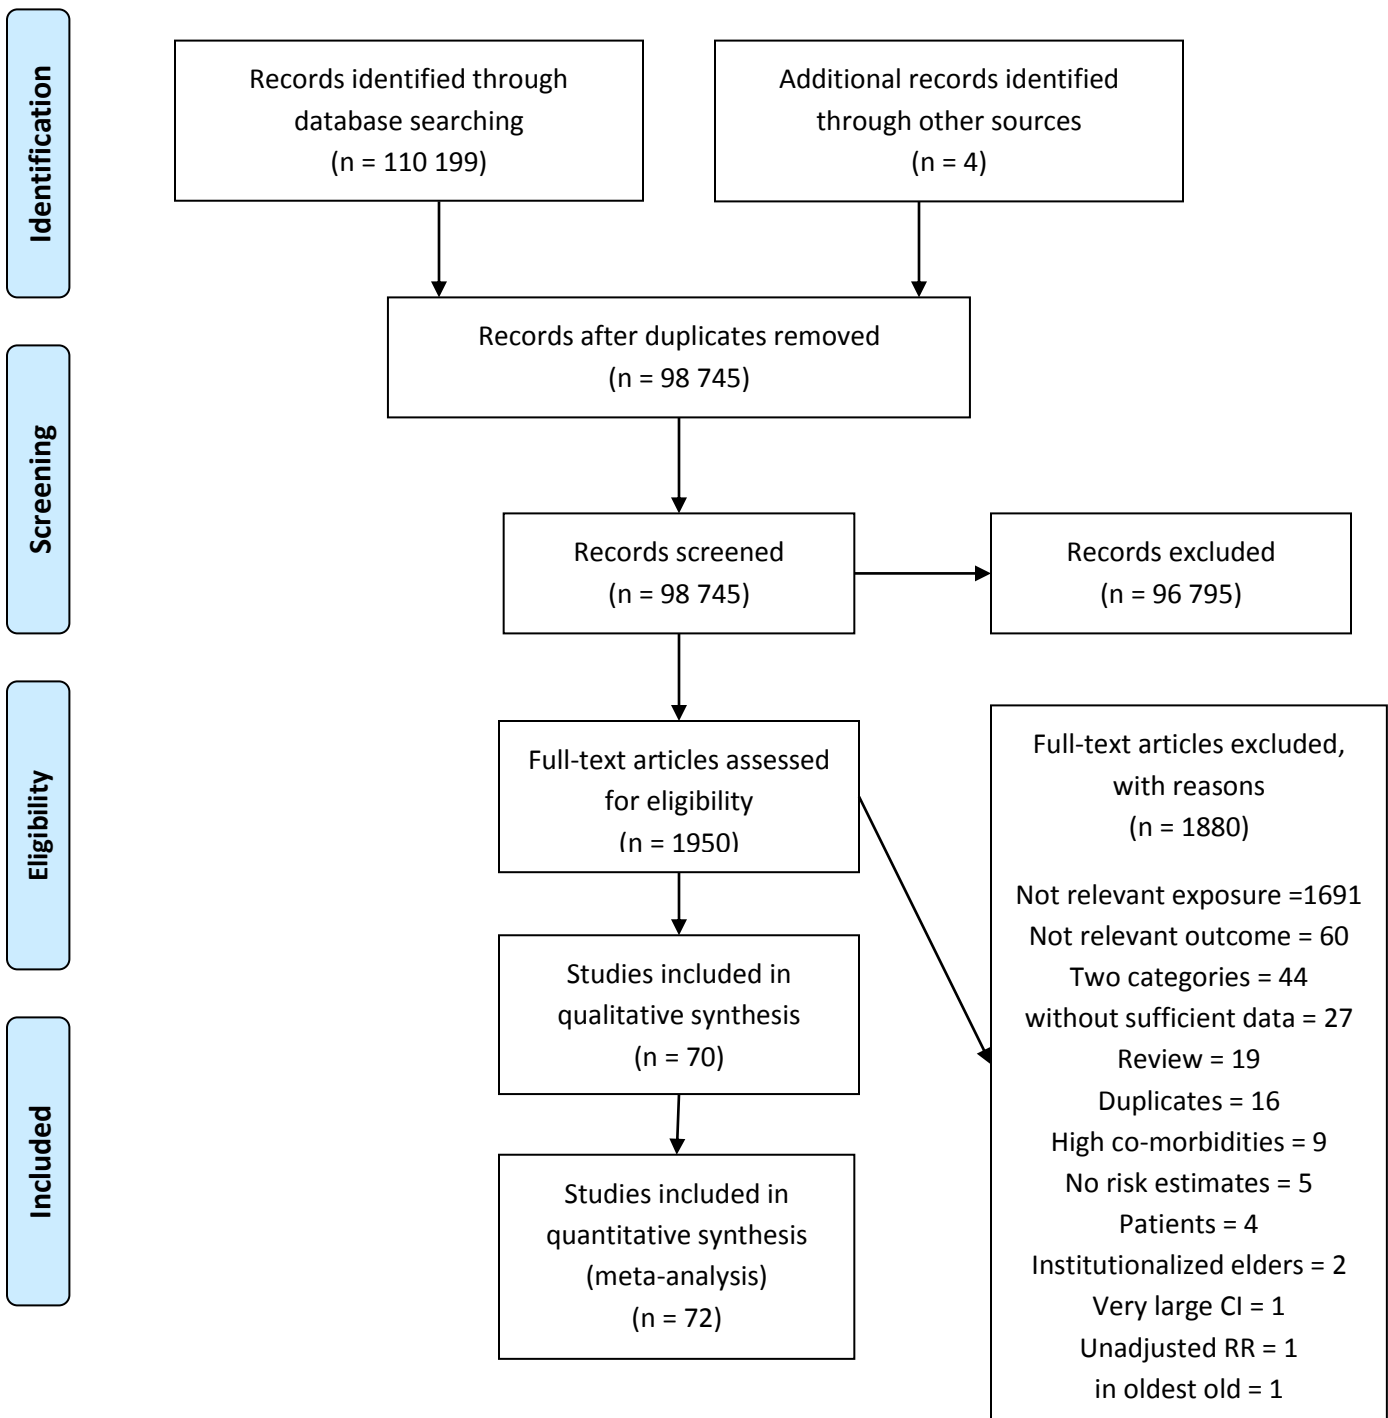

**Figure S1.** Study selection process for inclusion in the meta-analysis of central fatness and the risk of all-cause mortality.

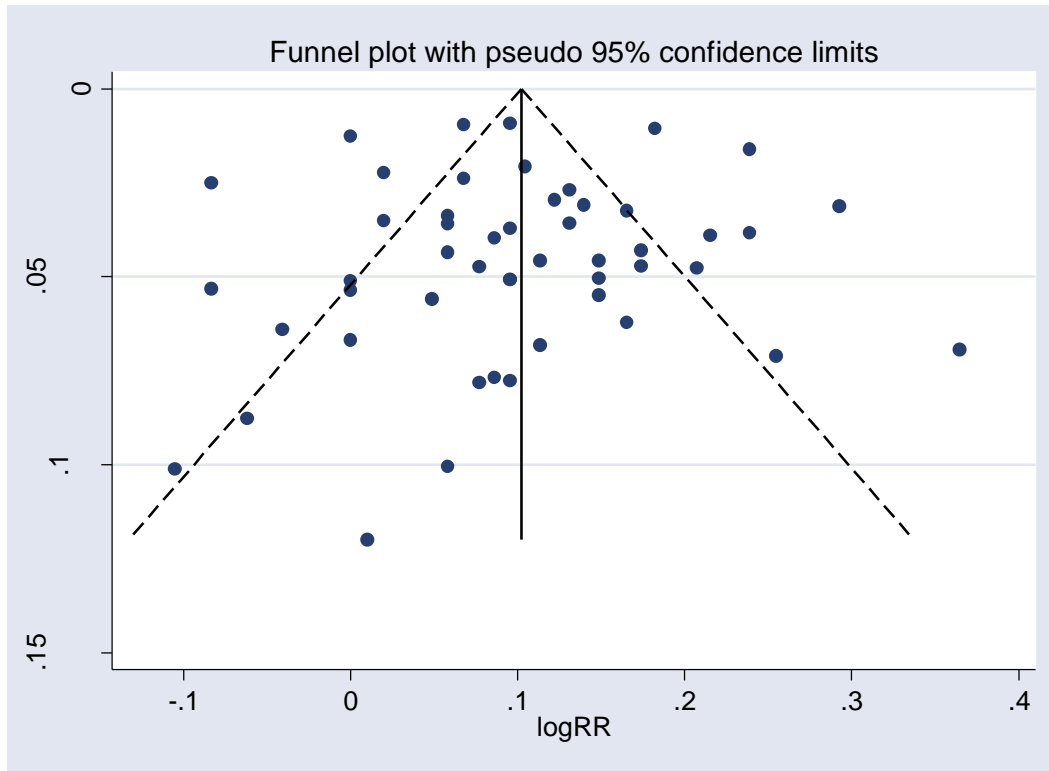

**Figure S2.** Funnel plot of the relative risks of 50 studies on Waist Circumference (10-cm) and the risk of all-cause mortality. Begg's test  $P=0.58$ , Egger's test  $P=1.00$ . Log RR: natural logarithm of relative risk. s.e: standard error.

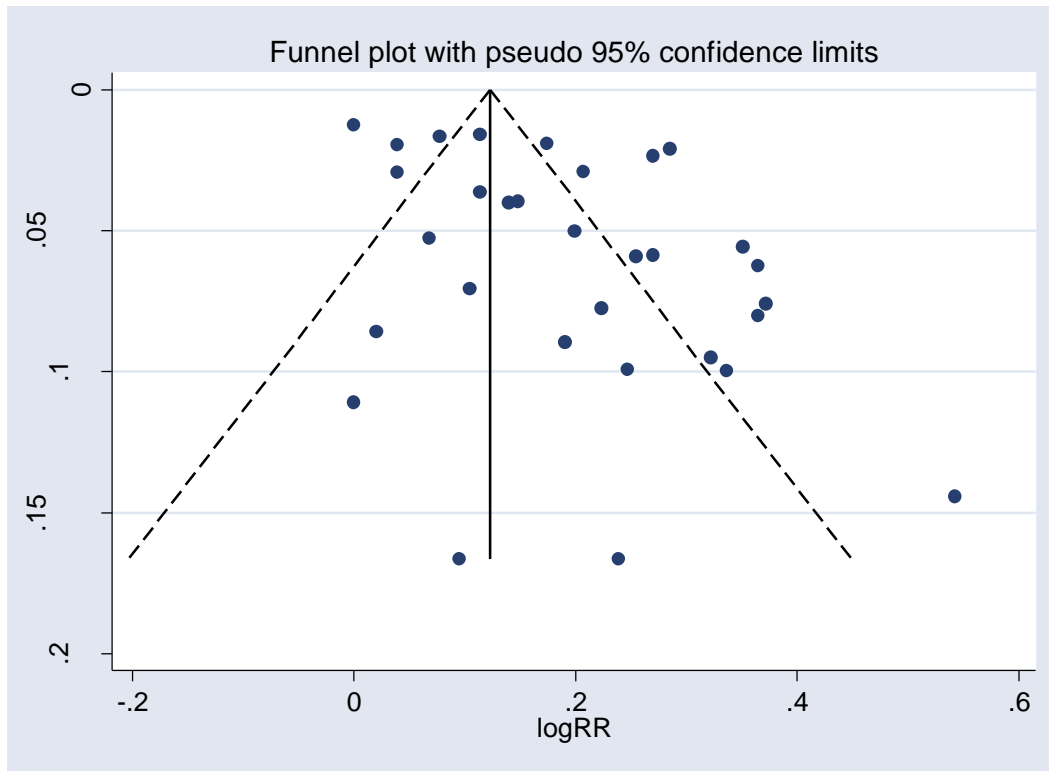

**Figure S3.** Funnel plot of the relative risks of 31 studies on Waist-to-Hip Ratio (0.1-unit) and the risk of all-cause mortality. Begg's test  $P=0.52$ , Egger's test  $P=0.19$ . Log RR: natural logarithm of relative risk. s.e: standard error.

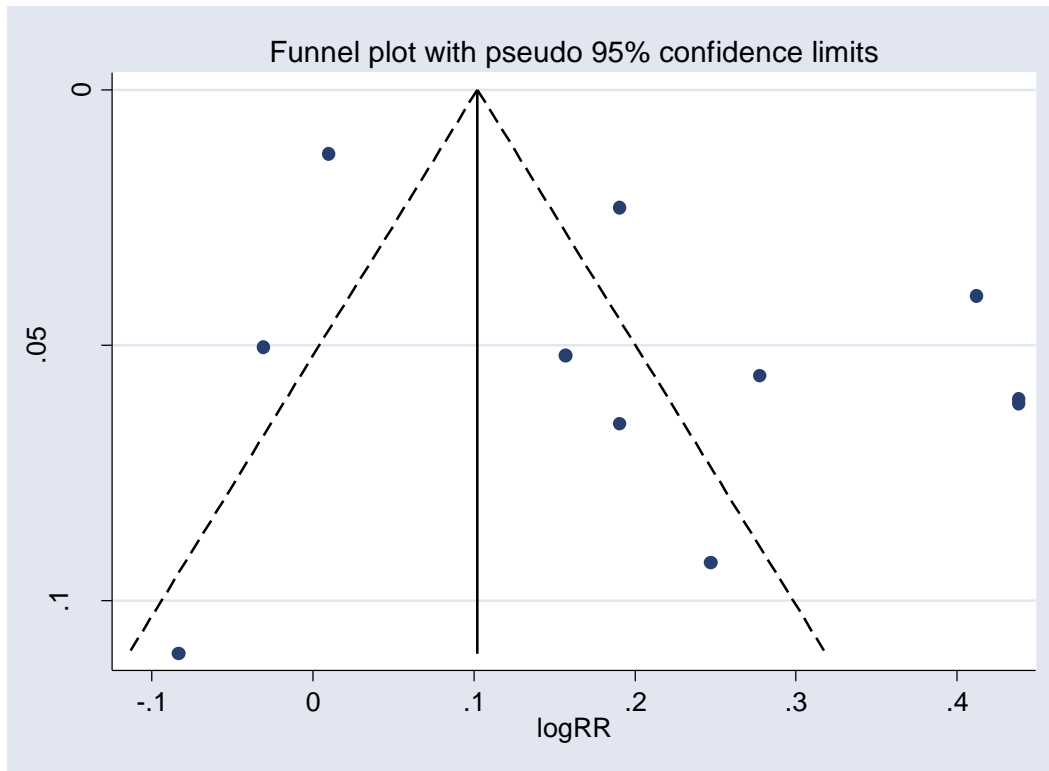

**Figure S4.** Funnel plot of the relative risks of 11 studies on Waist-to-Height Ratio (0.1-unit) and the risk of all-cause mortality. Begg's test  $P=0.08$ , Egger's test  $P=0.05$ . Log RR: natural logarithm of relative risk. s.e: standard error.

Supplementary Materials

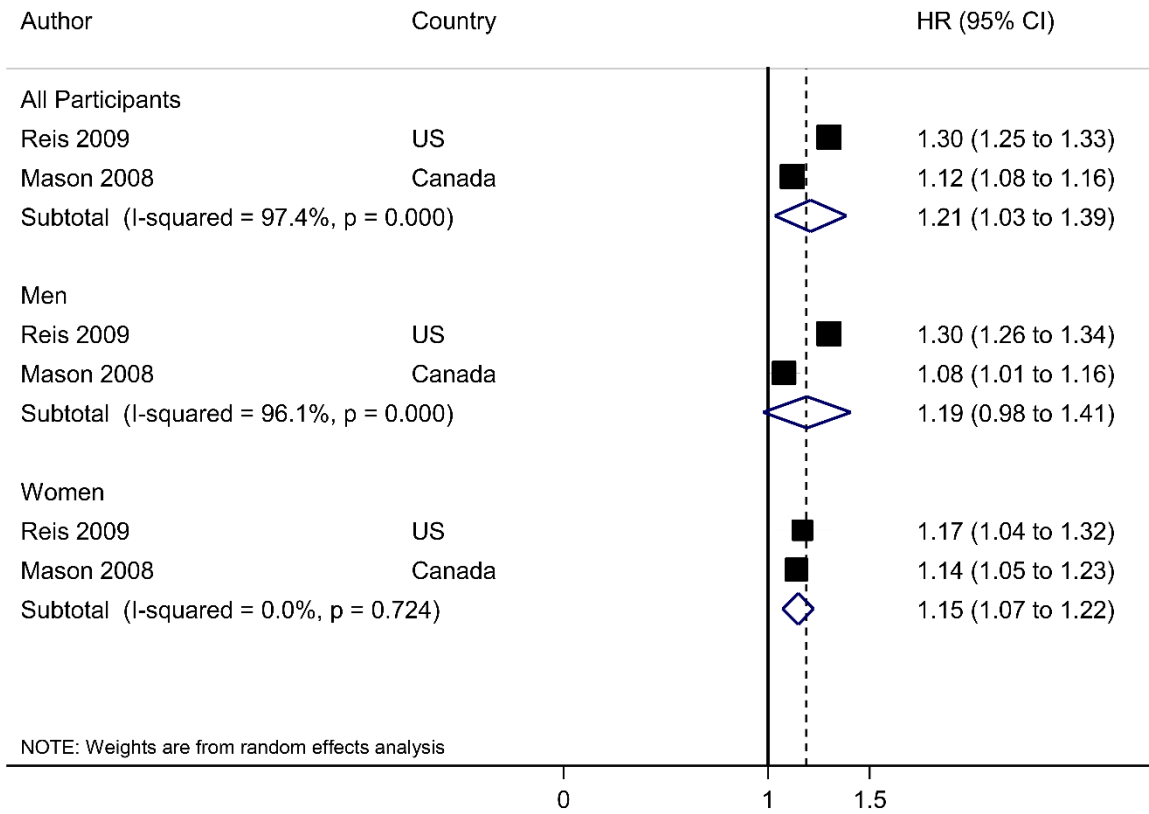

**Figure S5.** Summary hazard ratio of all-cause mortality for a 0.1 unit increment in Waist-to-Thigh ratio. HR: hazard ratio.

Supplementary Materials

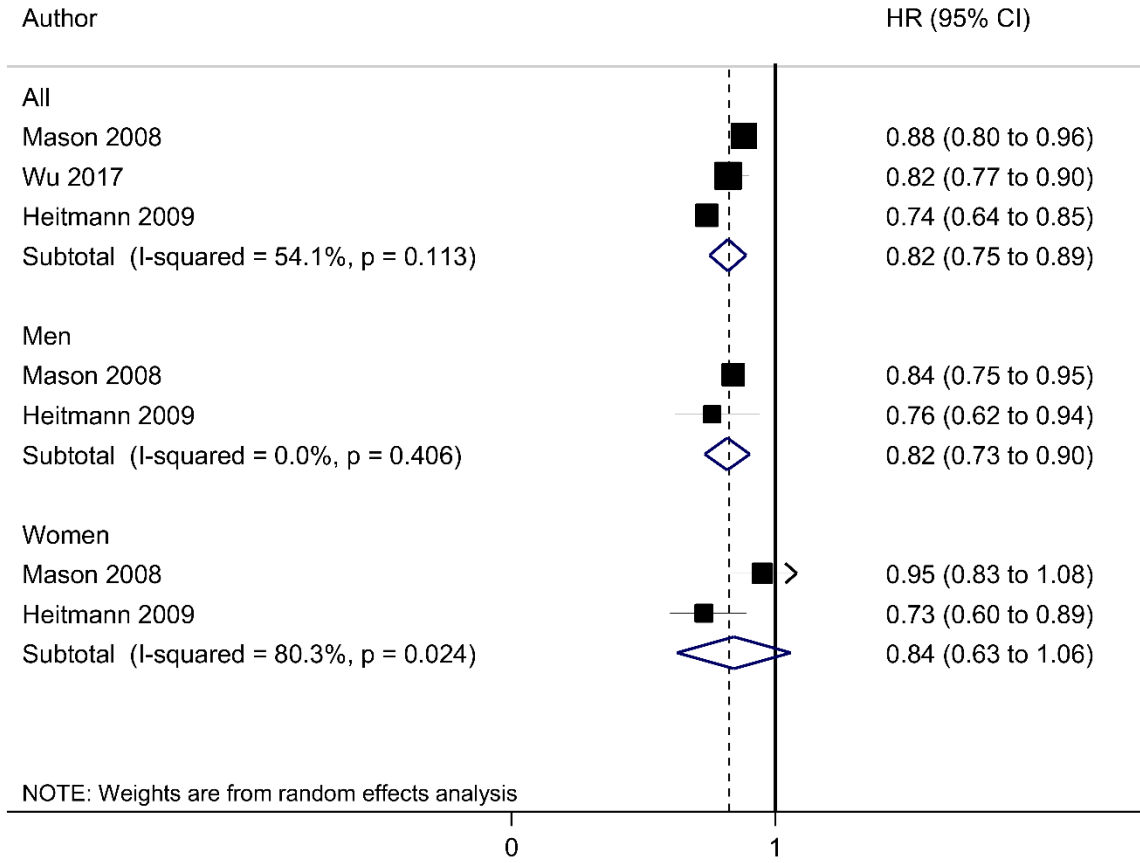

**Figure S6.** Summary hazard ratio of all-cause mortality for a 5-cm increment in Thigh Circumference. HR: hazard ratio.



Supplementary Materials

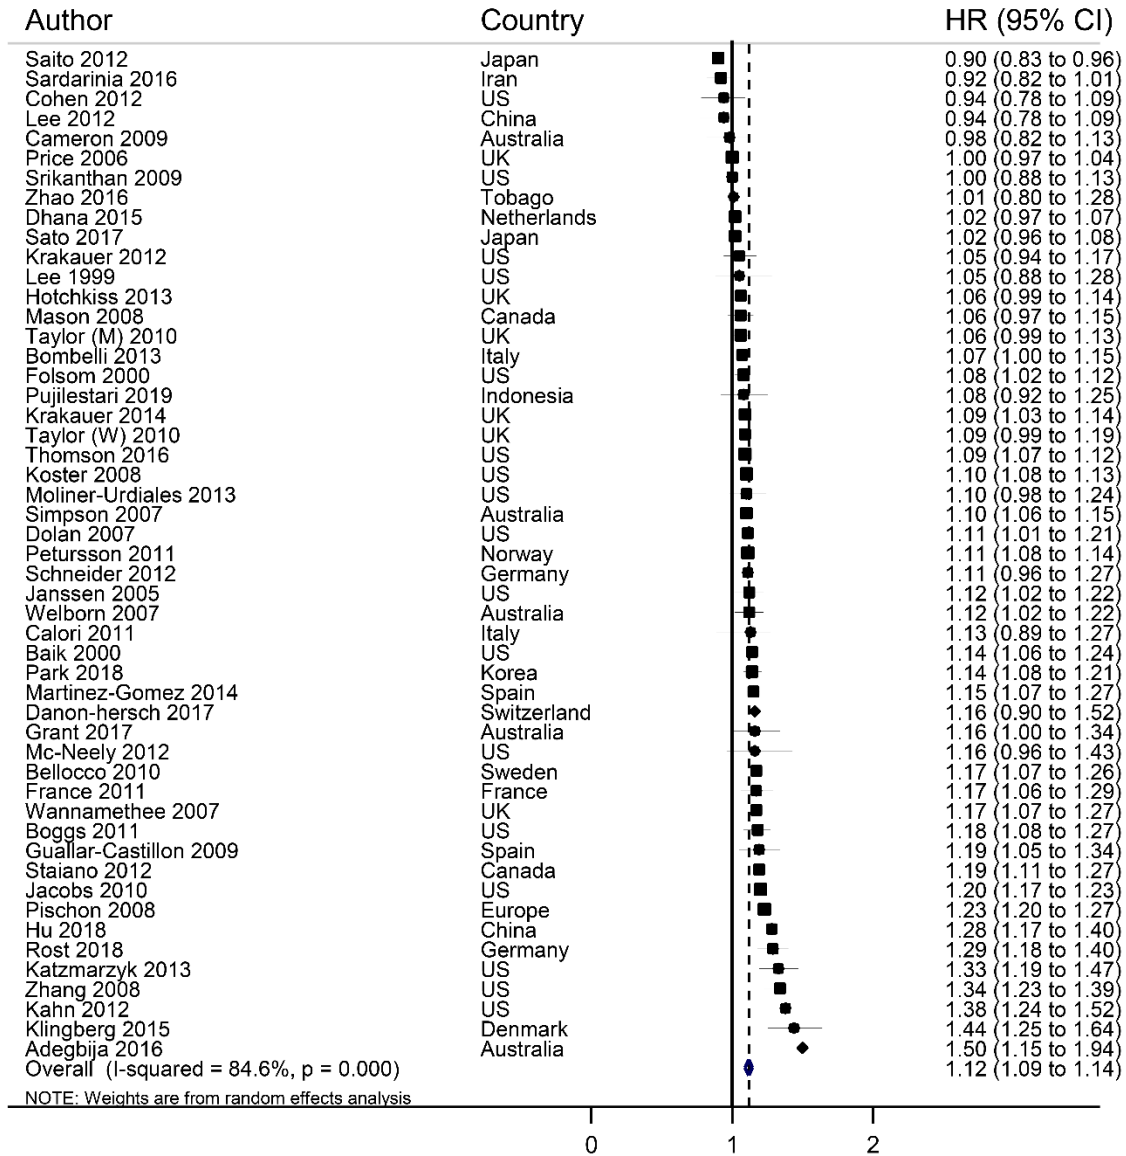

**Figure S7.** Summary hazard ratio of all-cause mortality for a one standard deviation increment in Waist Circumference. HR: hazard ratio; M, men; W, women.

Supplementary Materials

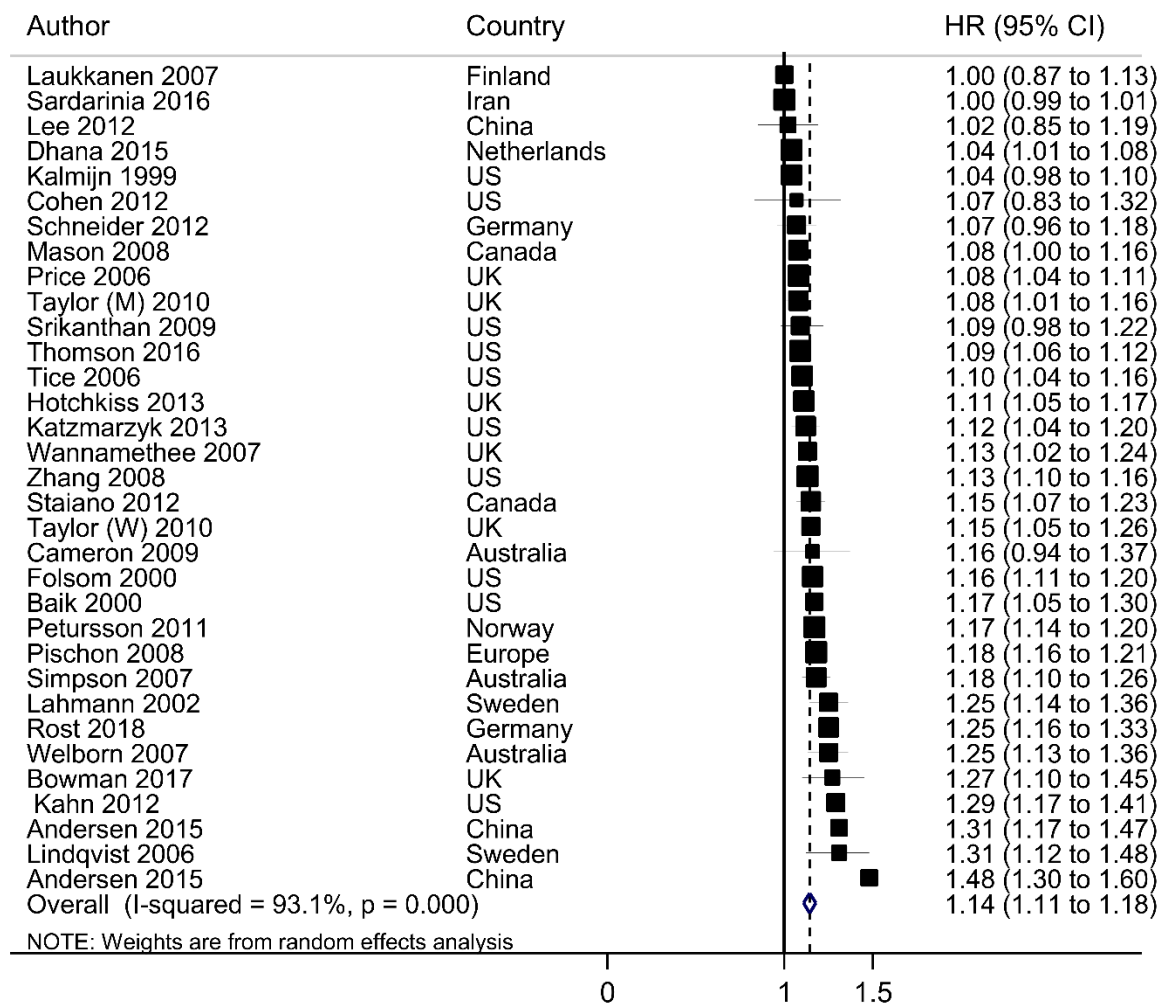

**Figure S8.** Summary hazard ratio of all-cause mortality for a one standard deviation increment in Waist-to-Hip ratio. HR: hazard ratio; M, men; W, women.

Supplementary Materials

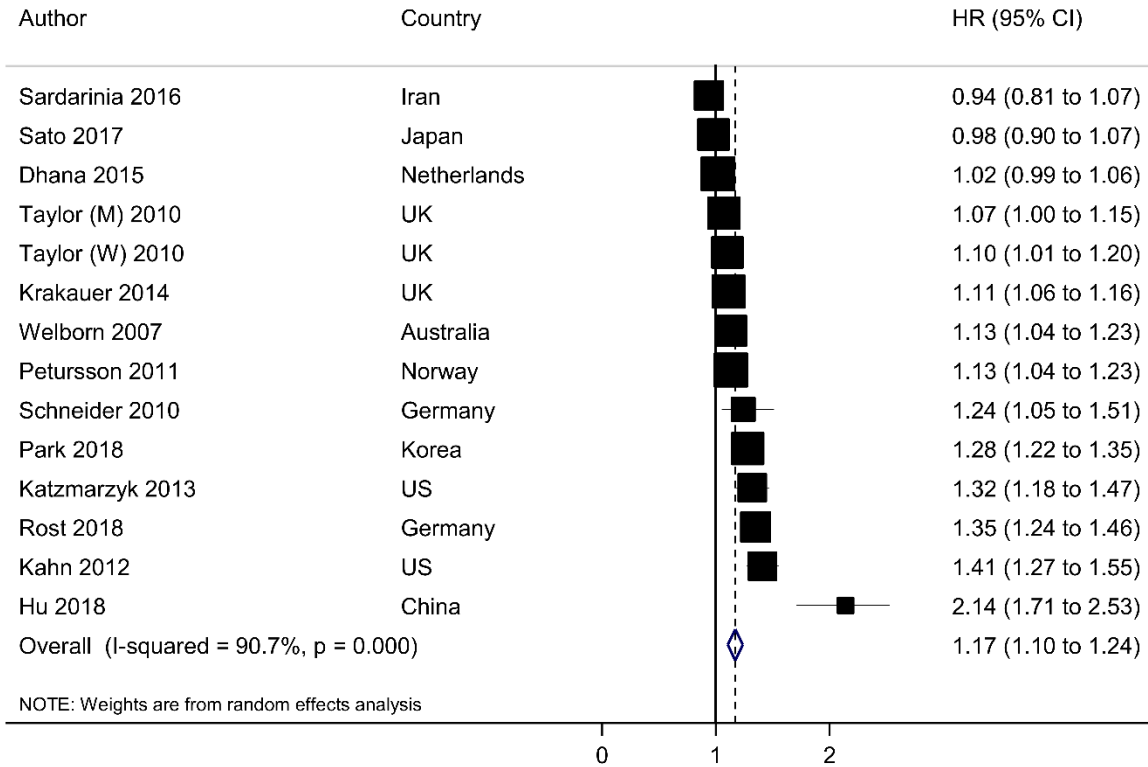

**Figure S9.** Summary hazard ratio of all-cause mortality for a one standard deviation increment in Waist-to-Height ratio. HR: hazard ratio; M, men; W, women.

Supplementary Materials

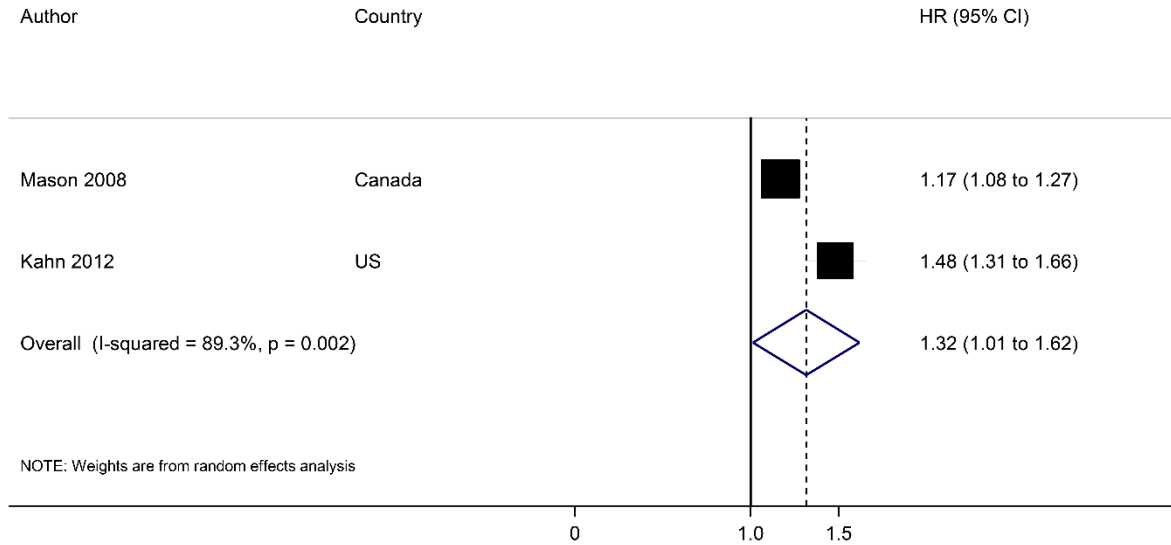

**Figure S10.** Summary hazard ratio of all-cause mortality for a one standard deviation increment in Waist-to-Thigh ratio. HR: hazard ratio.

Supplementary Materials

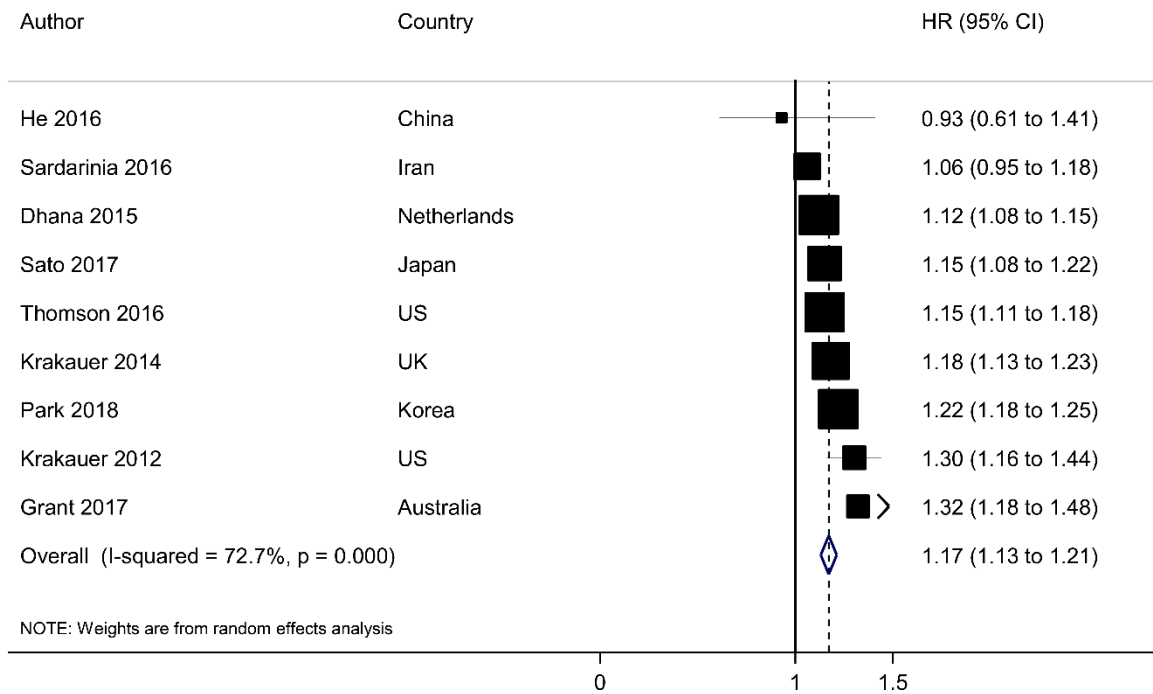

**Figure S11.** Summary hazard ratio of all-cause mortality for a one standard deviation increment in A Body Shape Index. HR: hazard ratio.

Supplementary Materials

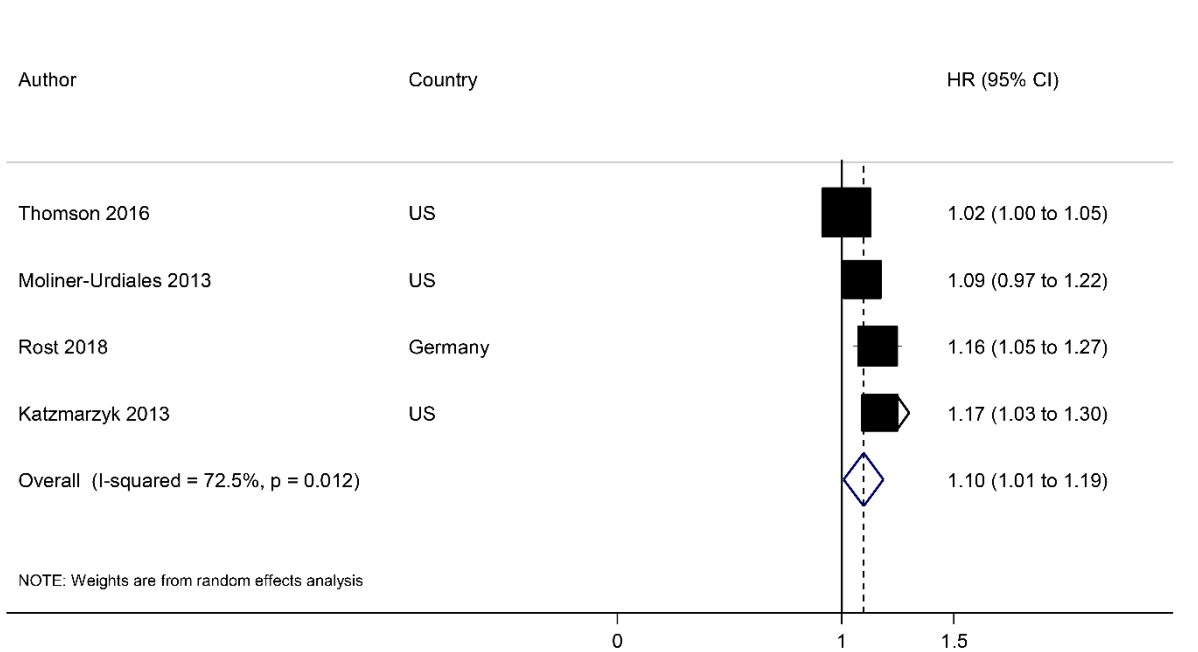

**Figure S12.** Summary hazard ratio of all-cause mortality for a one standard deviation increment in Body Adiposity Index. HR: hazard ratio.

Supplementary Materials

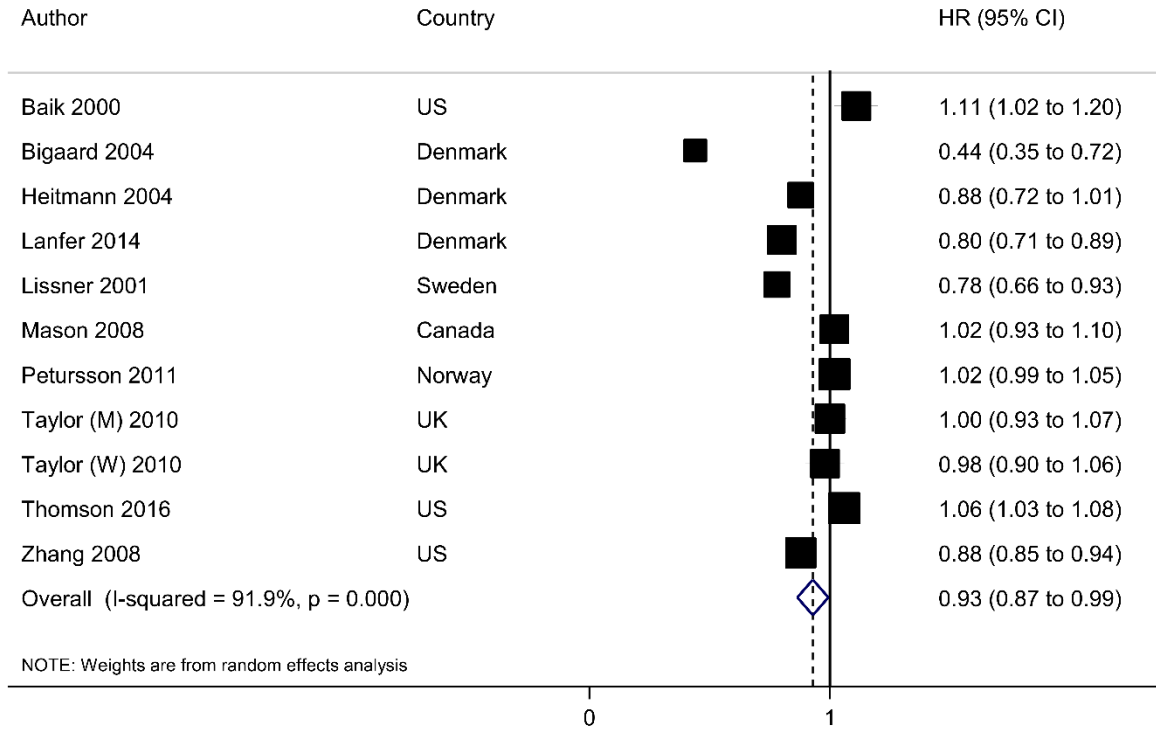

**Figure S13.** Summary hazard ratio of all-cause mortality for a one standard deviation increment in Hip Circumference. HR: hazard ratio; M, men; W, women.

Supplementary Materials

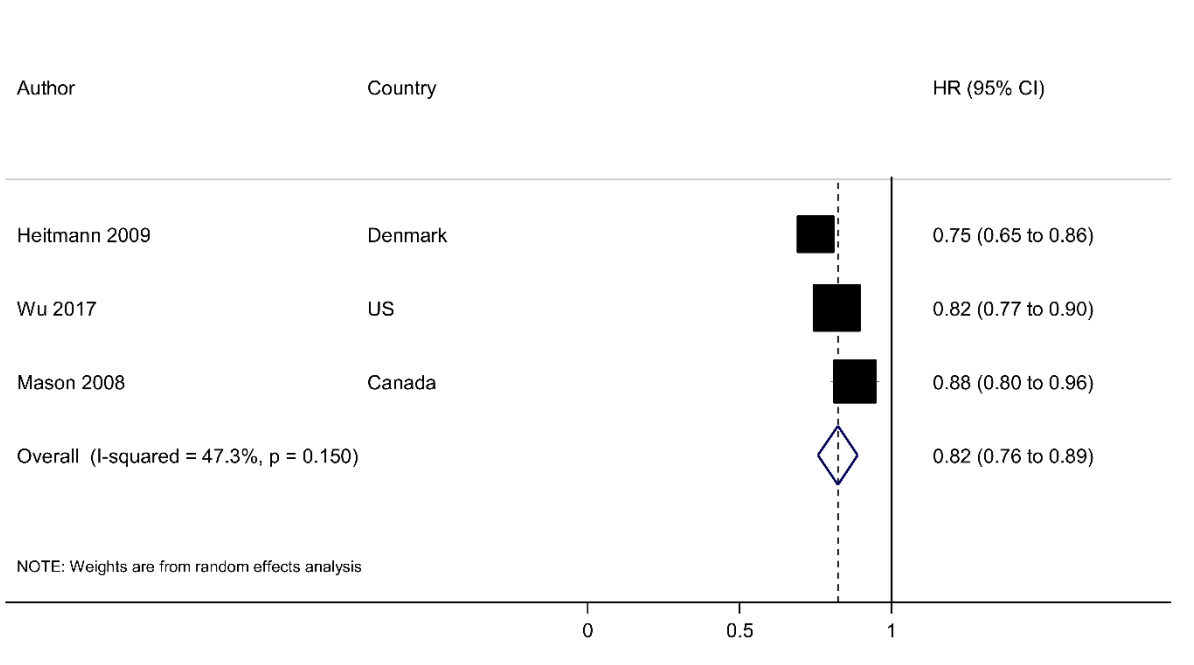

**Figure S14.** Summary hazard ratio of all-cause mortality for a one standard deviation increment in Thigh Circumference. HR, hazard ratio.
